# Supplementary material for: Respiratory patient experience of measures to reduce risk of COVID-19: findings from a descriptive cross-sectional UK wide survey
Source: PubMed Central journal article supplement — BMJ Open. 2020 Sep 9;10(9):e040951. doi: 10.1136/bmjopen-2020-040951 (PMC7482474; doi:10.1136/bmjopen-2020-040951), 2020-09-09
Supplement: bmjopen-2020-040951.draft_revisions.pdf [file bmjopen-2020-040951.draft_revisions.pdf]

# BMJ Open

BMJ Open is committed to open peer review. As part of this commitment we make the peer review history of every article we publish publicly available.

When an article is published we post the peer reviewers' comments and the authors' responses online. We also post the versions of the paper that were used during peer review. These are the versions that the peer review comments apply to.

The versions of the paper that follow are the versions that were submitted during the peer review process. They are not the versions of record or the final published versions. They should not be cited or distributed as the published version of this manuscript.

BMJ Open is an open access journal and the full, final, typeset and author-corrected version of record of the manuscript is available on our site with no access controls, subscription charges or pay-per-view fees (<http://bmjopen.bmj.com>).

If you have any questions on BMJ Open's open peer review process please email [info.bmjopen@bmj.com](mailto:info.bmjopen@bmj.com)

# BMJ Open

## Patient experience of measures to reduce risk of COVID-19: findings from a survey by the Asthma UK and British Lung Foundation Partnership

|                               |                                                                                                                                                                                                                                                                                                                                                                                        |
|-------------------------------|----------------------------------------------------------------------------------------------------------------------------------------------------------------------------------------------------------------------------------------------------------------------------------------------------------------------------------------------------------------------------------------|
| Journal:                      | <i>BMJ Open</i>                                                                                                                                                                                                                                                                                                                                                                        |
| Manuscript ID                 | bmjopen-2020-040951                                                                                                                                                                                                                                                                                                                                                                    |
| Article Type:                 | Original research                                                                                                                                                                                                                                                                                                                                                                      |
| Date Submitted by the Author: | 26-May-2020                                                                                                                                                                                                                                                                                                                                                                            |
| Complete List of Authors:     | Philip, Keir; National Heart and Lung Institute<br>Cumella, Andrew; Asthma UK and British Lung Foundation Partnership<br>Farrington-Douglas, Joe; Asthma UK and British Lung Foundation Partnership<br>Laffan, Michael; Asthma UK and British Lung Foundation Partnership<br>Hopkinson, Nicholas; National Heart and Lung Institute; Asthma UK and British Lung Foundation Partnership |
| Keywords:                     | Public health < INFECTIOUS DISEASES, MENTAL HEALTH, RESPIRATORY MEDICINE (see Thoracic Medicine), Respiratory infections < THORACIC MEDICINE                                                                                                                                                                                                                                           |
|                               |                                                                                                                                                                                                                                                                                                                                                                                        |

SCHOLARONE™  
Manuscripts

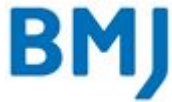

I, the Submitting Author has the right to grant and does grant on behalf of all authors of the Work (as defined in the below author licence), an exclusive licence and/or a non-exclusive licence for contributions from authors who are: i) UK Crown employees; ii) where BMJ has agreed a CC-BY licence shall apply, and/or iii) in accordance with the terms applicable for US Federal Government officers or employees acting as part of their official duties; on a worldwide, perpetual, irrevocable, royalty-free basis to BMJ Publishing Group Ltd ("BMJ") its licensees and where the relevant Journal is co-owned by BMJ to the co-owners of the Journal, to publish the Work in this journal and any other BMJ products and to exploit all rights, as set out in our [licence](#).

The Submitting Author accepts and understands that any supply made under these terms is made by BMJ to the Submitting Author unless you are acting as an employee on behalf of your employer or a postgraduate student of an affiliated institution which is paying any applicable article publishing charge ("APC") for Open Access articles. Where the Submitting Author wishes to make the Work available on an Open Access basis (and intends to pay the relevant APC), the terms of reuse of such Open Access shall be governed by a Creative Commons licence – details of these licences and which [Creative Commons](#) licence will apply to this Work are set out in our licence referred to above.

Other than as permitted in any relevant BMJ Author's Self Archiving Policies, I confirm this Work has not been accepted for publication elsewhere, is not being considered for publication elsewhere and does not duplicate material already published. I confirm all authors consent to publication of this Work and authorise the granting of this licence.

# Patient experience of measures to reduce risk of COVID-19: findings from a survey by the Asthma

## UK and British Lung Foundation Partnership

Authors: Keir EJ Philip<sup>1</sup>, Andrew Cumella<sup>2</sup>, Joe Farrington-Douglas<sup>2</sup>, Michael Laffan<sup>2</sup>, Nicholas S  
Hopkinson<sup>1,2</sup>,

<sup>1</sup>National Heart and Lung Institute, Imperial College London

<sup>2</sup>Asthma UK and British Lung Foundation Partnership

Corresponding Author: Dr Keir Philip

National Heart and Lung Institute

Imperial College London

Royal Brompton Hospital Campus, Fulham Rd

London SW3 6NP

[k.philip@imperial.ac.uk](mailto:k.philip@imperial.ac.uk)

ORCID iD: <https://orcid.org/0000-0001-9614-3580>

### Key Words:

Covid, respiratory, shielding, social distancing, long term condition, anxiety, loneliness

### Contribution

KEJP, AC, SM, ML, NSH developed the survey, KEJP performed the data analysis and wrote the first draft. All authors contributed to revisions of this first draft and approved the final version.

### Funding

KEJP was supported by the Imperial College Clinician Investigator Scholarship. The funders had no say in the design and conduct of the study; collection, management, analysis, and interpretation of

1  
2  
3 the data; preparation, review, or approval of the manuscript; and decision to submit the manuscript  
4  
5 for publication.  
6  
7

8 **Conflicts of interest**  
9

10  
11 The authors report no conflicts of interest.  
12  
13

14 **Word Count:** 1894  
15  
16  
17  
18  
19  
20  
21  
22  
23  
24  
25  
26  
27  
28  
29  
30  
31  
32  
33  
34  
35  
36  
37  
38  
39  
40  
41  
42  
43  
44  
45  
46  
47  
48  
49  
50  
51  
52  
53  
54  
55  
56  
57  
58  
59  
60

For peer review only

1  
2  
3 **ABSTRACT** (257 words)  
4  
5

6 **Objectives:** To assess the experience of people with long-term respiratory conditions regarding the  
7  
8 impact of measures to reduce risk of COVID-19.  
9

10  
11 **Design:** Analysis of data (n=9,515) from the Asthma UK British Lung Foundation partnership COVID-19  
12  
13 survey collected between 1<sup>st</sup> and 8<sup>th</sup> of April 2020.  
14  
15

16 **Setting:** Community  
17  
18

19 **Participants:** 9,515 people with self-reported long term respiratory conditions. 81% female, age  
20  
21 ranges from  $\leq 17$  years old to 80 and above, from all nations of the UK. Long term respiratory conditions  
22  
23 reported included asthma (83%), COPD (10%), bronchiectasis (4%), ILD (2%), and 'other' (<1%) (e.g.  
24  
25 lung cancer and pulmonary endometriosis).  
26  
27

28  
29 **Outcome measures:** Study responses related to impacts on key elements of health care, as well as  
30  
31 practical, psychological and social consequences related to the COVID-19 pandemic and social  
32  
33 distancing measures.  
34  
35

36 **Results:** 45% reported disruptions to care, including cancellations of appointments, investigations,  
37  
38 pulmonary rehabilitation, treatment, and monitoring. Other impacts such as difficulty accessing  
39  
40 healthcare services for other issues, and getting basic necessities such as food, were also common.  
41  
42 36% did not use online prescriptions and 54% had not accessed online inhaler technique videos. High  
43  
44 levels of psychosocial stress were reported including anxiety, loneliness and concerns about personal  
45  
46 health and family were prevalent. 81% reported engaging in physical activity. Among the 11% who  
47  
48 were smokers, 48% reported they were planning to quit smoking because of COVID-19.  
49  
50

51  
52 **Conclusions:** COVID-19 and related social distancing measures are having profound impacts on people  
53  
54 with chronic respiratory conditions. Urgent adaptation and signposting of services is required to  
55  
56 mitigate the negative health consequences of COVID-19 response for this group.  
57  
58  
59  
60

### Strengths and limitations of this study

- This is one of the first studies in the UK to highlight the impact of COVID-19 related measures on people with long term health conditions.
- The study includes a large sample (n=9515) from broad range of respiratory conditions, age groups, and parts of the UK.
- Key gaps in healthcare provision/access are identified; online prescription and inhaler technique videos; self-management plans; smoking cessation support.
- Although a range of individuals are represented, the sample has a large percentage of people with asthma (83%) and is predominantly female (81%).
- A lack of data regarding disease severity, and further demographic information of interest such as socio-economic status, ethnicity and housing, limits the depth of interpretation possible.

### INTRODUCTION

COVID-19 is a particular threat for people with long term respiratory conditions, who are at greater risk of serious disease and death if they become infected<sup>1-3</sup>. Recommendations for respiratory patients include being especially careful regarding social distancing measures to reduce SARS-CoV-2 transmission. In the UK, for the most vulnerable a period of “social shielding”, avoiding face-to-face contact has been advised<sup>4 5</sup>, with twin aims of protecting individuals from infection and avoiding a peak of cases in the most vulnerable which might overwhelm the health and social care system. Measures to reduce the immediate impact of COVID-19 are likely to have some adverse consequences for the population’s health and wellbeing<sup>6 7</sup>, leading to a so called ‘third wave’ of COVID-19 related

1  
2  
3 morbidity and mortality among people with long-term conditions<sup>8</sup>. This is of particular concern given  
4  
5 the substantial level of unmet need related to respiratory disease<sup>9-13</sup>.  
6  
7

8 Data on the experience of people with long term respiratory conditions regarding the impact of  
9  
10 COVID-19 prevention measures is currently lacking, but will be important for understanding of the  
11  
12 impacts on these people, and to help guide current and future provision to where it is required.  
13  
14  
15

## 16 17 18 **METHODS**

19  
20  
21 To assess the impact of measures to address COVID-19 on access to key elements of care<sup>14 15</sup> as well  
22  
23 as the practical, psychological and emotional consequences of the current situation, we analysed data  
24  
25 from an online survey carried out by the Asthma UK (AUK) and British Lung Foundation (BLF)  
26  
27 Partnership between 1<sup>st</sup> and 8<sup>th</sup> of April 2020. The survey was distributed via their mailing lists and  
28  
29 websites, and advertised on social media (Facebook, Twitter, Instagram and LinkedIn). Social  
30  
31 distancing measures were announced by the UK Government on 23<sup>rd</sup> March. The text of the survey is  
32  
33 available in the online supplement. Furthermore, during the data collection period, Public Health  
34  
35 England (PHE) recommendations relevant to survey respondents included 1) All members of the public  
36  
37 were advised to stay at home, only being permitted to leave the house for a small number of specific  
38  
39 reasons. 2) Shielding of “people with severe respiratory conditions including all cystic fibrosis, severe  
40  
41 asthma and severe COPD” who were advised to “stay at home at all times and avoid any face-to-face  
42  
43 contact for a period of at least 12 weeks”.  
44  
45  
46  
47  
48

49 The analysis presented focuses on questions relating to 1) Impacts on healthcare provision, 2) Social,  
50  
51 psychological and practical responses, and 3) Sources of support and information. Scales are out of  
52  
53 ten unless otherwise specified. These data were collected by AUK-BLF as part of routine information  
54  
55 gathering and marketing activities. All participants consented to their responses being published.  
56  
57 Anonymised data were shared with the authors for analysis. The Charity's information governance  
58  
59  
60



1  
2  
3 process supported this, consistent with GDPR, and additional external ethical approval was not  
4  
5 deemed necessary. Analyses were carried out using Stata V.14 (StataCorp). Data used here are not  
6  
7 being made publicly available.  
8  
9

### 10 **Patient and Public Involvement**

11  
12  
13 Patients and members of the public were not specifically involved in the design, conduct or reporting  
14  
15 of this research. However, as the primary focus of this research was to understand the impact of the  
16  
17 COVID-19 risk reduction measures on people living with long-term respiratory conditions.  
18  
19  
20  
21  
22

### 23 **RESULTS**

24  
25  
26 The initial survey data included 9,604 responses. After removing responses from people without a  
27  
28 lung condition (n=25); people who completed the survey twice within the sampling period (n=24 BLF,  
29  
30 n=21 AUK) and people who completed both surveys (n=19), the sample analysed included 9,515  
31  
32 individuals, 81% female, with age ranges from  $\leq 17$  years old to 80 and above. All nations of the UK  
33  
34 were represented. Reported lung diseases were: 83% asthma, 10% COPD, 4% bronchiectasis, 2% ILD,  
35  
36 and <1% 'other' for example lung cancer and pulmonary endometriosis (Table 1). Of people who  
37  
38 completed the AUK survey, 28.25% (2,179) reported having 'difficult' 'severe' or 'brittle' asthma. 32%  
39  
40 of respondents with non-asthma diagnoses were severely breathless (MRC dyspnoea score  $\geq 4$ ). Data  
41  
42 presented are a combination of responses to the BLF and AUK surveys which contributed 1,787 and  
43  
44 7,728 respectively. Where the sum of total answers given is less than 9,515 this is due to non-response  
45  
46 to that specific question.  
47  
48  
49  
50  
51

### 52 **Impacts on Healthcare provision**

53  
54  
55 Despite data collection occurring relatively early in the first wave of the UK pandemic 45% reported  
56  
57 disruptions in healthcare provision, including GP and hospital appointment cancellations effecting 10%  
58  
59 and 8% of respondents respectively, with 31% reporting having appointments conducted remotely  
60

1  
2  
3 (e.g. by phone) (Table 2). Respondents reported various additional ways in which healthcare provision  
4 had been impacted by COVID-19 (under the option 'other'), including cancelled operations,  
5 investigations, respiratory nurse appointments, and medication reviews. In addition, finding it difficult  
6 to get in contact with relevant care providers for advice and information. Despite being a population  
7 with online access, one third did not access online prescriptions and over half had not used online  
8 inhaler technique videos. Among the 11% who were smokers, 48% reported they were planning to  
9 quit smoking because of COVID-19. A majority of individuals did not have a written self-management  
10 plan despite the strong evidence base for this intervention<sup>15 16</sup>.

11  
12 Reassuringly respondents reported high levels of physical activity, with 81% being 'able to keep active  
13 or do exercise at home' (Table 2). Frequently reported activities include walks (47%), housework  
14 (54%), gardening (29%), Yoga (12%), running (7%) and cycling (6%). In addition to the activities stated  
15 684 respondents reported 'other' activities including home exercise bikes, trampolining, tennis,  
16 weights, skipping, home PR, Pilates, YouTube exercise videos, Zumba/dance and Wii fit.

### 17 18 19 20 21 22 23 24 25 26 27 28 29 30 31 32 33 34 35 36 37 **Social and psychological responses**

38  
39 High levels of anxiety about COVID-19 were reported; mean(SD) anxiety level 8.03(2.07); slightly  
40 higher in women than men, 8.13(1.99) vs 7.55(2.28), and decreasing slightly with age (Figure 1). Only  
41 34% of men and 24% of women felt that they were 'coping well'. Older age groups were more likely  
42 to report coping well with 47% of 70 to 79-year olds, steadily decreasing to 17% in the 18 to 29 years  
43 old group. Respondent had various concerns, most commonly reported being 'concern about lung  
44 condition' (64%), and concern about family (61%). Interestingly, both showing similar variations  
45 related to age and gender as that seen in anxiety and 'coping well', with a higher percentage of  
46 females, and younger people reporting concerns.  
47  
48  
49  
50  
51  
52  
53  
54  
55  
56  
57  
58  
59  
60

1  
2  
3 The majority (87%) of respondents lived with another person; 51% felt they lacked companionship  
4  
5 'some of the time' or 'often', and 52% reported feeling left out of things 'some of the time' or 'often'.  
6  
7 66% of respondents felt 'isolated from others'. Combining the scores for these three statements  
8  
9 (modified 3 item UCLA loneliness score),<sup>17</sup> 3 being the lowest score for loneliness and 9 the highest,  
10  
11 the mean loneliness rating was 5.12(1.80), with broadly similar levels in women and men 5.21(1.81)  
12  
13 vs 4.74(1.72) and no substantial differences between age groups or disease type (Online Table E1).  
14  
15

16  
17 Of note, responses in those actively shielding, and not actively shielding were broadly similar. 19.54%  
18  
19 had received the government letter or text message advising them to shield, of whom 98% were doing  
20  
21 so. Mean perceived preparedness for COVID-19 was 6.41(1.7), with no substantial differences related  
22  
23 to gender, age, or diagnosis.  
24  
25

### 26 27 28 29 30 **Sources of support and Information**

31  
32 Respondents reported having accessed various services to address concerns about coronavirus or its  
33  
34 symptoms. These included NHS 111 online (19%) which was used more commonly by younger adults  
35  
36 (23 to 25% of under 40-year olds, compared with 3 to 9% of over 60 years old, despite the surveys  
37  
38 being online suggesting computer literacy of all respondents. GPs had been used by 26% of  
39  
40 respondents, again with a trend toward decreasing use in older age groups. The NHS 111 telephone  
41  
42 service had been used by 8% of respondents with a similar decrease in use by older age groups.  
43  
44 Though differences in condition are seen this is likely due to certain conditions being more  
45  
46 represented in certain age groups. For example, the same trends regarding age and NHS 111 online  
47  
48 use were seen when asthma was considered alone. Only 1% of respondents reported using A&E, with  
49  
50 no substantial differences related to gender, age, or diagnosis. 55% of respondents reported not  
51  
52 having used 'any resources due to coronavirus or concerns about its symptoms'. Reporting to not have  
53  
54 used resources was more common in older than younger adults. As might be expected, higher  
55  
56  
57  
58  
59  
60

1  
2  
3 percentages of respondents in working age groups were concerned about their financial situation due  
4  
5 to missed work.  
6  
7

8 Respondents made use of various sources for information on coronavirus, the most commonly  
9  
10 reported being television (73%), news websites (50%), and (non-BLF/AUK) social media (25%). Less  
11  
12 commonly reported sources of information on coronavirus include BLF/AUK websites (17%) and social  
13  
14 media (14%), radio (12%) and friends and family (8%) (See Online Table E2 for further responses about  
15  
16 practical preparedness for COVID-19).  
17  
18

19  
20 Respondents were particularly interested in having more information about how to manage their lung  
21  
22 condition during in relation to coronavirus (65%), decisions they may need to make if they were to get  
23  
24 ill with COVID-19 (49%), and how to look after their mental health (31%).  
25  
26  
27  
28  
29

### 30 **Practical difficulties**

31  
32  
33 Multiple difficulties were experienced by respondents regarding health impacting practical issues. 22%  
34  
35 reported difficulties accessing groceries, while 7% had difficulties accessing prescriptions (Online Table  
36  
37 E2)  
38  
39  
40  
41  
42  
43  
44  
45

## 46 **DISCUSSION**

47  
48  
49 COVID-19 is having significant impacts on individuals with respiratory disease, generating high levels  
50  
51 of anxiety and concerns about potential impacts on respondents and their families, compounded by  
52  
53 social isolation and loneliness. In addition many aspects of care have been cancelled or deferred,  
54  
55 including pulmonary rehabilitation and severe asthma appointments in secondary and tertiary, care,  
56  
57 on a background of provision that was already failing to meet the needs of many people<sup>9 10</sup>, with  
58  
59  
60

1  
2  
3 impacts evident despite relatively recent introduction of distancing measures. Respondents were  
4  
5 clearly making an effort to engage in physical activity despite the challenging nature of the situation.  
6  
7

8 Despite the requirement for physical distancing, social isolation and loneliness can still be avoided, or  
9  
10 reduced, through targeted support and intervention. There is growing evidence that COVID-19  
11  
12 disproportionately effects more deprived groups<sup>18</sup>. Isolation strategies are also likely to impact most  
13  
14 heavily on the most disadvantaged individuals with the least economic and social capital.  
15  
16

17  
18 A key practical issue is that nearly half the respondents who smoke tobacco reported that they  
19  
20 intended to quit due to COVID-19. It will be important to ensure that there is provision of appropriate  
21  
22 accessible smoking cessation support services, to maximise their chance of success both to reduce the  
23  
24 occurrence of smoking related disease generally<sup>19</sup> and to reduce individuals' risk from COVID-19  
25  
26 specifically<sup>120</sup>. In addition, encouraging uptake of online prescriptions and directing patients to online  
27  
28 resources including inhaler technique videos to support self-management, as recommended in the  
29  
30 NICE COVID-19 COPD Rapid Guideline Update (NG168)<sup>21</sup>, should be prioritised.  
31  
32

33  
34 The study sample includes representation from a wide age range, a variety of respiratory conditions,  
35  
36 and all countries of the UK, but some limitations exist. More detail about disease severity would have  
37  
38 been useful for interpreting responses, as this impacts government guidance regarding distancing and  
39  
40 shielding measures. The study was online so results may not be representative for digitally excluded  
41  
42 individuals.  
43  
44

## 45 46 **CONCLUSION**

47  
48 Measures to reduce the risk of COVID-19 are having profound impacts on people with lung disease  
49  
50 including widespread disruption to fundamental components of healthcare services, high levels of  
51  
52 anxiety and loneliness. There is an urgent need to adapt services to address these needs and improve  
53  
54 signposting of individuals to existing resources, in order to mitigate negative health consequences,  
55  
56 and provide appropriate care to this vulnerable group.  
57  
58  
59  
60

## Acknowledgements

The authors would like to thank respondents for completing the survey.

## Transparency statement

Dr Keir Philip affirms that this manuscript is an honest, accurate, and transparent account of the study being reported; that no important aspects of the study have been omitted; and that any discrepancies from the study as planned (and, if relevant, registered) have been explained.

**Table 1: Participant Characteristics**

|                                                    | Asthma<br>n=7975 | Chronic respiratory disease<br>(non-asthma)<br>n=1541 |
|----------------------------------------------------|------------------|-------------------------------------------------------|
| Age group                                          |                  |                                                       |
| 17 and under                                       | 5.54 % (439)     | 0.33 % (5)                                            |
| 18 to 29                                           | 12.11 % (959)    | 0.59 % (9)                                            |
| 30 to 39                                           | 24.68 % (1,955)  | 1.90 % (29)                                           |
| 40 to 49                                           | 30.60 % (2,424)  | 8.93 % (136)                                          |
| 50 to 59                                           | 18.67 % (1,479)  | 21.47 % (327)                                         |
| 60 to 69                                           | 6.26 % (496)     | 37.82 % (576)                                         |
| 70 to 79                                           | 1.94 % (154)     | 25.21 % (384)                                         |
| 80 and above                                       | 0.19 % (15)      | 3.74 % (57)                                           |
| Gender (%Female)                                   | 82.92 % (6,562)  | 74.67 % (1,141)                                       |
| Country                                            |                  |                                                       |
| England                                            | 75.35 % (5,981)  | 83.33 % (1,275)                                       |
| Scotland                                           | 13.03 % (1,034)  | 9.54 % (146)                                          |
| Wales                                              | 7.19 % (571)     | 5.23 % (80)                                           |
| Northern Ireland                                   | 4.43 % (352)     | 1.90 % (29)                                           |
| Influenza immunisation<br>2019/20                  |                  |                                                       |
| Yes                                                | 77.10 % (6,139)  | 89.96 % (1,380)                                       |
| No                                                 | 22.54 % (1,795)  | 9.97 % (153)                                          |
| Don't know                                         | 0.35 % (28)      | 0.07 % (1)                                            |
| Current smoking                                    |                  |                                                       |
| Non-smoker                                         | 89.41 % (7,115)  | 86.07 % (1,322)                                       |
| Smoker                                             | 10.59 % (843)    | 13.93 % (214)                                         |
| Of smokers -                                       |                  |                                                       |
| Intending to quit smoking due<br>to COVID-19       | 49.11 % (414)    | 64.48 % (138)                                         |
| Not intending quit smoking<br>due to COVID-19      | 50.89 % (429)    | 35.51 % (76)                                          |
| Shielding                                          |                  |                                                       |
| Actively shielding                                 | 68.66 % (5,461)  | 89.97 % (1,381)                                       |
| Not actively shielding                             | 31.34 % (2,493)  | 10.30 % (154)                                         |
| Self-isolating                                     |                  |                                                       |
| Currently self-isolating                           | 67.81 % (5,403)  | 88.01 % (1,350)                                       |
| Not currently self-isolating                       | 32.19 % (2,565)  | 11.99 % (184)                                         |
| Current COVID-19 Symptoms<br>'Yes'                 | 6.89 % (549)     | 3.07 % (47)                                           |
| Current COVID-19 Symptoms<br>'Not sure'            | 3.99 % (318)     | 3.78 % (58)                                           |
| Following self-isolation advice<br>due to symptoms | 92.81 % (800)    | 98.04 % (100)                                         |
| Not following self-isolation<br>advice             | 7.19 % (62)      | 1.96 % (2)                                            |
| Diagnosis                                          |                  |                                                       |

|                |                 |
|----------------|-----------------|
| Asthma         | 83.81 % (7,975) |
| COPD           | 10.12 % (963)   |
| Bronchiectasis | 3.81 % (363)    |
| ILD            | 1.78 % (169)    |
| Other          | 0.48 % (46)     |
|                |                 |

**Table 2: Impact of COVID-19 related measures on chronic disease healthcare provision and self-management**

| Component of disease management                         | Percentage | Number of observations |
|---------------------------------------------------------|------------|------------------------|
| <b>Health service provision</b>                         |            |                        |
| GP appointment cancelled                                | 9.69 %     | 922                    |
| Hospital appointment cancelled                          | 7.83 %     | 745                    |
| GP phone/remote appointment                             | 30.93 %    | 2,944                  |
| Some form of cancellation or change in service delivery | 44.86 %    | 4,270                  |
|                                                         |            |                        |
| <b>Of those who do PR (n=553)</b>                       |            |                        |
| Doing PR at home                                        | 24.77 %    | 137                    |
| PR cancelled                                            | 24.23 %    | 134                    |
|                                                         |            |                        |
| Have enough medications                                 | 93.41 %    | 8,871                  |
| Have online prescriptions                               | 64.38 %    | 6,112                  |
| Have a written self-management plan for their condition | 39.56 %    | 3,756                  |
| Have watched online inhaler videos                      |            |                        |
| Yes                                                     | 44.11 %    | 4,190                  |
| No                                                      | 53.57 %    | 5,089                  |
| Don't use inhalers                                      | 2.33 %     | 221                    |
|                                                         |            |                        |
| <b>Physical activity</b>                                |            |                        |
| Able to 'keep active' or do exercise at home            | 81.02 %    | 7,682                  |
| Not able to 'keep active' or do exercise at home        | 18.92 %    | 1,800                  |
| Type of activity                                        |            |                        |
| Walks                                                   | 47.05 %    | 4,478                  |
| Cycling                                                 | 6.43 %     | 612                    |
| Run                                                     | 7.17 %     | 682                    |
| Yoga                                                    | 12.03 %    | 1,145                  |
| Gardening                                               | 29.06 %    | 2,817                  |
| Housework                                               | 54.16 %    | 5,155                  |



## REFERENCES

1. Mehra MR, Desai SS, Kuy S, et al. Cardiovascular Disease, Drug Therapy, and Mortality in Covid-19. *New England Journal of Medicine* 2020 doi: 10.1056/NEJMoa2007621
2. Docherty AB, Harrison EM, Green CA, et al. Features of 20 133 UK patients in hospital with covid-19 using the ISARIC WHO Clinical Characterisation Protocol: prospective observational cohort study. *BMJ* 2020;369:m1985. doi: 10.1136/bmj.m1985
3. Mehra MR, Desai SS, Ruschitzka F, et al. Hydroxychloroquine or chloroquine with or without a macrolide for treatment of COVID-19: a multinational registry analysis. *The Lancet* doi: 10.1016/S0140-6736(20)31180-6
4. Kmietowicz Z. Covid-19: Highest risk patients are asked to stay at home for 12 weeks. *Bmj* 2020;368:m1170. doi: 10.1136/bmj.m1170 [published Online First: 2020/03/25]
5. Public Health England. Guidance on shielding and protecting people defined on medical grounds as extremely vulnerable from COVID-19 2020 [updated 30/03/2020. Available from: <https://www.gov.uk/government/publications/guidance-on-shielding-and-protecting-extremely-vulnerable-persons-from-covid-19/guidance-on-shielding-and-protecting-extremely-vulnerable-persons-from-covid-19> accessed 09/04/2020 2020.
6. Steptoe A, Shankar A, Demakakos P, et al. Social isolation, loneliness, and all-cause mortality in older men and women. *Proceedings of the National Academy of Sciences of the United States of America* 2013;110(15):5797-801. doi: 10.1073/pnas.1219686110
7. Bu F, Philip K, Fancourt D. Social isolation and loneliness as risk factors for hospital admissions for respiratory disease among older adults. *Thorax* 2020 doi: 10.1136/thoraxjnl-2019-214445 [published Online First: 2020/04/23]
8. Douglas M, Katikireddi SV, Taulbut M, et al. Mitigating the wider health effects of covid-19 pandemic response. *BMJ* 2020;369:m1557. doi: 10.1136/bmj.m1557

- 1  
2  
3 9. Elbehairy AF, Quint JK, Rogers J, et al. Patterns of breathlessness and associated consulting  
4  
5 behaviour: results of an online survey. *Thorax* 2019;74(8):814-17. doi: 10.1136/thoraxjnl-  
6  
7 2018-212950  
8  
9
- 10 10. Philip K, Gaduzo S, Rogers J, et al. Patient experience of COPD care: outcomes from the British  
11  
12 Lung Foundation Patient Passport. *BMJ Open Respiratory Research* 2019;6(1):e000478. doi:  
13  
14 10.1136/bmjresp-2019-000478  
15
- 16 11. Kelly JL, Elkin SL, Fluxman J, et al. Breathlessness and skeletal muscle weakness in patients  
17  
18 undergoing lung health screening in primary care. *Copd* 2013;10(1):40-54. doi:  
19  
20 10.3109/15412555.2012.727923 [published Online First: 2013/01/01]  
21  
22
- 23 12. Nacul L, Soljak M, Samarasundera E, et al. COPD in England: a comparison of expected, model-  
24  
25 based prevalence and observed prevalence from general practice data. *J Public Health (Oxf)*  
26  
27 2011;33(1):108-16. doi: 10.1093/pubmed/fdq031 [published Online First: 2010/06/05]  
28  
29
- 30 13. Steiner MC, Lowe D, Beckford K, et al. Socioeconomic deprivation and the outcome of pulmonary  
31  
32 rehabilitation in England and Wales. *Thorax* 2017;72(6):530-37. doi: 10.1136/thoraxjnl-2016-  
33  
34 209376  
35
- 36 14. Hopkinson NS, Molyneux A, Pink J, et al. Chronic obstructive pulmonary disease: diagnosis and  
37  
38 management: summary of updated NICE guidance. *BMJ* 2019;366:l4486. doi:  
39  
40 10.1136/bmj.l4486  
41  
42
- 43 15. White J, Paton JY, Niven R, et al. Guidelines for the diagnosis and management of asthma: a look  
44  
45 at the key differences between BTS/SIGN and NICE. *Thorax* 2018;73(3):293-97. doi:  
46  
47 10.1136/thoraxjnl-2017-211189  
48  
49
- 50 16. Zwerink M, Kerstjens HA, Palen J, et al. (Cost-)effectiveness of self-treatment of exacerbations in  
51  
52 patients with COPD: 2 years follow-up of a RCT. *Respirology* 2016;21(3):497-503. doi:  
53  
54 doi:10.1111/resp.12697  
55  
56  
57  
58  
59  
60

- 1  
2  
3 17. Hughes ME, Waite LJ, Hawkey LC, et al. A Short Scale for Measuring Loneliness in Large Surveys:  
4  
5 Results From Two Population-Based Studies. *Research on aging* 2004;26(6):655-72. doi:  
6  
7 10.1177/0164027504268574  
8  
9  
10 18. Rose TC, Mason K, Pennington A, et al. Inequalities in COVID19 mortality related to ethnicity and  
11  
12 socioeconomic deprivation. *medRxiv* 2020:2020.04.25.20079491. doi:  
13  
14 10.1101/2020.04.25.20079491  
15  
16 19. Royal College of Physicians. Hiding in plain sight: Treating tobacco dependency in the NHS  
17  
18 [https://www.rcplondon.ac.uk/projects/outputs/hiding-plain-sight-treating-tobacco-  
20 dependency-nhs](https://www.rcplondon.ac.uk/projects/outputs/hiding-plain-sight-treating-tobacco-<br/>19 dependency-nhs), 2018.  
21  
22  
23 20. Hopkinson NS, Rossi N, El-Sayed Moustafa J, et al. Current tobacco smoking and risk from COVID-  
24  
25 19: results from a population symptom app in over 2.4 million people. *medRxiv*  
26  
27 2020:2020.05.18.20105288. doi: 10.1101/2020.05.18.20105288  
28  
29  
30 21. National Institute for Clinical Excellence. COVID-19 rapid guideline: community-based care of  
31  
32 patients with chronic obstructive pulmonary disease (COPD). Available from:  
33  
34 <https://www.nice.org.uk/guidance/ng168> 2020  
35  
36  
37  
38  
39  
40  
41  
42  
43  
44  
45  
46  
47  
48  
49  
50  
51  
52  
53  
54  
55  
56  
57  
58  
59  
60

Figure 1: A bar chart of median anxiety level by age group

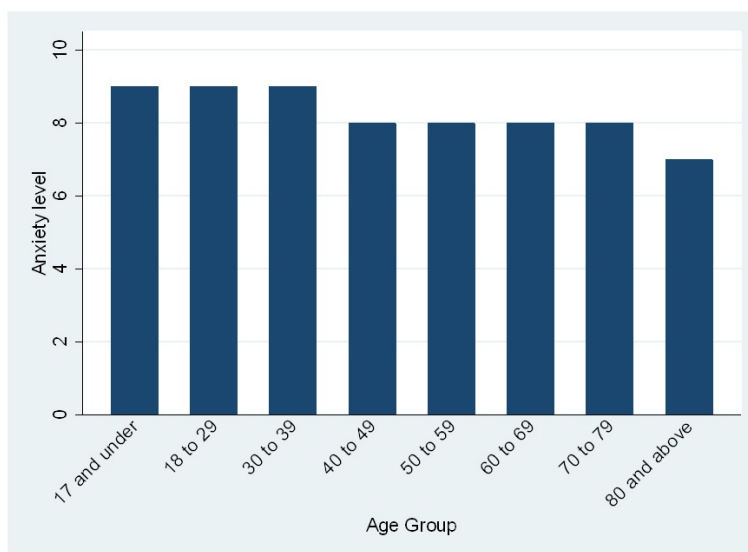

We conducted the Kruskal-Wallis H test to determine if there is a statistically significant difference between anxiety levels in different age groups. This test was selected due to the marked left shift in the data. Sample sizes in each group are reported in table 2. This test demonstrated statistically significant differences between groups (chi-squared = 158.895 with 7 d.f., probability = 0.0001).

1  
2  
3 **Patient experience of measures to reduce risk of COVID-19: findings from a survey by the Asthma**

4  
5 **UK and British Lung Foundation Partnership – ONLINE SUPPLEMENT**

6  
7  
8 Authors: Keir EJ Philip<sup>1</sup>, Andrew Cumella<sup>2</sup>, Sarah MacFadyen<sup>2</sup>, Michael Laffan<sup>2</sup>, Nicholas S

9  
10 Hopkinson<sup>1,2</sup>,

11  
12  
13 <sup>1</sup>National Heart and Lung Institute, Imperial College London

14  
15 <sup>2</sup>Asthma UK and British Lung Foundation Partnership

16  
17  
18 Corresponding Author: Dr Keir Philip

19  
20  
21 National Heart and Lung Institute

22  
23 Imperial College London

24  
25 Royal Brompton Hospital Campus

26  
27 Fulham Rd

28  
29 London SW3 6NP

30  
31 [k.philip@imperial.ac.uk](mailto:k.philip@imperial.ac.uk)

**SURVEY QUESTIONS:**

1  
2  
3  
4  
5 What is your age?

6  
7 What is your gender?

8  
9 What nation do you live in?

10  
11 Have you ever been told that you have 'difficult', 'brittle' or 'severe' asthma? (AUK survey only)

12  
13 What is your main lung diagnosis?

14  
15 Do you receive pulmonary rehabilitation as part of your care?

16  
17 When do you get out of breath? (MRC dyspnoea scale options) (BLF survey only)

18  
19 Are you currently following the government's 'shielding' advice?

20  
21 Have you received a letter or text message advising you to shield?

22  
23 Did you have the flu jab this winter?

24  
25 Have you seen guidance or advice on coronavirus from Asthma UK or the British Lung Foundation?

26  
27 How did you see this advice?

28  
29 Where do you mainly get your information about coronavirus?

30  
31 the NHS?

32  
33 What was it about the advice you saw that wasn't helpful?

34  
35 healthcare professionals?

36  
37 What was it about the advice you saw that wasn't helpful?

38  
39 charities?

40  
41 What was it about the advice you saw that wasn't helpful?

42  
43 the Government?

44  
45 What was it about the advice you saw that wasn't helpful?

46  
47 Would you like more information on any of the following during the coronavirus outbreak?

48  
49 Are you currently suffering from any coronavirus symptoms?

50  
51 Are you following isolation advice?

52  
53 How confident are you about following advice to self-isolate or shield?

54  
55 How confident are you that you will be able to access food and other provisions if you have to self-isolate or shield?

56  
57 Do you have enough medicines for your needs at the moment?

58  
59 Are you registered to order prescriptions online from your GP?

60  
Have you had a look at online inhaler technique videos to check that you are using your inhalers properly?

1  
2  
3 Do you have a written self-management plan for your condition?  
4

5 In general, how well prepared do you feel for coronavirus?  
6

7 In general, how anxious do you feel about coronavirus?  
8

9 Which of the following apply to you?

- 10  
11 - I'm concerned about my lung condition  
12 - I'm concerned about the health of my family members  
13 - I'm coping well  
14 - I'm having trouble getting groceries  
15 - I'm worried about my financial situation due to missed work  
16 - I can't get the prescriptions I need  
17 - None of the above  
18 - Other  
19  
20

21 Have you used any of these services due to coronavirus, or concerns about its symptoms?  
22

- 23 - NHS 111 (online checker)  
24 - NHS 111 (telephone advice)  
25 - GP  
26 - Pharmacy  
27 - A&E  
28 - BLF or AUK nurse phone  
29 - Other  
30  
31

32 Has any of the following happened to you because of the way the NHS is working at the moment?  
33

- 34 - I have had to have a GP appointment conducted over the phone / remotely  
35 - My regular care for my lung condition at the hospital has been cancelled  
36 - My regular care for my lung condition at the GP has been cancelled  
37 - Pulmonary rehabilitation classes were cancelled  
38 - I have had to do pulmonary rehabilitation exercises at home  
39 - None of the above  
40 - Other  
41  
42

43 Are you able to perform your job at home?  
44

45 How supportive have your workplace been during the coronavirus outbreak?  
46

47 Are you keeping physically active, or are able to do any exercise at home?  
48

49 Which of the following are you doing to stay active while at home?

- 50 - Housework  
51 - Gardening  
52 - Going on walks  
53 - Yoga  
54 - Cycling  
55 - Running  
56 - Other  
57  
58

59 If you smoke, are you planning to try to quit smoking to protect yourself from coronavirus?  
60

1  
2  
3 Are you actively self-isolating due to coronavirus?  
4

5 Do you live alone?  
6

7 How often do you feel you lack companionship?  
8

9 How often do you feel left out of things?  
10

11 How often do you feel isolated from others?  
12  
13  
14  
15  
16  
17  
18  
19  
20  
21  
22  
23  
24  
25  
26  
27  
28  
29  
30  
31  
32  
33  
34  
35  
36  
37  
38  
39  
40  
41  
42  
43  
44  
45  
46  
47  
48  
49  
50  
51  
52  
53  
54  
55  
56  
57  
58  
59  
60

For peer review only



**Table E1: Loneliness, Isolation, Anxiety, and Concerns**

|                                                   | Percentage       | Number of observations |
|---------------------------------------------------|------------------|------------------------|
| <b>Domestic Isolation</b>                         |                  |                        |
| Live alone                                        | 13.06 %          | 1,241                  |
| Does not live alone                               | 86.94 %          | 8,260                  |
| <b>Loneliness</b>                                 |                  |                        |
| Feels lacks companionship                         |                  |                        |
| Hardly ever                                       | 48.91 %          | 4,643                  |
| Some of the time                                  | 39.84 %          | 3,782                  |
| Often                                             | 11.25 %          | 1,068                  |
| Feels left out of things                          |                  |                        |
| Hardly ever                                       | 46.73 %          | 4,434                  |
| Some of the time                                  | 40.84 %          | 3,875                  |
| Often                                             | 12.43 %          | 1,179                  |
| Feels isolated from others                        |                  |                        |
| Hardly ever                                       | 34.34 %          | 3,261                  |
| Some of the time                                  | 47.21 %          | 4,483                  |
| Often                                             | 18.45 %          | 1,752                  |
|                                                   | <b>Mean (SD)</b> | <b>N</b>               |
| <b>Overall loneliness score (all respondents)</b> |                  |                        |
|                                                   | 5.12 (1.80)      | 9,458                  |
| Loneliness by gender                              |                  |                        |
| Male                                              | 4.74 (1.72)      | 1,728                  |
| Female                                            | 5.21 (1.81)      | 7,652                  |
| Loneliness by age                                 |                  |                        |
| 17 and under                                      | 4.81 (1.68)      | 441                    |
| 18 to 29                                          | 5.65 (1.84)      | 962                    |
| 30 to 39                                          | 5.20 (1.82)      | 1,978                  |
| 40 to 49                                          | 4.96(1.78)       | 2,550                  |
| 50 to 59                                          | 5.00 (1.75)      | 1,794                  |
| 60 to 69                                          | 5.24 (1.83)      | 1,064                  |
| 70 to 79                                          | 5.03 (1.74)      | 532                    |
| 80 and above                                      | 5.26 (1.79)      | 69                     |
| Loneliness by main diagnosis                      |                  |                        |
| Asthma                                            | 5.06 (1.79)      | 7,936                  |
| COPD                                              | 5.56 (1.85)      | 957                    |
| Bronchiectasis                                    | 5.18(1.71)       | 357                    |
| ILD                                               | 5.54 (1.92)      | 163                    |
| Other                                             | 5.40 (1.84)      | 45                     |
| Loneliness by shielding                           |                  |                        |
| Actively shielding                                | 5.23 (1.81)      | 6,804                  |
| Not actively shielding                            | 4.85 (1.74)      | 2,654                  |
| <b>Anxiety</b>                                    |                  |                        |
| How anxious do you feel? (1-10)                   | 8.03 (2.07)      | 9,495                  |
| Anxiety by gender                                 |                  |                        |

|                             |                                |             |       |
|-----------------------------|--------------------------------|-------------|-------|
|                             | Male                           | 7.55 (2.28) | 1,728 |
|                             | Female                         | 8.13 (1.99) | 7,691 |
| <b>Anxiety by age</b>       |                                |             |       |
|                             | 17 and under                   | 8.14 (2.11) | 442   |
|                             | 18 to 29                       | 8.23 (1.90) | 967   |
|                             | 30 to 39                       | 8.24 (1.97) | 1,981 |
|                             | 40 to 49                       | 8.14 (1.96) | 2,558 |
|                             | 50 to 59                       | 8.00 (2.11) | 1,803 |
|                             | 60 to 69                       | 7.60 (2.27) | 1,066 |
|                             | 70 to 79                       | 7.32 (2.18) | 536   |
|                             | 80 and above                   | 7.03 (2.33) | 72    |
| <b>Anxiety by diagnosis</b> |                                |             |       |
|                             | Asthma                         | 8.11 (2.01) | 7,959 |
|                             | COPD                           | 7.57 (2.31) | 960   |
|                             | Bronchiectasis                 | 7.64 (2.14) | 362   |
|                             | ILD                            | 7.51 (2.24) | 168   |
|                             | Other                          | 7.76 (2.23) | 46    |
|                             | Actively shielding             | 8.06 (2.08) | 6,829 |
|                             | Not actively shielding         | 7.94 (2.03) | 2,666 |
| <b>Feels coping well</b>    |                                | 25.90 %     | 2,465 |
| <b>By Gender</b>            |                                |             |       |
|                             | Male                           | 34.39 %     | 596   |
|                             | Female                         | 23.96 %     | 1,844 |
| <b>By Age</b>               |                                |             |       |
|                             | 17 and under                   | 22.97 %     | 102   |
|                             | 18 to 29                       | 17.46 %     | 169   |
|                             | 30 to 39                       | 19.20 %     | 381   |
|                             | 40 to 49                       | 24.38 %     | 624   |
|                             | 50 to 59                       | 26.74 %     | 483   |
|                             | 60 to 69                       | 37.50 %     | 402   |
|                             | 70 to 79                       | 47.21 %     | 254   |
|                             | 80 and above                   | 45.83 %     | 33    |
| <b>By diagnosis</b>         |                                |             |       |
|                             | Asthma                         | 24.33 %     | 1,940 |
|                             | COPD                           | 34.79 %     | 335   |
|                             | Bronchiectasis                 | 31.96 %     | 116   |
|                             | ILD                            | 34.91 %     | 59    |
|                             | Other                          | 32.61 %     | 15    |
|                             | Bronchiectasis                 | 8.26 %      | 30    |
|                             | ILD                            | 12.43 %     | 21    |
|                             | Other                          | 13 %        | 6     |
| <b>Concerns</b>             |                                |             |       |
|                             | Concerned about lung condition | 64.25 %     | 6,115 |

|                                                        |         |       |
|--------------------------------------------------------|---------|-------|
| By Gender                                              |         |       |
| Male                                                   | 57.24 % | 992   |
| Female                                                 | 65.88 % | 5075  |
| By Age                                                 |         |       |
| 17 and under                                           | 41.22 % | 183   |
| 18 to 29                                               | 73.14 % | 708   |
| 30 to 39                                               | 71.47 % | 1,418 |
| 40 to 49                                               | 68.71 % | 1,759 |
| 50 to 59                                               | 62.24 % | 1,124 |
| 60 to 69                                               | 54.76 % | 587   |
| 70 to 79                                               | 48.14 % | 259   |
| 80 and above                                           | 50.00 % | 36    |
| By diagnosis                                           |         |       |
| Asthma                                                 | 64.94 % | 5,179 |
| COPD                                                   | 56.80 % | 547   |
| Bronchiectasis                                         | 67.77 % | 246   |
| ILD                                                    | 66.86 % | 113   |
| Other                                                  | 65.22 % | 30    |
| Concerned about family                                 | 61.50 % | 5,854 |
| By Gender                                              |         |       |
| Male                                                   | 54.99 % | 953   |
| Female                                                 | 63.03 % | 4,855 |
| By Age                                                 |         |       |
| 17 and under                                           | 60.36 % | 268   |
| 18 to 29                                               | 65.91 % | 638   |
| 30 to 39                                               | 66.33 % | 1,316 |
| 40 to 49                                               | 64.02 % | 1,639 |
| 50 to 59                                               | 60.24 % | 1,088 |
| 60 to 69                                               | 53.82 % | 1,072 |
| 70 to 79                                               | 47.21 % | 538   |
| 80 and above                                           | 38.89 % | 72    |
| By diagnosis                                           |         |       |
| Asthma                                                 | 63.32 % | 5,050 |
| COPD                                                   | 51.40 % | 495   |
| Bronchiectasis                                         | 53.72 % | 195   |
| ILD                                                    | 49.11 % | 83    |
| Other                                                  | 67.39 % | 31    |
| Concerned about financial situation due to missed work | 18.61 % | 1,771 |
| By Gender                                              |         |       |
| Male                                                   | 18.58 % | 322   |
| Female                                                 | 18.64 % | 1,436 |
| By Age                                                 |         |       |

|  |                |         |       |
|--|----------------|---------|-------|
|  | 17 and under   | 13.51 % | 60    |
|  | 18 to 29       | 26.96 % | 261   |
|  | 30 to 39       | 22.73 % | 451   |
|  | 40 to 49       | 22.50 % | 576   |
|  | 50 to 59       | 18.72 % | 338   |
|  | 60 to 69       | 6.62 %  | 71    |
|  | 70 to 79       | 0.74 %  | 4     |
|  | 80 and above   | 1.39 %  | 1     |
|  |                |         |       |
|  |                |         |       |
|  | By diagnosis   |         |       |
|  | Asthma         | 20.43 % | 1,629 |
|  | COPD           | 8.83 %  | 85    |
|  | Bronchiectasis | 8.26 %  | 30    |
|  | ILD            | 12.43 % | 21    |
|  | Other          | 13 %    | 6     |

Table E2: Practical Preparedness

|                                                                 | Percentage  | Number of observations |
|-----------------------------------------------------------------|-------------|------------------------|
| <b>Sources of Information</b>                                   |             |                        |
| <b>Government Letter</b>                                        |             |                        |
| Has received                                                    | 19.54 %     | 1,855                  |
| Has not received                                                | 78.98 %     | 7,498                  |
| Does not know                                                   | 1.49 %      | 141                    |
| Actively shielding of those who have received government letter | 97.83 %     | 1,804                  |
| <b>Main sources of COVID info</b>                               |             |                        |
| TV                                                              | 72.98 %     | 6,946                  |
| Radio                                                           | 11.56 %     | 1,100                  |
| New websites                                                    | 50.34 %     | 4,791                  |
| AUK/BLF website                                                 | 17.49 %     | 1,665                  |
| AUK/BLF social media                                            | 14.36 %     | 1,367                  |
| Other social media                                              | 24.85 %     | 2,365                  |
| Friends and Family                                              | 8.34 %      | 794                    |
| <b>Would like more information on:</b>                          |             |                        |
| Symptoms                                                        | 35.26 %     | 3,356                  |
| How to help their community                                     | 6.60 %      | 628                    |
| Financial help                                                  | 14.57 %     | 1,387                  |
| Decisions possibly required if a person I care for gets ill     | 28.20 %     | 2,684                  |
| Decisions possibly required if I get ill                        | 48.95 %     | 4,659                  |
| How to manage my lung condition during coronavirus              | 65.26 %     | 6,211                  |
| How to look after my mental health                              | 31.14 %     | 2,964                  |
| How to manage being at home for so long                         | 26.79 %     | 2,550                  |
| I do not need more information on coronavirus                   | 13.05 %     | 1,242                  |
| <b>Confidence</b>                                               |             |                        |
| How well prepared do you feel? (1-10)                           | Mean (SD)   | Observations           |
|                                                                 | 6.41 (1.7)  | 9,490                  |
| <b>By Gender</b>                                                |             |                        |
| Male                                                            | 6.63 (1.75) | 1,729                  |
| Female                                                          | 6.36 (1.80) | 1,683                  |
| <b>By Age</b>                                                   |             |                        |
| 17 and under                                                    | 6.41 (1.70) | 444                    |
| 18 to 29                                                        | 5.94 (1.71) | 967                    |
| 30 to 39                                                        | 6.07 (1.74) | 1,982                  |
| 40 to 49                                                        | 6.36 (1.75) | 2,555                  |
| 50 to 59                                                        | 6.60 (1.78) | 1,803                  |
| 60 to 69                                                        | 6.89 (1.85) | 1,067                  |
| 70 to 79                                                        | 7.12 (1.76) | 533                    |
| 80 and above                                                    | 6.92 (1.90) | 70                     |
| <b>By diagnosis</b>                                             |             |                        |

|  |                                                      |             |       |
|--|------------------------------------------------------|-------------|-------|
|  | Asthma                                               | 6.36 (1.76) | 7,958 |
|  | COPD                                                 | 6.68 (2.00) | 657   |
|  | Bronchiectasis                                       | 6.63 (1.88) | 361   |
|  | ILD                                                  | 6.79 (1.89) | 168   |
|  | Other                                                | 6.50 (1.80) | 46    |
|  |                                                      |             |       |
|  | <b>Confidence following government advice (1-10)</b> | 4.17 (0.85) | 9,480 |
|  | <b>By Gender</b>                                     |             |       |
|  | Male                                                 | 4.15 (0.86) | 1,727 |
|  | Female                                               | 4.17(0.86)  | 7,675 |
|  |                                                      |             |       |
|  | <b>By Age</b>                                        |             |       |
|  | 17 and under                                         | 4.27 (0.75) | 440   |
|  | 18 to 29                                             | 4.06 (0.84) | 965   |
|  | 30 to 39                                             | 4.05 (0.92) | 1,975 |
|  | 40 to 49                                             | 4.12 (0.87) | 2,552 |
|  | 50 to 59                                             | 4.19 (0.85) | 1,802 |
|  | 60 to 69                                             | 4.36 (0.79) | 1,068 |
|  | 70 to 79                                             | 4.47 (0.67) | 537   |
|  | 80 and above                                         | 4.30 (0.80) | 71    |
|  |                                                      |             |       |
|  | <b>By diagnosis</b>                                  |             |       |
|  | Asthma                                               | 4.14 (0.87) | 7,944 |
|  | COPD                                                 | 4.34 (0.81) | 959   |
|  | Bronchiectasis                                       | 4.31 (0.78) | 362   |
|  | ILD                                                  | 4.42 (0.72) | 169   |
|  | Other                                                | 4.26 (0.80) | 46    |
|  |                                                      |             |       |
|  | <b>Problems accessing groceries</b>                  | 21.95 %     | 2,089 |
|  | <b>By Gender</b>                                     |             |       |
|  | Male                                                 | 18.29 %     | 317   |
|  | Female                                               | 22.74 %     | 1,752 |
|  |                                                      |             |       |
|  | <b>By Age</b>                                        |             |       |
|  | 17 and under                                         | 18.47 %     | 82    |
|  | 18 to 29                                             | 23.35 %     | 226   |
|  | 30 to 39                                             | 24.80 %     | 492   |
|  | 40 to 49                                             | 22.30 %     | 571   |
|  | 50 to 59                                             | 19.16 %     | 346   |
|  | 60 to 69                                             | 22.39 %     | 240   |
|  | 70 to 79                                             | 18.22 %     | 98    |
|  | 80 and above                                         | 19.44 %     | 14    |
|  |                                                      |             |       |
|  | <b>By diagnosis</b>                                  |             |       |
|  | Asthma                                               | 21.23 %     | 1,693 |
|  | COPD                                                 | 22.53 %     | 217   |
|  | Bronchiectasis                                       | 30.58 %     | 111   |
|  | ILD                                                  | 31.36 %     | 53    |
|  | Other                                                | 32.61 %     | 15    |
|  |                                                      |             |       |

|                                                                                                |                |         |       |
|------------------------------------------------------------------------------------------------|----------------|---------|-------|
| <b>Problems accessing prescriptions</b>                                                        |                | 7.28 %  | 693   |
| By Gender                                                                                      |                |         |       |
|                                                                                                | Male           | 6.52 %  | 113   |
|                                                                                                | Female         | 7.46 %  | 575   |
| By Age                                                                                         |                |         |       |
|                                                                                                | 17 and under   | 8.33 %  | 37    |
|                                                                                                | 18 to 29       | 10.23 % | 99    |
|                                                                                                | 30 to 39       | 8.62 %  | 171   |
|                                                                                                | 40 to 49       | 7.93 %  | 203   |
|                                                                                                | 50 to 59       | 5.43 %  | 98    |
|                                                                                                | 60 to 69       | 4.76 %  | 51    |
|                                                                                                | 70 to 79       | 5.39 %  | 29    |
|                                                                                                | 80 and above   | 2.78 %  | 2     |
| By diagnosis                                                                                   |                |         |       |
|                                                                                                | Asthma         | 7.72 %  | 616   |
|                                                                                                | COPD           | 4.78 %  | 46    |
|                                                                                                | Bronchiectasis | 6.06 %  | 22    |
|                                                                                                | ILD            | 2.96 %  | 5     |
|                                                                                                | Other          | 8.70 %  | 4     |
| <b>Have you used any of these services due to coronavirus, or concerns about its symptoms?</b> |                |         |       |
| <b>Used 111 Online</b>                                                                         |                | 19.23 % | 1,830 |
| By Gender                                                                                      |                |         |       |
|                                                                                                | Male           | 17.57 % | 304   |
|                                                                                                | Female         | 19.64 % | 1,513 |
| By Age                                                                                         |                |         |       |
|                                                                                                | 17 and under   | 24.32 % | 444   |
|                                                                                                | 18 to 29       | 23.35 % | 968   |
|                                                                                                | 30 to 39       | 26.41 % | 1,984 |
|                                                                                                | 40 to 49       | 21.80 % | 558   |
|                                                                                                | 50 to 59       | 16.06 % | 290   |
|                                                                                                | 60 to 69       | 8.68 %  | 93    |
|                                                                                                | 70 to 79       | 2.79 %  | 15    |
|                                                                                                | 80 and above   | 2.78 %  | 2     |
| By diagnosis                                                                                   |                |         |       |
|                                                                                                | Asthma         | 21.45 % | 1,711 |
|                                                                                                | COPD           | 6.65 %  | 64    |
|                                                                                                | Bronchiectasis | 10.19 % | 37    |
|                                                                                                | ILD            | 7.10 %  | 12    |
|                                                                                                | Other          | 13.04 % | 6     |
| <b>Used 111 Phone</b>                                                                          |                | 8.01 %  | 762   |
| By Gender                                                                                      |                |         |       |
|                                                                                                | Male           | 8.02 %  | 139   |

|                     |                |         |       |
|---------------------|----------------|---------|-------|
|                     | Female         | 8.00 %  | 616   |
| <b>By Age</b>       |                |         |       |
|                     | 17 and under   | 9.68 %  | 43    |
|                     | 18 to 29       | 10.12 % | 98    |
|                     | 30 to 39       | 11.19 % | 222   |
|                     | 40 to 49       | 8.67 %  | 222   |
|                     | 50 to 59       | 6.76 %  | 122   |
|                     | 60 to 69       | 3.26 %  | 35    |
|                     | 70 to 79       | 2.79 %  | 15    |
|                     | 80 and above   | 0.00 %  | 0     |
| <b>By diagnosis</b> |                |         |       |
|                     | Asthma         | 8.80 %  | 702   |
|                     | COPD           | 3.53 %  | 34    |
|                     | Bronchiectasis | 3.86 %  | 14    |
|                     | ILD            | 5.33 %  | 9     |
|                     | Other          | 6.52 %  | 3     |
| <b>Used A&amp;E</b> |                |         |       |
|                     |                | 1.11 %  | 106   |
| <b>By Gender</b>    |                |         |       |
|                     | Male           | 1.15 %  | 20    |
|                     | Female         | 1.10 %  | 85    |
| <b>By Age</b>       |                |         |       |
|                     | 17 and under   | 0.90 %  | 4     |
|                     | 18 to 29       | 1.14 %  | 11    |
|                     | 30 to 39       | 1.14 %  | 35    |
|                     | 40 to 49       | 1.45 %  | 37    |
|                     | 50 to 59       | 0.78 %  | 14    |
|                     | 60 to 69       | 0.28 %  | 3     |
|                     | 70 to 79       | 0.00 %  | 0     |
|                     | 80 and above   | 1.39 %  | 1     |
| <b>By diagnosis</b> |                |         |       |
|                     | Asthma         | 1.24 %  | 99    |
|                     | COPD           | 0.42 %  | 4     |
|                     | Bronchiectasis | 0.55 %  | 2     |
|                     | ILD            | 0.59 %  | 1     |
|                     | Other          | 0.00 %  | 0     |
| <b>Used GP</b>      |                |         |       |
|                     |                | 25.63 % | 2,439 |
| <b>By Gender</b>    |                |         |       |
|                     | Male           | 23.43 % | 406   |
|                     | Female         | 26.20 % | 7,703 |
| <b>By Age</b>       |                |         |       |
|                     | 17 and under   | 26.58 % | 118   |
|                     | 18 to 29       | 29.65 % | 287   |
|                     | 30 to 39       | 29.74 % | 590   |



|  |                                    |         |       |
|--|------------------------------------|---------|-------|
|  | 40 to 49                           | 28.83 % | 738   |
|  | 50 to 59                           | 24.97 % | 451   |
|  | 60 to 69                           | 16.60 % | 178   |
|  | 70 to 79                           | 10.97 % | 59    |
|  | 80 and above                       | 6.94 %  | 5     |
|  |                                    |         |       |
|  |                                    |         |       |
|  | <b>By diagnosis</b>                |         |       |
|  | Asthma                             | 27.18 % | 2,168 |
|  | COPD                               | 14.75 % | 142   |
|  | Bronchiectasis                     | 22.31 % | 81    |
|  | ILD                                | 22.49 % | 38    |
|  | Other                              | 21.74 % | 10    |
|  |                                    |         |       |
|  | <b>Used the pharmacy</b>           | 8.95 %  | 852   |
|  | <b>By Gender</b>                   |         |       |
|  | Male                               | 10.91 % | 189   |
|  | Female                             | 8.54 %  | 658   |
|  |                                    |         |       |
|  | <b>By Age</b>                      |         |       |
|  | 17 and under                       | 11.71 % | 52    |
|  | 18 to 29                           | 10.64 % | 103   |
|  | 30 to 39                           | 8.87 %  | 174   |
|  | 40 to 49                           | 9.49 %  | 243   |
|  | 50 to 59                           | 8.42 %  | 152   |
|  | 60 to 69                           | 7.46 %  | 80    |
|  | 70 to 79                           | 7.06 %  | 38    |
|  | 80 and above                       | 6.94 %  | 5     |
|  |                                    |         |       |
|  | <b>By diagnosis</b>                |         |       |
|  | Asthma                             | 9.19 %  | 733   |
|  | COPD                               | 8.20 %  | 79    |
|  | Bronchiectasis                     | 7.44 %  | 27    |
|  | ILD                                | 6.51 %  | 11    |
|  | Other                              | 4.35 %  | 2     |
|  |                                    |         |       |
|  | <b>Used BLF or AUK nurse phone</b> | 7.19 %  | 684   |
|  | <b>By Gender</b>                   |         |       |
|  | Male                               | 6.29 %  | 109   |
|  | Female                             | 7.40 %  | 570   |
|  |                                    |         |       |
|  | <b>By Age</b>                      |         |       |
|  | 17 and under                       | 9.23 %  | 41    |
|  | 18 to 29                           | 8.06 %  | 78    |
|  | 30 to 39                           | 8.87 %  | 176   |
|  | 40 to 49                           | 8.36 %  | 214   |
|  | 50 to 59                           | 7.14 %  | 129   |
|  | 60 to 69                           | 2.89 %  | 31    |
|  | 70 to 79                           | 2.23 %  | 12    |
|  | 80 and above                       | 0       | 0     |
|  |                                    |         |       |

|                           |         |       |
|---------------------------|---------|-------|
| By diagnosis              |         |       |
| Asthma                    | 8.13 %  | 648   |
| COPD                      | 1.56 %  | 15    |
| Bronchiectasis            | 3.86 %  | 14    |
| ILD                       | 2.96 %  | 5     |
| Other                     | 4.35 %  | 2     |
|                           |         |       |
| <b>Used none of these</b> | 55.45 % | 5,278 |
| By Gender                 |         |       |
| Male                      | 57.11 % | 1,007 |
| Female                    | 54.85 % | 4,225 |
|                           |         |       |
| By Age                    |         |       |
| 17 and under              | 48.65 % | 216   |
| 18 to 29                  | 50.52 % | 489   |
| 30 to 39                  | 47.33 % | 939   |
| 40 to 49                  | 52.19 % | 1,336 |
| 50 to 59                  | 56.92 % | 1,028 |
| 60 to 69                  | 69.50 % | 745   |
| 70 to 79                  | 78.44 % | 422   |
| 80 and above              | 83.33 % | 60    |
|                           |         |       |
| By diagnosis              |         |       |
| Asthma                    | 52.69 % | 4,202 |
| COPD                      | 73.00 % | 703   |
| Bronchiectasis            | 65.84 % | 239   |
| ILD                       | 62.72 % | 106   |
| Other                     | 60.87 % | 28    |
|                           |         |       |

Additional Graphs of Anxiety and Loneliness by Age and Diagnosis

Anxiety by Diagnosis

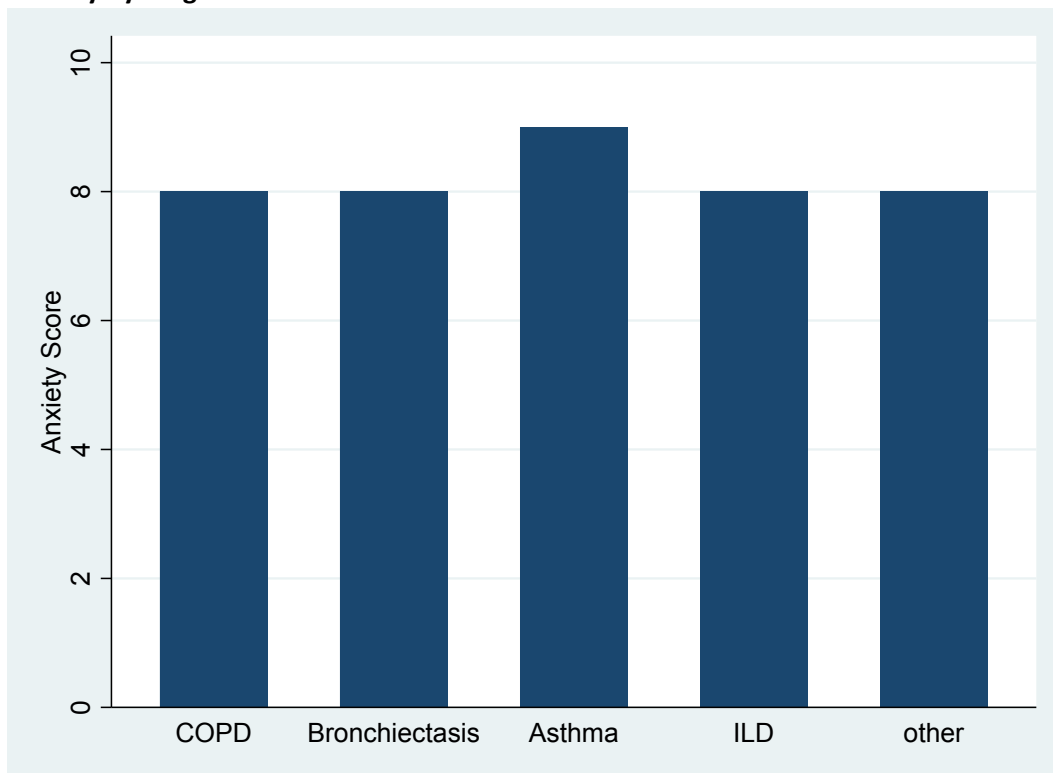

Loneliness by Age Group

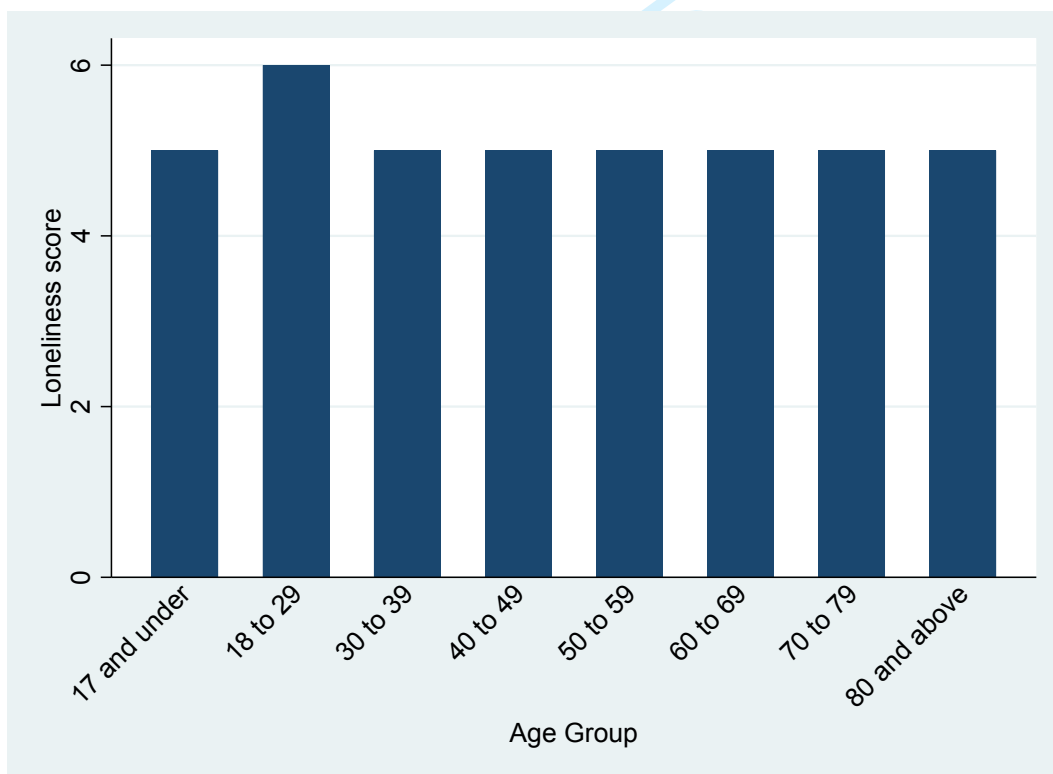

Loneliness by Diagnosis

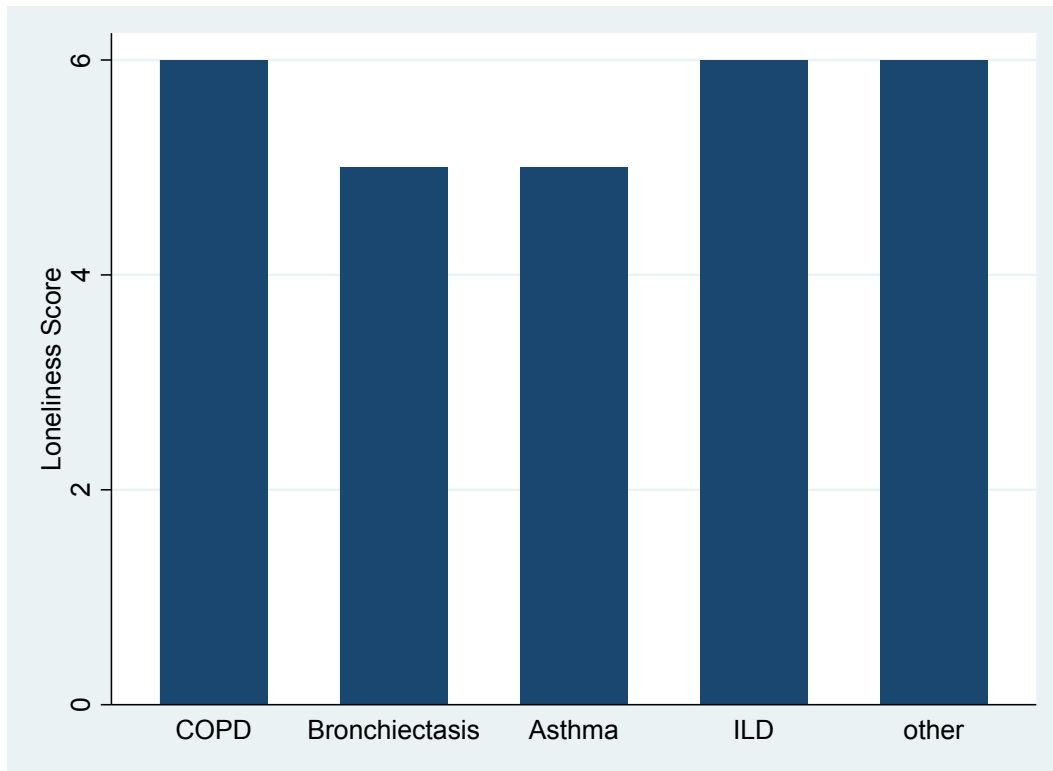

review only

1  
2  
3  
4  
5  
6  
7  
8  
9  
10  
11  
12  
13  
14  
15  
16  
17  
18  
19  
20  
21  
22  
23  
24  
25  
26  
27  
28  
29  
30  
31  
32  
33  
34  
35  
36  
37  
38  
39  
40  
41  
42  
43  
44  
45  
46  
47  
48  
49  
50  
51  
52  
53  
54  
55  
56  
57  
58  
59  
60

# Reporting checklist for cross sectional study.

Based on the STROBE cross sectional guidelines.

## Instructions to authors

Complete this checklist by entering the page numbers from your manuscript where readers will find each of the items listed below.

Your article may not currently address all the items on the checklist. Please modify your text to include the missing information. If you are certain that an item does not apply, please write "n/a" and provide a short explanation.

Upload your completed checklist as an extra file when you submit to a journal.

In your methods section, say that you used the STROBE cross sectional reporting guidelines, and cite them as:

von Elm E, Altman DG, Egger M, Pocock SJ, Gøtzsche PC, Vandenbroucke JP. The Strengthening the Reporting of Observational Studies in Epidemiology (STROBE) Statement: guidelines for reporting observational studies.

|                           | Reporting Item                                                                                                                                     | Page Number |
|---------------------------|----------------------------------------------------------------------------------------------------------------------------------------------------|-------------|
| <b>Title and abstract</b> |                                                                                                                                                    |             |
| Title                     | <a href="#">#1a</a> Indicate the study's design with a commonly used term in the title or the abstract                                             | 1           |
| Abstract                  | <a href="#">#1b</a> Provide in the abstract an informative and balanced summary of what was done and what was found                                | 3           |
| <b>Introduction</b>       |                                                                                                                                                    |             |
| Background / rationale    | <a href="#">#2</a> Explain the scientific background and rationale for the investigation being reported                                            | 4           |
| Objectives                | <a href="#">#3</a> State specific objectives, including any prespecified hypotheses                                                                | 5           |
| <b>Methods</b>            |                                                                                                                                                    |             |
| Study design              | <a href="#">#4</a> Present key elements of study design early in the paper                                                                         | 5           |
| Setting                   | <a href="#">#5</a> Describe the setting, locations, and relevant dates, including periods of recruitment, exposure, follow-up, and data collection | 5           |

|    |                      |                      |                                                                                                                                                                                                                                                                                |                          |
|----|----------------------|----------------------|--------------------------------------------------------------------------------------------------------------------------------------------------------------------------------------------------------------------------------------------------------------------------------|--------------------------|
| 1  | Eligibility criteria | <a href="#">#6a</a>  | Give the eligibility criteria, and the sources and methods of selection of participants.                                                                                                                                                                                       | 5                        |
| 2  |                      |                      |                                                                                                                                                                                                                                                                                |                          |
| 3  |                      |                      |                                                                                                                                                                                                                                                                                |                          |
| 4  |                      |                      |                                                                                                                                                                                                                                                                                |                          |
| 5  |                      | <a href="#">#7</a>   | Clearly define all outcomes, exposures, predictors, potential confounders, and effect modifiers. Give diagnostic criteria, if applicable                                                                                                                                       | 5                        |
| 6  |                      |                      |                                                                                                                                                                                                                                                                                |                          |
| 7  |                      |                      |                                                                                                                                                                                                                                                                                |                          |
| 8  |                      |                      |                                                                                                                                                                                                                                                                                |                          |
| 9  |                      |                      |                                                                                                                                                                                                                                                                                |                          |
| 10 | Data sources /       | <a href="#">#8</a>   | For each variable of interest give sources of data and details of methods of assessment (measurement). Describe comparability of assessment methods if there is more than one group. Give information separately for for exposed and unexposed groups if applicable.           | 5                        |
| 11 | measurement          |                      |                                                                                                                                                                                                                                                                                |                          |
| 12 |                      |                      |                                                                                                                                                                                                                                                                                |                          |
| 13 |                      |                      |                                                                                                                                                                                                                                                                                |                          |
| 14 |                      |                      |                                                                                                                                                                                                                                                                                |                          |
| 15 |                      |                      |                                                                                                                                                                                                                                                                                |                          |
| 16 |                      |                      |                                                                                                                                                                                                                                                                                |                          |
| 17 |                      |                      |                                                                                                                                                                                                                                                                                |                          |
| 18 | Bias                 | <a href="#">#9</a>   | Describe any efforts to address potential sources of bias                                                                                                                                                                                                                      | 10                       |
| 19 |                      |                      |                                                                                                                                                                                                                                                                                |                          |
| 20 |                      |                      |                                                                                                                                                                                                                                                                                |                          |
| 21 | Study size           | <a href="#">#10</a>  | Explain how the study size was arrived at                                                                                                                                                                                                                                      | 6                        |
| 22 |                      |                      |                                                                                                                                                                                                                                                                                |                          |
| 23 | Quantitative         | <a href="#">#11</a>  | Explain how quantitative variables were handled in the analyses. If applicable, describe which groupings were chosen, and why                                                                                                                                                  | 6-9                      |
| 24 | variables            |                      |                                                                                                                                                                                                                                                                                |                          |
| 25 |                      |                      |                                                                                                                                                                                                                                                                                |                          |
| 26 |                      |                      |                                                                                                                                                                                                                                                                                |                          |
| 27 | Statistical          | <a href="#">#12a</a> | Describe all statistical methods, including those used to control for confounding                                                                                                                                                                                              | 6-9, Figure 1 and Tables |
| 28 | methods              |                      |                                                                                                                                                                                                                                                                                |                          |
| 29 |                      |                      |                                                                                                                                                                                                                                                                                |                          |
| 30 |                      |                      |                                                                                                                                                                                                                                                                                |                          |
| 31 | Statistical          | <a href="#">#12b</a> | Describe any methods used to examine subgroups and interactions                                                                                                                                                                                                                | Figure 1                 |
| 32 | methods              |                      |                                                                                                                                                                                                                                                                                |                          |
| 33 |                      |                      |                                                                                                                                                                                                                                                                                |                          |
| 34 |                      |                      |                                                                                                                                                                                                                                                                                |                          |
| 35 | Statistical          | <a href="#">#12c</a> | Explain how missing data were addressed                                                                                                                                                                                                                                        | n/a                      |
| 36 | methods              |                      |                                                                                                                                                                                                                                                                                |                          |
| 37 |                      |                      |                                                                                                                                                                                                                                                                                |                          |
| 38 | Statistical          | <a href="#">#12d</a> | If applicable, describe analytical methods taking account of sampling strategy                                                                                                                                                                                                 | n/a                      |
| 39 | methods              |                      |                                                                                                                                                                                                                                                                                |                          |
| 40 |                      |                      |                                                                                                                                                                                                                                                                                |                          |
| 41 |                      |                      |                                                                                                                                                                                                                                                                                |                          |
| 42 | Statistical          | <a href="#">#12e</a> | Describe any sensitivity analyses                                                                                                                                                                                                                                              | n/a                      |
| 43 | methods              |                      |                                                                                                                                                                                                                                                                                |                          |
| 44 |                      |                      |                                                                                                                                                                                                                                                                                |                          |
| 45 |                      |                      |                                                                                                                                                                                                                                                                                |                          |
| 46 | <b>Results</b>       |                      |                                                                                                                                                                                                                                                                                |                          |
| 47 |                      |                      |                                                                                                                                                                                                                                                                                |                          |
| 48 | Participants         | <a href="#">#13a</a> | Report numbers of individuals at each stage of study—eg numbers potentially eligible, examined for eligibility, confirmed eligible, included in the study, completing follow-up, and analysed. Give information separately for for exposed and unexposed groups if applicable. | 6                        |
| 49 |                      |                      |                                                                                                                                                                                                                                                                                |                          |
| 50 |                      |                      |                                                                                                                                                                                                                                                                                |                          |
| 51 |                      |                      |                                                                                                                                                                                                                                                                                |                          |
| 52 |                      |                      |                                                                                                                                                                                                                                                                                |                          |
| 53 |                      |                      |                                                                                                                                                                                                                                                                                |                          |
| 54 |                      |                      |                                                                                                                                                                                                                                                                                |                          |
| 55 |                      |                      |                                                                                                                                                                                                                                                                                |                          |
| 56 | Participants         | <a href="#">#13b</a> | Give reasons for non-participation at each stage                                                                                                                                                                                                                               | n/a                      |
| 57 |                      |                      |                                                                                                                                                                                                                                                                                |                          |
| 58 |                      |                      |                                                                                                                                                                                                                                                                                |                          |
| 59 |                      |                      |                                                                                                                                                                                                                                                                                |                          |
| 60 |                      |                      |                                                                                                                                                                                                                                                                                |                          |

|    |                    |                      |                                                                                                                                                                                                                   |                                      |
|----|--------------------|----------------------|-------------------------------------------------------------------------------------------------------------------------------------------------------------------------------------------------------------------|--------------------------------------|
| 1  | Participants       | <a href="#">#13c</a> | Consider use of a flow diagram                                                                                                                                                                                    | 6                                    |
| 2  |                    |                      |                                                                                                                                                                                                                   |                                      |
| 3  | Descriptive data   | <a href="#">#14a</a> | Give characteristics of study participants (eg demographic, clinical, social) and information on exposures and potential confounders. Give information separately for exposed and unexposed groups if applicable. | 6 and Table 1                        |
| 4  |                    |                      |                                                                                                                                                                                                                   |                                      |
| 5  |                    |                      |                                                                                                                                                                                                                   |                                      |
| 6  |                    |                      |                                                                                                                                                                                                                   |                                      |
| 7  |                    |                      |                                                                                                                                                                                                                   |                                      |
| 8  |                    |                      |                                                                                                                                                                                                                   |                                      |
| 9  |                    |                      |                                                                                                                                                                                                                   |                                      |
| 10 | Descriptive data   | <a href="#">#14b</a> | Indicate number of participants with missing data for each variable of interest                                                                                                                                   | Tables 1, 2, E1 and E2 (online supp) |
| 11 |                    |                      |                                                                                                                                                                                                                   |                                      |
| 12 |                    |                      |                                                                                                                                                                                                                   |                                      |
| 13 |                    |                      |                                                                                                                                                                                                                   |                                      |
| 14 |                    |                      |                                                                                                                                                                                                                   |                                      |
| 15 | Outcome data       | <a href="#">#15</a>  | Report numbers of outcome events or summary measures. Give information separately for exposed and unexposed groups if applicable.                                                                                 | n/a                                  |
| 16 |                    |                      |                                                                                                                                                                                                                   |                                      |
| 17 |                    |                      |                                                                                                                                                                                                                   |                                      |
| 18 |                    |                      |                                                                                                                                                                                                                   |                                      |
| 19 |                    |                      |                                                                                                                                                                                                                   |                                      |
| 20 |                    |                      |                                                                                                                                                                                                                   |                                      |
| 21 | Main results       | <a href="#">#16a</a> | Give unadjusted estimates and, if applicable, confounder-adjusted estimates and their precision (eg, 95% confidence interval). Make clear which confounders were adjusted for and why they were included          | 6                                    |
| 22 |                    |                      |                                                                                                                                                                                                                   |                                      |
| 23 |                    |                      |                                                                                                                                                                                                                   |                                      |
| 24 |                    |                      |                                                                                                                                                                                                                   |                                      |
| 25 |                    |                      |                                                                                                                                                                                                                   |                                      |
| 26 |                    |                      |                                                                                                                                                                                                                   |                                      |
| 27 | Main results       | <a href="#">#16b</a> | Report category boundaries when continuous variables were categorized                                                                                                                                             | 6                                    |
| 28 |                    |                      |                                                                                                                                                                                                                   |                                      |
| 29 |                    |                      |                                                                                                                                                                                                                   |                                      |
| 30 |                    |                      |                                                                                                                                                                                                                   |                                      |
| 31 | Main results       | <a href="#">#16c</a> | If relevant, consider translating estimates of relative risk into absolute risk for a meaningful time period                                                                                                      | n/a                                  |
| 32 |                    |                      |                                                                                                                                                                                                                   |                                      |
| 33 |                    |                      |                                                                                                                                                                                                                   |                                      |
| 34 |                    |                      |                                                                                                                                                                                                                   |                                      |
| 35 | Other analyses     | <a href="#">#17</a>  | Report other analyses done—e.g., analyses of subgroups and interactions, and sensitivity analyses                                                                                                                 | 6-9                                  |
| 36 |                    |                      |                                                                                                                                                                                                                   |                                      |
| 37 |                    |                      |                                                                                                                                                                                                                   |                                      |
| 38 |                    |                      |                                                                                                                                                                                                                   |                                      |
| 39 | <b>Discussion</b>  |                      |                                                                                                                                                                                                                   |                                      |
| 40 |                    |                      |                                                                                                                                                                                                                   |                                      |
| 41 | Key results        | <a href="#">#18</a>  | Summarise key results with reference to study objectives                                                                                                                                                          | 9-10                                 |
| 42 |                    |                      |                                                                                                                                                                                                                   |                                      |
| 43 |                    |                      |                                                                                                                                                                                                                   |                                      |
| 44 | Limitations        | <a href="#">#19</a>  | Discuss limitations of the study, taking into account sources of potential bias or imprecision. Discuss both direction and magnitude of any potential bias.                                                       | 10                                   |
| 45 |                    |                      |                                                                                                                                                                                                                   |                                      |
| 46 |                    |                      |                                                                                                                                                                                                                   |                                      |
| 47 |                    |                      |                                                                                                                                                                                                                   |                                      |
| 48 |                    |                      |                                                                                                                                                                                                                   |                                      |
| 49 | Interpretation     | <a href="#">#20</a>  | Give a cautious overall interpretation considering objectives, limitations, multiplicity of analyses, results from similar studies, and other relevant evidence.                                                  | 9-10                                 |
| 50 |                    |                      |                                                                                                                                                                                                                   |                                      |
| 51 |                    |                      |                                                                                                                                                                                                                   |                                      |
| 52 |                    |                      |                                                                                                                                                                                                                   |                                      |
| 53 |                    |                      |                                                                                                                                                                                                                   |                                      |
| 54 | Generalisability   | <a href="#">#21</a>  | Discuss the generalisability (external validity) of the study results                                                                                                                                             | 9-10                                 |
| 55 |                    |                      |                                                                                                                                                                                                                   |                                      |
| 56 |                    |                      |                                                                                                                                                                                                                   |                                      |
| 57 | <b>Other</b>       |                      |                                                                                                                                                                                                                   |                                      |
| 58 | <b>Information</b> |                      |                                                                                                                                                                                                                   |                                      |
| 59 |                    |                      |                                                                                                                                                                                                                   |                                      |
| 60 |                    |                      |                                                                                                                                                                                                                   |                                      |

1 Funding [#22](#) Give the source of funding and the role of the funders for the 1  
2 present study and, if applicable, for the original study on which the  
3 present article is based  
4  
5

6 Notes:  
7

- 8 • 12a: 6-9, Figure 1 and Tables
- 9 • 14a: 6 and Table 1
- 10 • 14b: Tables 1, 2, E1 and E2 (online supp) The STROBE checklist is distributed under the terms of the  
11 Creative Commons Attribution License CC-BY. This checklist was completed on 26. May 2020 using  
12 <https://www.goodreports.org/>, a tool made by the [EQUATOR Network](#) in collaboration with [Penelope.ai](#)  
13  
14  
15  
16  
17  
18  
19  
20  
21  
22  
23  
24  
25  
26  
27  
28  
29  
30  
31  
32  
33  
34  
35  
36  
37  
38  
39  
40  
41  
42  
43  
44  
45  
46  
47  
48  
49  
50  
51  
52  
53  
54  
55  
56  
57  
58  
59  
60



# BMJ Open

## Respiratory patient experience of measures to reduce risk of COVID-19: findings from a descriptive cross-sectional UK wide survey

|                                 |                                                                                                                                                                                                                                                                                                                                                                                        |
|---------------------------------|----------------------------------------------------------------------------------------------------------------------------------------------------------------------------------------------------------------------------------------------------------------------------------------------------------------------------------------------------------------------------------------|
| Journal:                        | <i>BMJ Open</i>                                                                                                                                                                                                                                                                                                                                                                        |
| Manuscript ID                   | bmjopen-2020-040951.R1                                                                                                                                                                                                                                                                                                                                                                 |
| Article Type:                   | Original research                                                                                                                                                                                                                                                                                                                                                                      |
| Date Submitted by the Author:   | 05-Aug-2020                                                                                                                                                                                                                                                                                                                                                                            |
| Complete List of Authors:       | Philip, Keir; National Heart and Lung Institute<br>Cumella, Andrew; Asthma UK and British Lung Foundation Partnership<br>Farrington-Douglas, Joe; Asthma UK and British Lung Foundation Partnership<br>Laffan, Michael; Asthma UK and British Lung Foundation Partnership<br>Hopkinson, Nicholas; National Heart and Lung Institute; Asthma UK and British Lung Foundation Partnership |
| <b>Primary Subject Heading</b>: | Respiratory medicine                                                                                                                                                                                                                                                                                                                                                                   |
| Secondary Subject Heading:      | Medical management, Mental health, Patient-centred medicine                                                                                                                                                                                                                                                                                                                            |
| Keywords:                       | Public health < INFECTIOUS DISEASES, MENTAL HEALTH, RESPIRATORY MEDICINE (see Thoracic Medicine), Respiratory infections < THORACIC MEDICINE                                                                                                                                                                                                                                           |
|                                 |                                                                                                                                                                                                                                                                                                                                                                                        |

SCHOLARONE™  
Manuscripts



I, the Submitting Author has the right to grant and does grant on behalf of all authors of the Work (as defined in the below author licence), an exclusive licence and/or a non-exclusive licence for contributions from authors who are: i) UK Crown employees; ii) where BMJ has agreed a CC-BY licence shall apply, and/or iii) in accordance with the terms applicable for US Federal Government officers or employees acting as part of their official duties; on a worldwide, perpetual, irrevocable, royalty-free basis to BMJ Publishing Group Ltd ("BMJ") its licensees and where the relevant Journal is co-owned by BMJ to the co-owners of the Journal, to publish the Work in this journal and any other BMJ products and to exploit all rights, as set out in our [licence](#).

The Submitting Author accepts and understands that any supply made under these terms is made by BMJ to the Submitting Author unless you are acting as an employee on behalf of your employer or a postgraduate student of an affiliated institution which is paying any applicable article publishing charge ("APC") for Open Access articles. Where the Submitting Author wishes to make the Work available on an Open Access basis (and intends to pay the relevant APC), the terms of reuse of such Open Access shall be governed by a Creative Commons licence – details of these licences and which [Creative Commons](#) licence will apply to this Work are set out in our licence referred to above.

Other than as permitted in any relevant BMJ Author's Self Archiving Policies, I confirm this Work has not been accepted for publication elsewhere, is not being considered for publication elsewhere and does not duplicate material already published. I confirm all authors consent to publication of this Work and authorise the granting of this licence.

1  
2  
3 **Respiratory patient experience of measures to reduce risk of COVID-19: findings from a descriptive**  
4 **cross-sectional UK wide survey**  
5  
6  
7

8 Authors: Keir EJ Philip<sup>1</sup>, Andrew Cumella<sup>2</sup>, Joe Farrington-Douglas<sup>2</sup>, Michael Laffan<sup>2</sup>, Nicholas S  
9  
10 Hopkinson<sup>1,2</sup>,  
11  
12

13 <sup>1</sup>National Heart and Lung Institute, Imperial College London

14 <sup>2</sup>Asthma UK and British Lung Foundation Partnership  
15  
16  
17

18 Corresponding Author: Dr Keir Philip  
19

20  
21 National Heart and Lung Institute  
22

23 Imperial College London  
24

25 Royal Brompton Hospital Campus, Fulham Rd  
26

27 London SW3 6NP  
28

29 [k.philip@imperial.ac.uk](mailto:k.philip@imperial.ac.uk)  
30  
31  
32

33 ORCID iD: <https://orcid.org/0000-0001-9614-3580>  
34  
35  
36  
37

38 **Key Words:**  
39

40 COVID-19, respiratory, shielding, social distancing, long term condition, anxiety, loneliness  
41  
42  
43

44 **Contribution**  
45

46 KEJP, AC, JFD, ML, NSH developed the survey, KEJP performed the data analysis and wrote the first  
47  
48 draft. All authors contributed to revisions of this first draft and approved the final version.  
49  
50  
51

52 **Funding**  
53

54 KEJP was supported by the Imperial College Clinician Investigator Scholarship, which is managed  
55  
56 within Imperial College London, and does not have a specific award/grant number. The funders had  
57  
58 no say in the design and conduct of the study; collection, management, analysis, and interpretation  
59  
60

1  
2  
3 of the data; preparation, review, or approval of the manuscript; and decision to submit the  
4  
5 manuscript for publication.  
6  
7

#### 8 **Data availability statement** 9

10 All data relevant to the study are included in the article or uploaded as supplementary information  
11  
12  
13

#### 14 **Conflicts of interest** 15

16  
17 The authors report no conflicts of interest.  
18  
19

20 **Word Count:** 2584  
21  
22  
23  
24  
25  
26  
27  
28  
29  
30  
31  
32  
33  
34  
35  
36  
37  
38  
39  
40  
41  
42  
43  
44  
45  
46  
47  
48  
49  
50  
51  
52  
53  
54  
55  
56  
57  
58  
59  
60

1  
2  
3 **ABSTRACT** (262 words)  
4  
5

6 **Objectives:** To assess the experience of people with long-term respiratory conditions regarding the  
7  
8 impact of measures to reduce risk of COVID-19.  
9

10  
11 **Design:** Analysis of data (n=9,515) from the Asthma UK and British Lung Foundation partnership  
12  
13 COVID-19 survey collected online between 1<sup>st</sup> and 8<sup>th</sup> of April 2020.  
14  
15

16 **Setting:** Community  
17  
18

19 **Participants:** 9,515 people with self-reported long term respiratory conditions. 81% female, age  
20  
21 ranges from  $\leq 17$  years to 80 and above, from all nations of the UK. Long term respiratory conditions  
22  
23 reported included asthma (83%), Chronic Obstructive Pulmonary Disease (COPD) (10%),  
24  
25 bronchiectasis (4%), Interstitial Lung Disease (ILD) (2%), and 'other' (<1%) (e.g. lung cancer and  
26  
27 pulmonary endometriosis).  
28  
29

30  
31 **Outcome measures:** Study responses related to impacts on key elements of health care, as well as  
32  
33 practical, psychological and social consequences related to the COVID-19 pandemic and social  
34  
35 distancing measures.  
36  
37

38 **Results:** 45% reported disruptions to care, including cancellations of appointments, investigations,  
39  
40 pulmonary rehabilitation, treatment, and monitoring. Other practical impacts such as difficulty  
41  
42 accessing healthcare services for other issues, and getting basic necessities such as food, were also  
43  
44 common. 36% did not use online prescriptions and 54% had not accessed online inhaler technique  
45  
46 videos. Psycho-social impacts including anxiety, loneliness and concerns about personal health and  
47  
48 family were prevalent. 81% reported engaging in physical activity. Among the 11% who were smokers,  
49  
50 48% reported they were planning to quit smoking because of COVID-19.  
51  
52  
53

54 **Conclusions:** COVID-19 and related social distancing measures are having profound impacts on people  
55  
56 with chronic respiratory conditions. Urgent adaptation and signposting of services is required to  
57  
58 mitigate the negative health consequences of the COVID-19 response for this group.  
59  
60

### Strengths and limitations of this study

- This is one of the first studies in the UK to highlight the impact of COVID-19 related measures on people with long term health conditions.
- The study includes a large sample (n=9515) from broad range of respiratory conditions, age groups, and parts of the UK.
- Key gaps in healthcare provision/access are identified including online prescription and inhaler technique videos; self-management plans; smoking cessation support.
- Although a range of individuals are represented, the sample has a large percentage of people with asthma (83%) and is predominantly female (81%).
- A lack of data regarding disease severity, and further demographic information of interest such as socio-economic status, ethnicity and housing, limits the depth of interpretation possible.

### INTRODUCTION

COVID-19 is a particular threat for people with long term respiratory conditions, who are at greater risk of serious disease and death if they become infected<sup>1,2</sup>. Recommendations for respiratory patients include being especially careful regarding social distancing measures to reduce SARS-CoV-2 transmission. In the UK, for the most vulnerable a period of “social shielding”, avoiding face-to-face contact has been advised<sup>3,4</sup>, with twin aims of protecting individuals from infection and avoiding a peak of cases in the most vulnerable which might overwhelm the health and social care system. Measures to reduce the immediate impact of COVID-19 are likely to have some adverse consequences for the population’s health and wellbeing<sup>5-8</sup>, leading to a so called ‘third wave’ of COVID-19 related

1  
2  
3 morbidity and mortality in which detrimental health impacts for people with long-term conditions  
4 result from interruptions to care provision and health seeking behaviours<sup>9</sup>. This is of particular concern  
5 given the substantial level of unmet need related to respiratory disease<sup>10-15</sup>. Identification of health  
6 and wellbeing impacts is required to facilitate mitigation interventions, of which examples of  
7 successful approaches are being reported<sup>16</sup>.

8  
9  
10 Data on the experience of people with long term respiratory conditions regarding the impact of  
11 COVID-19 prevention measures is currently lacking<sup>17</sup>, but will be important for understanding of the  
12 impacts on these people, and to help guide current and future provision to where it is required.  
13  
14

## 15 16 17 18 19 20 21 22 23 24 25 **METHODS**

26  
27  
28 To assess the impact of measures to address COVID-19 on access to key elements of care<sup>18 19</sup> as well  
29 as the practical, psychological and emotional consequences of the current situation, we analysed data  
30 from an online survey carried out by the Asthma UK (AUK) and British Lung Foundation (BLF)  
31 Partnership between 1<sup>st</sup> and 8<sup>th</sup> of April 2020. The survey was developed by the authors, and other  
32 colleagues at the Asthma UK and British Lung Foundation (AUK-BLF) partnership, to improve  
33 understanding of the experiences of lockdown and coronavirus on people with lung conditions in the  
34 UK, and to find out how AUK-BLF can best support them. The topics were based on areas raised by  
35 patients and healthcare professionals as being of particularly vulnerable to disruption, and those  
36 having potentially important implications for disease management. The core survey was developed  
37 by both AUK and the BLF in partnership, with each adding a couple of questions specific to their patient  
38 group. In the Online Supplement the questions that only feature in the AUK or BLF versions are  
39 highlighted. The survey results for the core questions were then combined. Any single survey question  
40 responses are highlighted as such. The survey was promoted to supporters of both Asthma UK and  
41 the British Lung Foundation, and was conducted on Typeform. Initial response targets for the survey  
42 were 3,000 (AUK) and 1,000 (BLF). The survey was distributed to individuals on their mailing  
43  
44  
45  
46  
47  
48  
49  
50  
51  
52  
53  
54  
55  
56  
57  
58  
59  
60

1  
2  
3 lists, placed on the charities' websites, and advertised on social media (Facebook, Twitter, Instagram  
4 and LinkedIn). Social distancing measures were announced by the UK Government on 23<sup>rd</sup> March. The  
5 text of the survey is available in the online supplement. Furthermore, during the data collection  
6 period, Public Health England (PHE) recommendations relevant to survey respondents included 1) All  
7 members of the public were advised to stay at home, only being permitted to leave the house for a  
8 small number of specific reasons. 2) Shielding of "people with severe respiratory conditions including  
9 all cystic fibrosis, severe asthma and severe COPD" who were advised to "stay at home at all times  
10 and avoid any face-to-face contact for a period of at least 12 weeks".

11  
12 The analysis presented focuses on questions relating to 1) Impacts on healthcare provision, 2) Social,  
13 psychological and practical responses, and 3) Sources of support and information. Rating scales are  
14 from zero (lowest) to ten (highest) unless otherwise specified, for questions relating to how well  
15 prepared they felt, and levels of anxiety experienced. The survey questions and response options are  
16 provided in the Online Supplement. Data are presented using descriptive statistics. Where a between  
17 group difference was of a potentially clinically significant magnitude, this was tested using t-test or  
18 Kruskal-Wallis tests as appropriate. Data were grouped into 'Asthma' and Chronic respiratory disease  
19 (non-asthma) in table 1 so that the composition of the sample was clearer for readers. These data  
20 were collected by AUK-BLF as part of routine information gathering and marketing activities, which  
21 often relate to topical issues for people with respiratory conditions, in this case COVID-19. All  
22 participants consented to their responses being used for research, analysis and publication.  
23 Anonymised data were shared with the authors for analysis. The Charity's information governance  
24 process supported this, consistent with GDPR the General Data Protection Regulation (GDPR, the  
25 primary legislation regarding data protection and privacy in the European Union), and additional  
26 external ethical approval was not deemed necessary. Analyses were carried out using Stata V.14  
27 (StataCorp). Data used here are not being made publicly available.

## 58 **Patient and Public Involvement**

59  
60



1  
2  
3 Patients and members of the public were not specifically involved in the design, conduct or reporting  
4  
5 of this research. However, the primary focus of this research was to understand the impact of the  
6  
7 COVID-19 risk reduction measures on people living with long-term respiratory conditions, and  
8  
9 questions were shaped around issues being raised by patients and the public with AUK, BLF and the  
10  
11 clinical staff involved in developing the survey.  
12  
13  
14  
15  
16  
17

## 18 RESULTS

19  
20  
21 11,124 people started the AUK survey, of which 7,748 completed it, while 2,518 people started the  
22  
23 BLF survey, of which 1,856 provided completed responses. Hence, the initial survey data included  
24  
25 9,604 full responses. Responses were then removed from people without a lung condition (n=25);  
26  
27 people who completed the survey twice within the sampling period (n=24 BLF, n=21 AUK) and people  
28  
29 who completed both surveys (n=19), which left 9,515 individuals' responses for analysis.. Data  
30  
31 presented here are the combined responses to the core questions which were the same in the BLF  
32  
33 and AUK hosted surveys. The BLF hosted version contributed 1,787 responses, while the AUK hosted  
34  
35 survey contributed 7,728 responses. Where the sum of total answers given is less than 9,515 this is  
36  
37 due to non-response to that specific question. The surveys took respondents an average of (AUK)  
38  
39 8:36(m/s) and (BLF) 11:35(m/s) to complete. The exact response rate is not possible to establish given  
40  
41 the method by which the survey was publicised including via social media. This final sample was 81%  
42  
43 female, with age ranges from  $\leq 17$  years to 80 and above, and all nations of the UK represented.  
44  
45 Reported lung diseases were 83% asthma, 10% COPD, 4% bronchiectasis, 2% Interstitial Lung Disease  
46  
47 (ILD), and <1% 'other' for example lung cancer and pulmonary endometriosis (Table 1). Of people who  
48  
49 completed the AUK hosted version of the survey which asked about severity of asthma, 28.25% (2,179)  
50  
51 reported having 'difficult' 'severe' or 'brittle' asthma. The BLF hosted version of the survey included  
52  
53 an additional question on breathlessness, to which 32% of respondents with non-asthma diagnoses  
54  
55 reported being severely breathless (MRC dyspnoea score  $\geq 4$ ).  
56  
57  
58  
59  
60

### Impacts on Healthcare provision

Despite data collection occurring relatively early in the first wave of the UK pandemic, 45% reported disruptions in healthcare provision, including GP and hospital appointment cancellations affecting 10% and 8% of respondents respectively, with 31% reporting having appointments conducted remotely (e.g. by phone) (Table 2). Respondents reported various additional ways in which healthcare provision had been impacted by COVID-19 (under the freetext option 'other'), including cancelled operations, investigations, respiratory nurse appointments, and medication reviews. In addition, finding it difficult to get in contact with relevant care providers for advice and information. Despite being a population by definition with online access, one third did not access online prescription services and over half had not made use of online inhaler technique videos. Among the 11% who were smokers, 48% reported they were planning to quit smoking because of COVID-19. A majority of individuals did not have a written self-management plan despite the strong evidence base for this intervention<sup>19 20</sup>.

Reassuringly, respondents reported high levels of physical activity, with 81% being 'able to keep active or do exercise at home' (Table 2). Most frequently reported activities include walks (47%), housework (54%), and gardening (29%)(Table 2). In addition to the activities listed in table 2, 7% of respondents reported 'other' activities including home exercise bikes, trampolining, tennis, weights, skipping, home PR, Pilates, YouTube exercise videos, Zumba/dance and Wii fit.

### Social and psychological responses

High levels of anxiety about COVID-19 were reported; mean(SD) anxiety level 8.03(2.07); slightly higher in women than men, 8.13(1.99) vs 7.55(2.28)(t-test  $p < 0.001$ ), and decreasing slightly with age (Figure 1, Kruskal-Wallis  $p < 0.001$ ). Only 34% of men and 24% of women felt that they were 'coping well' (t-test for between group difference  $p < 0.001$ ). Older age groups were more likely to report

1  
2  
3 coping well with 47% of 70 to 79-year olds, steadily decreasing to 17% in the 18 to 29 years old group  
4  
5 (Kruskal-Wallis  $p < 0.001$ ). Respondent had various concerns, most commonly reported being 'concern  
6  
7 about lung condition' (64%), and concern about family (61%). Interestingly, both showing similar  
8  
9 variations related to age and gender as that seen in anxiety and 'coping well', with a higher percentage  
10  
11 of females, and younger people reporting concerns.  
12  
13

14  
15 The majority (87%) of respondents lived with another person; 51% felt they lacked companionship  
16  
17 'some of the time' or 'often', and 52% reported feeling left out of things 'some of the time' or 'often'.  
18  
19 66% of respondents felt 'isolated from others'. Combining the scores for these three statements  
20  
21 (modified 3 item UCLA loneliness score),<sup>21</sup> 3 being the lowest score for loneliness and 9 the highest,  
22  
23 the mean loneliness rating was 5.12(1.80), with broadly similar levels in women and men 5.21(1.81)  
24  
25 vs 4.74(1.72), although the difference was statistically significant (t-test  $p < 0.001$ ). Similarly, although  
26  
27 in this large sample the Kruskal-Wallis test showed values were not equal for age groups ( $p < 0.001$ )  
28  
29 and disease types ( $p < 0.001$ ), the differences in loneliness ratings between them were relatively small  
30  
31 (Online Table E1).  
32  
33

34  
35 Of note, responses in those who reported that they were actively shielding suggested only slightly  
36  
37 higher levels of loneliness to those who were not, at 5.23 and 4.85 (t-test  $p < 0.001$ ) respectively (Table  
38  
39 E1). 19.54% of respondents had received the government letter or text message advising them to  
40  
41 shield, of whom 98% were doing so. Mean perceived preparedness for COVID-19 was 6.41(1.7) out of  
42  
43 10. Again, although there were statistically significant differences related to gender (t-test  $p < 0.001$ ),  
44  
45 age (Kruskal-Wallis  $p < 0.001$ ), and diagnosis (Kruskal-Wallis  $p < 0.001$ ) these were small in absolute  
46  
47 terms, and as such unlikely to be of importance (Online Table E2).  
48  
49  
50  
51  
52  
53

#### 54 55 **Sources of support and Information** 56 57 58 59 60

1  
2  
3 Respondents reported having accessed various services to address concerns about coronavirus or its  
4 symptoms. These included NHS 111 online (19%) (an interactive website for the National Health  
5 Service that provides information, guidance and self-management support) which was used more  
6 commonly by younger adults (23 to 25% of under 40-year olds, compared with 3 to 9% of over 60  
7 years old, Kruskal-Wallis <0.001, Online Table E2) , despite the surveys being online which imply at  
8 least some level of digital literacy in all respondents. GPs had been used by 26% of respondents, again  
9 with a trend toward decreasing use in older (>60) age groups (Online Table E2). The NHS 111  
10 telephone service (a telephone service for non-emergency health advice and guidance) had been used  
11 by 8% of respondents with a similar decrease in use by older age groups. Though differences between  
12 conditions are seen this is likely due to certain conditions being more represented in certain age  
13 groups. For example, the same trends regarding age and NHS 111 online use were seen when asthma  
14 was considered alone. Only 1% of respondents reported using A&E, with no substantial differences in  
15 absolute values related to gender, age, or diagnosis. 55% of respondents reported not having used  
16 'any resources due to coronavirus or concerns about its symptoms'. Reporting not having used  
17 resources was more common in older than younger adults (Kruskal-Wallis <0.001, Online Table E2).  
18 As might be expected, higher percentages of respondents in working age groups were concerned  
19 about their financial situation due to missed work.  
20  
21  
22  
23  
24  
25  
26  
27  
28  
29  
30  
31  
32  
33  
34  
35  
36  
37  
38  
39  
40  
41

42 Respondents made use of various sources for information on coronavirus, the most commonly  
43 reported being television (73%), news websites (50%), and (non-BLF/AUK) social media (25%). Less  
44 commonly reported sources of information on coronavirus include BLF/AUK websites (17%) and social  
45 media (14%), radio (12%) and friends and family (8%) (See Online Table E2 for further responses about  
46 practical preparedness for COVID-19).  
47  
48  
49  
50  
51  
52

53 Respondents were particularly interested in having more information about how to manage their lung  
54 condition in relation to coronavirus (65%), decisions they may need to make if they were to get ill with  
55 COVID-19 (49%), and how to look after their mental health (31%).  
56  
57  
58  
59  
60

## Practical difficulties

Multiple difficulties were experienced by respondents regarding health impacting practical issues. 22% reported difficulties accessing groceries, while 7% had difficulties accessing prescriptions (Online Table E2)

## DISCUSSION

COVID-19 is having significant impacts on individuals with respiratory disease, generating high levels of anxiety and concerns about potential impacts on respondents and their families, compounded by social isolation and loneliness. In addition, many aspects of care have been cancelled or deferred, including pulmonary rehabilitation and severe asthma appointments in secondary and tertiary, care, on a background of provision that was already failing to meet the needs of many people<sup>10 11</sup>, with impacts evident despite relatively recent introduction of distancing measures. Respondents were clearly making an effort to engage in physical activity despite the challenging nature of the situation.

Despite the requirement for physical distancing, social isolation and loneliness can still be avoided, or reduced, through targeted support and intervention. There is growing evidence that COVID-19 disproportionately effects more deprived groups<sup>22</sup>. Isolation strategies are also likely to impact most heavily on the most disadvantaged individuals with the least economic and social capital.

A key practical issue is that nearly half the respondents who smoke tobacco reported that they intended to quit due to COVID-19. It will be important to ensure that there is provision of appropriate accessible smoking cessation support services, to maximise their chance of success both to reduce the occurrence of smoking related disease generally<sup>23</sup> and to reduce individuals' risk from COVID-19 specifically<sup>24</sup>. In addition, encouraging uptake of online prescriptions and directing patients to online

resources including inhaler technique videos to support self-management, as recommended in the NICE COVID-19 COPD Rapid Guideline Update (NG168)<sup>25</sup>, should be prioritised.

The study sample includes representation from a wide age range, a variety of respiratory conditions, and all countries of the UK, but some limitations exist. More detail about disease severity would have been useful for interpreting responses, as this impacts government guidance regarding distancing and shielding measures. The study was online so results may not be representative for digitally excluded individuals. In addition, this study did not assess the views on the use of facemasks which has been found to be protective, to some extent, for mental health in China<sup>26</sup>. This would be of interest to explore further in the UK population. Finally, the cross-sectional nature of this study does not allow for longitudinal change of the level of psychiatric comorbidity, which in patients with respiratory disorders may have a higher baseline prevalence than the general population even prior to the COVID-19 pandemic<sup>27</sup>.

## CONCLUSION

Measures to reduce the risk of COVID-19 are having profound impacts on people with lung disease including widespread disruption to fundamental components of healthcare services, high levels of anxiety and loneliness. There is an urgent need to adapt services to address these needs and improve signposting of individuals to existing resources, in order to mitigate negative health consequences, and provide appropriate care to this vulnerable group.

## Acknowledgements

The authors would like to thank Sarah MacFadyen for her work developing the survey, and the respondents for completing the survey.

**Transparency statement**

Dr Keir Philip affirms that this manuscript is an honest, accurate, and transparent account of the study being reported; that no important aspects of the study have been omitted; and that any discrepancies from the study as planned (and, if relevant, registered) have been explained.

For peer review only

**Table 1: Participant Characteristics**

|                                                    | Asthma<br>n=7975 | Chronic respiratory disease<br>(non-asthma)<br>n=1541 |
|----------------------------------------------------|------------------|-------------------------------------------------------|
| Age group                                          |                  |                                                       |
| 17 and under                                       | 5.54 % (439)     | 0.33 % (5)                                            |
| 18 to 29                                           | 12.11 % (959)    | 0.59 % (9)                                            |
| 30 to 39                                           | 24.68 % (1,955)  | 1.90 % (29)                                           |
| 40 to 49                                           | 30.60 % (2,424)  | 8.93 % (136)                                          |
| 50 to 59                                           | 18.67 % (1,479)  | 21.47 % (327)                                         |
| 60 to 69                                           | 6.26 % (496)     | 37.82 % (576)                                         |
| 70 to 79                                           | 1.94 % (154)     | 25.21 % (384)                                         |
| 80 and above                                       | 0.19 % (15)      | 3.74 % (57)                                           |
| Gender (%Female)                                   | 82.92 % (6,562)  | 74.67 % (1,141)                                       |
| Country                                            |                  |                                                       |
| England                                            | 75.35 % (5,981)  | 83.33 % (1,275)                                       |
| Scotland                                           | 13.03 % (1,034)  | 9.54 % (146)                                          |
| Wales                                              | 7.19 % (571)     | 5.23 % (80)                                           |
| Northern Ireland                                   | 4.43 % (352)     | 1.90 % (29)                                           |
| Influenza immunisation<br>2019/20                  |                  |                                                       |
| Yes                                                | 77.10 % (6,139)  | 89.96 % (1,380)                                       |
| No                                                 | 22.54 % (1,795)  | 9.97 % (153)                                          |
| Don't know                                         | 0.35 % (28)      | 0.07 % (1)                                            |
| Current smoking                                    |                  |                                                       |
| Non-smoker                                         | 89.41 % (7,115)  | 86.07 % (1,322)                                       |
| Smoker                                             | 10.59 % (843)    | 13.93 % (214)                                         |
| Of smokers -                                       |                  |                                                       |
| Intending to quit smoking due<br>to COVID-19       | 49.11 % (414)    | 64.48 % (138)                                         |
| Not intending quit smoking<br>due to COVID-19      | 50.89 % (429)    | 35.51 % (76)                                          |
| Shielding                                          |                  |                                                       |
| Actively shielding                                 | 68.66 % (5,461)  | 89.97 % (1,381)                                       |
| Not actively shielding                             | 31.34 % (2,493)  | 10.30 % (154)                                         |
| Self-isolating                                     |                  |                                                       |
| Currently self-isolating                           | 67.81 % (5,403)  | 88.01 % (1,350)                                       |
| Not currently self-isolating                       | 32.19 % (2,565)  | 11.99 % (184)                                         |
| Current COVID-19 Symptoms<br>'Yes'                 | 6.89 % (549)     | 3.07 % (47)                                           |
| Current COVID-19 Symptoms<br>'Not sure'            | 3.99 % (318)     | 3.78 % (58)                                           |
| Following self-isolation advice<br>due to symptoms | 92.81 % (800)    | 98.04 % (100)                                         |
| Not following self-isolation<br>advice             | 7.19 % (62)      | 1.96 % (2)                                            |
| Diagnosis                                          |                  |                                                       |



|                |                 |
|----------------|-----------------|
| Asthma         | 83.81 % (7,975) |
| COPD           | 10.12 % (963)   |
| Bronchiectasis | 3.81 % (363)    |
| ILD            | 1.78 % (169)    |
| Other          | 0.48 % (46)     |
|                |                 |

**Table 2: Impact of COVID-19 related measures on chronic disease healthcare provision and self-management**

| Component of disease management                         | Percentage | Number of observations |
|---------------------------------------------------------|------------|------------------------|
| <b>Health service provision</b>                         |            |                        |
| GP appointment cancelled                                | 9.69 %     | 922                    |
| Hospital appointment cancelled                          | 7.83 %     | 745                    |
| GP phone/remote appointment                             | 30.93 %    | 2,944                  |
| Some form of cancellation or change in service delivery | 44.86 %    | 4,270                  |
|                                                         |            |                        |
| <b>Of those who do PR (n=553)</b>                       |            |                        |
| Doing PR at home                                        | 24.77 %    | 137                    |
| PR cancelled                                            | 24.23 %    | 134                    |
|                                                         |            |                        |
| Have enough medications                                 | 93.41 %    | 8,871                  |
| Have online prescriptions                               | 64.38 %    | 6,112                  |
| Have a written self-management plan for their condition | 39.56 %    | 3,756                  |
| Have watched online inhaler videos                      |            |                        |
| Yes                                                     | 44.11 %    | 4,190                  |
| No                                                      | 53.57 %    | 5,089                  |
| Don't use inhalers                                      | 2.33 %     | 221                    |
|                                                         |            |                        |
| <b>Physical activity</b>                                |            |                        |
| Able to 'keep active' or do exercise at home            | 81.02 %    | 7,682                  |
| Not able to 'keep active' or do exercise at home        | 18.92 %    | 1,800                  |
| Type of activity                                        |            |                        |
| Walks                                                   | 47.05 %    | 4,478                  |
| Cycling                                                 | 6.43 %     | 612                    |
| Run                                                     | 7.17 %     | 682                    |
| Yoga                                                    | 12.03 %    | 1,145                  |
| Gardening                                               | 29.06 %    | 2,817                  |
| Housework                                               | 54.16 %    | 5,155                  |

**Figure 1: legend A bar chart of median anxiety level by age group**

## REFERENCES

1. Docherty AB, Harrison EM, Green CA, et al. Features of 20 133 UK patients in hospital with covid-19 using the ISARIC WHO Clinical Characterisation Protocol: prospective observational cohort study. *BMJ* 2020;369:m1985. doi: 10.1136/bmj.m1985
2. Williamson EJ, Walker AJ, Bhaskaran K, et al. OpenSAFELY: factors associated with COVID-19 death in 17 million patients. *Nature* 2020 doi: 10.1038/s41586-020-2521-4
3. Kmietowicz Z. Covid-19: Highest risk patients are asked to stay at home for 12 weeks. *Bmj* 2020;368:m1170. doi: 10.1136/bmj.m1170 [published Online First: 2020/03/25]
4. Public Health England. Guidance on shielding and protecting people defined on medical grounds as extremely vulnerable from COVID-19 2020 [updated 30/03/2020. Available from: <https://www.gov.uk/government/publications/guidance-on-shielding-and-protecting-extremely-vulnerable-persons-from-covid-19/guidance-on-shielding-and-protecting-extremely-vulnerable-persons-from-covid-19> accessed 09/04/2020 2020.
5. Steptoe A, Shankar A, Demakakos P, et al. Social isolation, loneliness, and all-cause mortality in older men and women. *Proceedings of the National Academy of Sciences of the United States of America* 2013;110(15):5797-801. doi: 10.1073/pnas.1219686110
6. Bu F, Philip K, Fancourt D. Social isolation and loneliness as risk factors for hospital admissions for respiratory disease among older adults. *Thorax* 2020 doi: 10.1136/thoraxjnl-2019-214445 [published Online First: 2020/04/23]
7. Wang C, Pan R, Wan X, et al. Immediate Psychological Responses and Associated Factors during the Initial Stage of the 2019 Coronavirus Disease (COVID-19) Epidemic among the General Population in China. *Int J Environ Res Public Health* 2020;17(5) doi: 10.3390/ijerph17051729 [published Online First: 2020/03/12]

- 1  
2  
3 8. Iob E, Steptoe A, Fancourt D. Abuse, self-harm and suicidal ideation in the UK during the COVID-19  
4 pandemic. *The British journal of psychiatry : the journal of mental science* 2020:1-4. doi:  
5 10.1192/bjp.2020.130 [published Online First: 2020/07/14]  
6  
7  
8  
9  
10 9. Douglas M, Katikireddi SV, Taulbut M, et al. Mitigating the wider health effects of covid-19  
11 pandemic response. *BMJ* 2020;369:m1557. doi: 10.1136/bmj.m1557  
12  
13  
14 10. Elbehairy AF, Quint JK, Rogers J, et al. Patterns of breathlessness and associated consulting  
15 behaviour: results of an online survey. *Thorax* 2019;74(8):814-17. doi: 10.1136/thoraxjnl-  
16 2018-212950  
17  
18  
19  
20 11. Philip K, Gaduzo S, Rogers J, et al. Patient experience of COPD care: outcomes from the British  
21 Lung Foundation Patient Passport. *BMJ Open Respiratory Research* 2019;6(1):e000478. doi:  
22 10.1136/bmjresp-2019-000478  
23  
24  
25  
26  
27 12. Kelly JL, Elkin SL, Fluxman J, et al. Breathlessness and skeletal muscle weakness in patients  
28 undergoing lung health screening in primary care. *Copd* 2013;10(1):40-54. doi:  
29 10.3109/15412555.2012.727923 [published Online First: 2013/01/01]  
30  
31  
32  
33 13. Nacul L, Soljak M, Samarasundera E, et al. COPD in England: a comparison of expected, model-  
34 based prevalence and observed prevalence from general practice data. *J Public Health (Oxf)*  
35 2011;33(1):108-16. doi: 10.1093/pubmed/fdq031 [published Online First: 2010/06/05]  
36  
37  
38  
39 14. Steiner MC, Lowe D, Beckford K, et al. Socioeconomic deprivation and the outcome of pulmonary  
40 rehabilitation in England and Wales. *Thorax* 2017;72(6):530-37. doi: 10.1136/thoraxjnl-2016-  
41 209376  
42  
43  
44  
45 15. Zoumot Z, Jordan S, Hopkinson NS. Emphysema: time to say farewell to therapeutic nihilism.  
46 *Thorax* 2014;69(11):973-5. doi: 10.1136/thoraxjnl-2014-205667 [published Online First:  
47 2014/07/06]  
48  
49  
50  
51  
52  
53 16. Tan W, Hao F, McIntyre RS, et al. Is returning to work during the COVID-19 pandemic stressful? A  
54 study on immediate mental health status and psychoneuroimmunity prevention measures  
55  
56  
57  
58  
59  
60

- 1  
2  
3 of Chinese workforce. *Brain Behav Immun* 2020;87:84-92. doi: 10.1016/j.bbi.2020.04.055  
4  
5 [published Online First: 2020/04/27]  
6  
7  
8 17. Tran BX, Ha GH, Nguyen LH, et al. Studies of Novel Coronavirus Disease 19 (COVID-19) Pandemic:  
9  
10 A Global Analysis of Literature. *Int J Environ Res Public Health* 2020;17(11) doi:  
11  
12 10.3390/ijerph17114095 [published Online First: 2020/06/12]  
13  
14 18. Hopkinson NS, Molyneux A, Pink J, et al. Chronic obstructive pulmonary disease: diagnosis and  
15  
16 management: summary of updated NICE guidance. *BMJ* 2019;366:l4486. doi:  
17  
18 10.1136/bmj.l4486  
19  
20 19. White J, Paton JY, Niven R, et al. Guidelines for the diagnosis and management of asthma: a look  
21  
22 at the key differences between BTS/SIGN and NICE. *Thorax* 2018;73(3):293-97. doi:  
23  
24 10.1136/thoraxjnl-2017-211189  
25  
26 20. Zwerink M, Kerstjens HA, Palen J, et al. (Cost-)effectiveness of self-treatment of exacerbations in  
27  
28 patients with COPD: 2 years follow-up of a RCT. *Respirology* 2016;21(3):497-503. doi:  
29  
30 doi:10.1111/resp.12697  
31  
32  
33 21. Hughes ME, Waite LJ, Hawkey LC, et al. A Short Scale for Measuring Loneliness in Large Surveys:  
34  
35 Results From Two Population-Based Studies. *Research on aging* 2004;26(6):655-72. doi:  
36  
37 10.1177/0164027504268574  
38  
39  
40 22. Rose TC, Mason K, Pennington A, et al. Inequalities in COVID19 mortality related to ethnicity and  
41  
42 socioeconomic deprivation. *medRxiv* 2020:2020.04.25.20079491. doi:  
43  
44 10.1101/2020.04.25.20079491  
45  
46  
47 23. Royal College of Physicians. Hiding in plain sight: Treating tobacco dependency in the NHS  
48  
49 [https://www.rcplondon.ac.uk/projects/outputs/hiding-plain-sight-treating-tobacco-](https://www.rcplondon.ac.uk/projects/outputs/hiding-plain-sight-treating-tobacco-dependency-nhs)  
50  
51 [dependency-nhs](https://www.rcplondon.ac.uk/projects/outputs/hiding-plain-sight-treating-tobacco-dependency-nhs), 2018.  
52  
53  
54 24. Hopkinson NS, Rossi N, El-Sayed Moustafa J, et al. Current tobacco smoking and risk from COVID-  
55  
56 19: results from a population symptom app in over 2.4 million people. *medRxiv*  
57  
58 2020:2020.05.18.20105288. doi: 10.1101/2020.05.18.20105288  
59  
60

- 1  
2  
3 25. National Institute for Clinical Excellence. COVID-19 rapid guideline: community-based care of  
4 patients with chronic obstructive pulmonary disease (COPD). *Available from:*  
5  
6 <https://www.nice.org.uk/guidance/ng168> 2020  
7  
8  
9  
10 26. Wang C, Pan R, Wan X, et al. A longitudinal study on the mental health of general population  
11 during the COVID-19 epidemic in China. *Brain Behav Immun* 2020;87:40-48. doi:  
12 10.1016/j.bbi.2020.04.028 [published Online First: 2020/04/17]  
13  
14  
15  
16 27. Zhang MW, Ho RC, Cheung MW, et al. Prevalence of depressive symptoms in patients with  
17 chronic obstructive pulmonary disease: a systematic review, meta-analysis and meta-  
18 regression. *Gen Hosp Psychiatry* 2011;33(3):217-23. doi:  
19 10.1016/j.genhosppsy.2011.03.009 [published Online First: 2011/05/24]  
20  
21  
22  
23  
24  
25  
26  
27  
28  
29  
30  
31  
32  
33  
34  
35  
36  
37  
38  
39  
40  
41  
42  
43  
44  
45  
46  
47  
48  
49  
50  
51  
52  
53  
54  
55  
56  
57  
58  
59  
60

1  
2  
3  
4  
5  
6  
7  
8  
9  
10  
11  
12  
13  
14  
15  
16  
17  
18  
19  
20  
21  
22  
23  
24  
25  
26  
27  
28  
29  
30  
31  
32  
33  
34  
35  
36  
37  
38  
39  
40  
41  
42  
43  
44  
45  
46  
47  
48  
49  
50  
51  
52  
53  
54  
55  
56  
57  
58  
59  
60

Figure 1: A bar chart of median anxiety level by age group

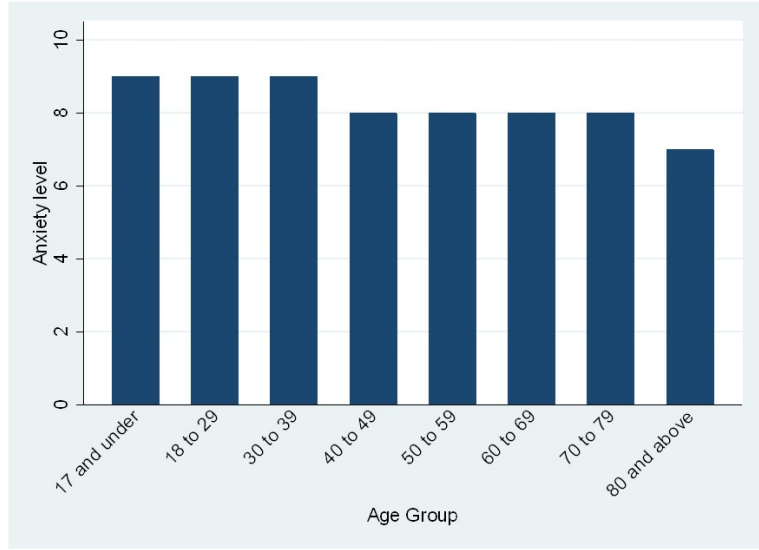

We conducted the Kruskal-Wallis H test to determine if there is a statistically significant difference between anxiety levels in different age groups. This test was selected due to the marked left shift in the data. Sample sizes in each group are reported in table 2. This test demonstrated statistically significant differences between groups (chi-squared = 158.895 with 7 d.f., probability = 0.0001).

1  
2  
3 **Respiratory patient experience of measures to reduce risk of COVID-19: findings from a descriptive**  
4 **cross-sectional UK wide survey**  
5  
6

7  
8 **– ONLINE SUPPLEMENT**  
9

10  
11 Authors: Keir EJ Philip<sup>1</sup>, Andrew Cumella<sup>2</sup>, Joe Farrington-Douglas<sup>2</sup>, Michael Laffan<sup>2</sup>, Nicholas S  
12  
13 Hopkinson<sup>1,2</sup>,  
14

15  
16 <sup>1</sup>National Heart and Lung Institute, Imperial College London  
17

18 <sup>2</sup>Asthma UK and British Lung Foundation Partnership  
19

20  
21 Corresponding Author: Dr Keir Philip  
22

23  
24 National Heart and Lung Institute  
25

26 Imperial College London  
27

28 Royal Brompton Hospital Campus  
29

30 Fulham Rd  
31

32 London SW3 6NP  
33

34 [k.philip@imperial.ac.uk](mailto:k.philip@imperial.ac.uk)  
35  
36  
37  
38  
39  
40  
41  
42  
43  
44  
45  
46  
47  
48  
49  
50  
51  
52  
53  
54  
55  
56  
57  
58  
59  
60

## SURVEY QUESTIONS AND POSSIBLE RESPONSES:

What is your age? 17 and under; 18-29; 30-39; 40-49; 50-59; 60-69; 70-79; 80+ What is your gender? Male; Female; Other

What nation do you live in? England; Northern Ireland; Scotland; Wales

Have you ever been told that you have 'difficult', 'brittle' or 'severe' asthma? (AUK survey only) Yes; No; Not sure

What is your main lung diagnosis? Asthma; COPD (chronic obstructive pulmonary disease); Bronchiectasis; ILD (interstitial lung disease); I do not have a lung condition; Other

Do you receive pulmonary rehabilitation as part of your care? Yes; No.

When do you get out of breath? (MRC dyspnoea scale options) (BLF survey only)

- I'm not troubled by being out of breath, except on strenuous exercise
- I'm short of breath when hurrying on the level or walking up a slight hill
- I walk slower than most people on the level, stop after a mile or so, or stop after 15 minutes of walking at my own pace
- I stop for breath after walking about 100 yards or after a few minutes on level ground
- I'm too breathless to leave the house, or breathless when dressing and undressing

Are you currently following the government's 'shielding' advice? Yes; No.

Have you received a letter or text message advising you to shield? Yes; No; Don't know.

Did you have the flu jab this winter? Yes; No; Don't know.

Have you seen guidance or advice on coronavirus from Asthma UK or the British Lung Foundation? Yes; No.

How did you see this advice? Via email; On Twitter; On Facebook; On the AUK and/or BLF websites.

Where do you mainly get your information about coronavirus? TV; Radio; News websites; AUK / BLF websites; AUK /BLF social media; Other social media; Friends and family.

What was it about the advice you saw that wasn't helpful? It was too complicated; There was not enough detail; I didn't trust it; It was badly presented; It couldn't answer my query.

The Government? Very helpful; Helpful; Neither helpful nor unhelpful; Not helpful; Not helpful at all; I have not seen their advice.

What was it about the advice you saw that wasn't helpful? It was too complicated; There was not enough detail; I didn't trust it; It was badly presented; It couldn't answer my query

Would you like more information on any of the following during the coronavirus outbreak? Yes, No.

Are you currently suffering from any coronavirus symptoms? Yes; No; Not sure.

Are you following isolation advice? Yes; No.



1  
2  
3 How confident are you about following advice to self-isolate or shield? Very confident; Somewhat  
4 confident; Neither confident nor not confident; Not very confident; Not confident at all.  
5

6 How confident are you that you will be able to access food and other provisions if you have to self-  
7 isolate or shield? Very confident; Somewhat confident; Neither confident nor not confident; Not  
8 very confident; Not confident at all.  
9

10 Do you have enough medicines for your needs at the moment? Yes; No.

11 Are you registered to order prescriptions online from your GP? Yes; No.

12 Have you had a look at online inhaler technique videos to check that you are using your inhalers  
13 properly? Yes; No; I don't use inhalers.

14 Do you have a written self-management plan for your condition? Yes; No.

15 In general, how well prepared do you feel for coronavirus? 1-10, with 10 being most prepared

16 In general, how anxious do you feel about coronavirus? 1-10, with 10 being most anxious

17 Which of the following apply to you?

- 18  
19  
20  
21  
22  
23  
24  
25 - I'm concerned about my lung condition  
26 - I'm concerned about the health of my family members  
27 - I'm coping well  
28 - I'm having trouble getting groceries  
29 - I'm worried about my financial situation due to missed work  
30 - I can't get the prescriptions I need  
31 - None of the above  
32 - Other  
33  
34

35 Have you used any of these services due to coronavirus, or concerns about its symptoms?

- 36  
37 - NHS 111 (online checker)  
38 - NHS 111 (telephone advice)  
39 - GP  
40 - Pharmacy  
41 - A&E  
42 - BLF or AUK nurse phone  
43 - Other  
44  
45

46 Has any of the following happened to you because of the way the NHS is working at the moment?

- 47  
48 - I have had to have a GP appointment conducted over the phone / remotely  
49 - My regular care for my lung condition at the hospital has been cancelled  
50 - My regular care for my lung condition at the GP has been cancelled  
51 - Pulmonary rehabilitation classes were cancelled  
52 - I have had to do pulmonary rehabilitation exercises at home  
53 - None of the above  
54 - Other  
55  
56

57 Are you able to perform your job at home? Yes; No; I'm not in work.  
58  
59  
60

1  
2  
3 How supportive have your workplace been during the coronavirus outbreak? Very supportive;  
4 Supportive; Somewhat supportive; Not supportive; Not supportive at all.  
5

6 Are you keeping physically active, or are able to do any exercise at home? Yes; No.  
7

8 Which of the following are you doing to stay active while at home?  
9

- 10 - Housework
- 11 - Gardening
- 12 - Going on walks
- 13 - Yoga
- 14 - Cycling
- 15 - Running
- 16 - Other
- 17
- 18

19 If you smoke, are you planning to try to quit smoking to protect yourself from coronavirus? Yes; No; I  
20 don't smoke.  
21

22 Are you actively self-isolating due to coronavirus? Yes; No.  
23

24 Do you live alone? Yes; No.  
25

26 How often do you feel you lack companionship? Hardly ever; Some of the time; Often.  
27

28 How often do you feel left out of things? Hardly ever; Some of the time; Often.  
29

30 How often do you feel isolated from others? Hardly ever; Some of the time; Often.  
31  
32  
33  
34  
35  
36  
37  
38  
39  
40  
41  
42  
43  
44  
45  
46  
47  
48  
49  
50  
51  
52  
53  
54  
55  
56  
57  
58  
59  
60

Table E1: Loneliness, Isolation, Anxiety, and Concerns

|                                                   | Percentage       | Number of observations |
|---------------------------------------------------|------------------|------------------------|
| <b>Domestic Isolation</b>                         |                  |                        |
| Live alone                                        | 13.06 %          | 1,241                  |
| Does not live alone                               | 86.94 %          | 8,260                  |
| <b>Loneliness</b>                                 |                  |                        |
| Feels lacks companionship                         |                  |                        |
| Hardly ever                                       | 48.91 %          | 4,643                  |
| Some of the time                                  | 39.84 %          | 3,782                  |
| Often                                             | 11.25 %          | 1,068                  |
| Feels left out of things                          |                  |                        |
| Hardly ever                                       | 46.73 %          | 4,434                  |
| Some of the time                                  | 40.84 %          | 3,875                  |
| Often                                             | 12.43 %          | 1,179                  |
| Feels isolated from others                        |                  |                        |
| Hardly ever                                       | 34.34 %          | 3,261                  |
| Some of the time                                  | 47.21 %          | 4,483                  |
| Often                                             | 18.45 %          | 1,752                  |
|                                                   | <b>Mean (SD)</b> | <b>N</b>               |
| <b>Overall loneliness score (all respondents)</b> |                  |                        |
|                                                   | 5.12 (1.80)      | 9,458                  |
| Loneliness by gender                              |                  |                        |
| Male                                              | 4.74 (1.72)      | 1,728                  |
| Female                                            | 5.21 (1.81)      | 7,652                  |
| Loneliness by age                                 |                  |                        |
| 17 and under                                      | 4.81 (1.68)      | 441                    |
| 18 to 29                                          | 5.65 (1.84)      | 962                    |
| 30 to 39                                          | 5.20 (1.82)      | 1,978                  |
| 40 to 49                                          | 4.96(1.78)       | 2,550                  |
| 50 to 59                                          | 5.00 (1.75)      | 1,794                  |
| 60 to 69                                          | 5.24 (1.83)      | 1,064                  |
| 70 to 79                                          | 5.03 (1.74)      | 532                    |
| 80 and above                                      | 5.26 (1.79)      | 69                     |
| Loneliness by main diagnosis                      |                  |                        |
| Asthma                                            | 5.06 (1.79)      | 7,936                  |
| COPD                                              | 5.56 (1.85)      | 957                    |
| Bronchiectasis                                    | 5.18(1.71)       | 357                    |
| ILD                                               | 5.54 (1.92)      | 163                    |
| Other                                             | 5.40 (1.84)      | 45                     |
| Loneliness by shielding                           |                  |                        |
| Actively shielding                                | 5.23 (1.81)      | 6,804                  |
| Not actively shielding                            | 4.85 (1.74)      | 2,654                  |
| <b>Anxiety</b>                                    |                  |                        |
| How anxious do you feel? (1-10)                   | 8.03 (2.07)      | 9,495                  |
| Anxiety by gender                                 |                  |                        |

|                             |                                |             |       |
|-----------------------------|--------------------------------|-------------|-------|
|                             | Male                           | 7.55 (2.28) | 1,728 |
|                             | Female                         | 8.13 (1.99) | 7,691 |
| <b>Anxiety by age</b>       |                                |             |       |
|                             | 17 and under                   | 8.14 (2.11) | 442   |
|                             | 18 to 29                       | 8.23 (1.90) | 967   |
|                             | 30 to 39                       | 8.24 (1.97) | 1,981 |
|                             | 40 to 49                       | 8.14 (1.96) | 2,558 |
|                             | 50 to 59                       | 8.00 (2.11) | 1,803 |
|                             | 60 to 69                       | 7.60 (2.27) | 1,066 |
|                             | 70 to 79                       | 7.32 (2.18) | 536   |
|                             | 80 and above                   | 7.03 (2.33) | 72    |
| <b>Anxiety by diagnosis</b> |                                |             |       |
|                             | Asthma                         | 8.11 (2.01) | 7,959 |
|                             | COPD                           | 7.57 (2.31) | 960   |
|                             | Bronchiectasis                 | 7.64 (2.14) | 362   |
|                             | ILD                            | 7.51 (2.24) | 168   |
|                             | Other                          | 7.76 (2.23) | 46    |
|                             | Actively shielding             | 8.06 (2.08) | 6,829 |
|                             | Not actively shielding         | 7.94 (2.03) | 2,666 |
| <b>Feels coping well</b>    |                                | 25.90 %     | 2,465 |
| <b>By Gender</b>            |                                |             |       |
|                             | Male                           | 34.39 %     | 596   |
|                             | Female                         | 23.96 %     | 1,844 |
| <b>By Age</b>               |                                |             |       |
|                             | 17 and under                   | 22.97 %     | 102   |
|                             | 18 to 29                       | 17.46 %     | 169   |
|                             | 30 to 39                       | 19.20 %     | 381   |
|                             | 40 to 49                       | 24.38 %     | 624   |
|                             | 50 to 59                       | 26.74 %     | 483   |
|                             | 60 to 69                       | 37.50 %     | 402   |
|                             | 70 to 79                       | 47.21 %     | 254   |
|                             | 80 and above                   | 45.83 %     | 33    |
| <b>By diagnosis</b>         |                                |             |       |
|                             | Asthma                         | 24.33 %     | 1,940 |
|                             | COPD                           | 34.79 %     | 335   |
|                             | Bronchiectasis                 | 31.96 %     | 116   |
|                             | ILD                            | 34.91 %     | 59    |
|                             | Other                          | 32.61 %     | 15    |
|                             | Bronchiectasis                 | 8.26 %      | 30    |
|                             | ILD                            | 12.43 %     | 21    |
|                             | Other                          | 13 %        | 6     |
| <b>Concerns</b>             |                                |             |       |
|                             | Concerned about lung condition | 64.25 %     | 6,115 |

|                                                        |         |       |
|--------------------------------------------------------|---------|-------|
| By Gender                                              |         |       |
| Male                                                   | 57.24 % | 992   |
| Female                                                 | 65.88 % | 5075  |
| By Age                                                 |         |       |
| 17 and under                                           | 41.22 % | 183   |
| 18 to 29                                               | 73.14 % | 708   |
| 30 to 39                                               | 71.47 % | 1,418 |
| 40 to 49                                               | 68.71 % | 1,759 |
| 50 to 59                                               | 62.24 % | 1,124 |
| 60 to 69                                               | 54.76 % | 587   |
| 70 to 79                                               | 48.14 % | 259   |
| 80 and above                                           | 50.00 % | 36    |
| By diagnosis                                           |         |       |
| Asthma                                                 | 64.94 % | 5,179 |
| COPD                                                   | 56.80 % | 547   |
| Bronchiectasis                                         | 67.77 % | 246   |
| ILD                                                    | 66.86 % | 113   |
| Other                                                  | 65.22 % | 30    |
| Concerned about family                                 | 61.50 % | 5,854 |
| By Gender                                              |         |       |
| Male                                                   | 54.99 % | 953   |
| Female                                                 | 63.03 % | 4,855 |
| By Age                                                 |         |       |
| 17 and under                                           | 60.36 % | 268   |
| 18 to 29                                               | 65.91 % | 638   |
| 30 to 39                                               | 66.33 % | 1,316 |
| 40 to 49                                               | 64.02 % | 1,639 |
| 50 to 59                                               | 60.24 % | 1,088 |
| 60 to 69                                               | 53.82 % | 1,072 |
| 70 to 79                                               | 47.21 % | 538   |
| 80 and above                                           | 38.89 % | 72    |
| By diagnosis                                           |         |       |
| Asthma                                                 | 63.32 % | 5,050 |
| COPD                                                   | 51.40 % | 495   |
| Bronchiectasis                                         | 53.72 % | 195   |
| ILD                                                    | 49.11 % | 83    |
| Other                                                  | 67.39 % | 31    |
| Concerned about financial situation due to missed work | 18.61 % | 1,771 |
| By Gender                                              |         |       |
| Male                                                   | 18.58 % | 322   |
| Female                                                 | 18.64 % | 1,436 |
| By Age                                                 |         |       |

|                |         |       |
|----------------|---------|-------|
| 17 and under   | 13.51 % | 60    |
| 18 to 29       | 26.96 % | 261   |
| 30 to 39       | 22.73 % | 451   |
| 40 to 49       | 22.50 % | 576   |
| 50 to 59       | 18.72 % | 338   |
| 60 to 69       | 6.62 %  | 71    |
| 70 to 79       | 0.74 %  | 4     |
| 80 and above   | 1.39 %  | 1     |
|                |         |       |
| By diagnosis   |         |       |
| Asthma         | 20.43 % | 1,629 |
| COPD           | 8.83 %  | 85    |
| Bronchiectasis | 8.26 %  | 30    |
| ILD            | 12.43 % | 21    |
| Other          | 13 %    | 6     |

Table E2: Practical Preparedness

|                                                                 | Percentage  | Number of observations |
|-----------------------------------------------------------------|-------------|------------------------|
| <b>Sources of Information</b>                                   |             |                        |
| Government Letter                                               |             |                        |
| Has received                                                    | 19.54 %     | 1,855                  |
| Has not received                                                | 78.98 %     | 7,498                  |
| Does not know                                                   | 1.49 %      | 141                    |
| Actively shielding of those who have received government letter | 97.83 %     | 1,804                  |
| Main sources of COVID info                                      |             |                        |
| TV                                                              | 72.98 %     | 6,946                  |
| Radio                                                           | 11.56 %     | 1,100                  |
| New websites                                                    | 50.34 %     | 4,791                  |
| AUK/BLF website                                                 | 17.49 %     | 1,665                  |
| AUK/BLF social media                                            | 14.36 %     | 1,367                  |
| Other social media                                              | 24.85 %     | 2,365                  |
| Friends and Family                                              | 8.34 %      | 794                    |
| Would like more information on:                                 |             |                        |
| Symptoms                                                        | 35.26 %     | 3,356                  |
| How to help their community                                     | 6.60 %      | 628                    |
| Financial help                                                  | 14.57 %     | 1,387                  |
| Decisions possibly required if a person I care for gets ill     | 28.20 %     | 2,684                  |
| Decisions possibly required if I get ill                        | 48.95 %     | 4,659                  |
| How to manage my lung condition during coronavirus              | 65.26 %     | 6,211                  |
| How to look after my mental health                              | 31.14 %     | 2,964                  |
| How to manage being at home for so long                         | 26.79 %     | 2,550                  |
| I do not need more information on coronavirus                   | 13.05 %     | 1,242                  |
| <b>Confidence</b>                                               |             |                        |
| How well prepared do you feel? (1-10)                           | Mean (SD)   | Observations           |
|                                                                 | 6.41 (1.7)  | 9,490                  |
| By Gender                                                       |             |                        |
| Male                                                            | 6.63 (1.75) | 1,729                  |
| Female                                                          | 6.36 (1.80) | 1,683                  |
| By Age                                                          |             |                        |
| 17 and under                                                    | 6.41 (1.70) | 444                    |
| 18 to 29                                                        | 5.94 (1.71) | 967                    |
| 30 to 39                                                        | 6.07 (1.74) | 1,982                  |
| 40 to 49                                                        | 6.36 (1.75) | 2,555                  |
| 50 to 59                                                        | 6.60 (1.78) | 1,803                  |
| 60 to 69                                                        | 6.89 (1.85) | 1,067                  |
| 70 to 79                                                        | 7.12 (1.76) | 533                    |
| 80 and above                                                    | 6.92 (1.90) | 70                     |
| By diagnosis                                                    |             |                        |

|  |                                                      |             |       |
|--|------------------------------------------------------|-------------|-------|
|  | Asthma                                               | 6.36 (1.76) | 7,958 |
|  | COPD                                                 | 6.68 (2.00) | 657   |
|  | Bronchiectasis                                       | 6.63 (1.88) | 361   |
|  | ILD                                                  | 6.79 (1.89) | 168   |
|  | Other                                                | 6.50 (1.80) | 46    |
|  |                                                      |             |       |
|  | <b>Confidence following government advice (1-10)</b> | 4.17 (0.85) | 9,480 |
|  | <b>By Gender</b>                                     |             |       |
|  | Male                                                 | 4.15 (0.86) | 1,727 |
|  | Female                                               | 4.17(0.86)  | 7,675 |
|  |                                                      |             |       |
|  | <b>By Age</b>                                        |             |       |
|  | 17 and under                                         | 4.27 (0.75) | 440   |
|  | 18 to 29                                             | 4.06 (0.84) | 965   |
|  | 30 to 39                                             | 4.05 (0.92) | 1,975 |
|  | 40 to 49                                             | 4.12 (0.87) | 2,552 |
|  | 50 to 59                                             | 4.19 (0.85) | 1,802 |
|  | 60 to 69                                             | 4.36 (0.79) | 1,068 |
|  | 70 to 79                                             | 4.47 (0.67) | 537   |
|  | 80 and above                                         | 4.30 (0.80) | 71    |
|  |                                                      |             |       |
|  | <b>By diagnosis</b>                                  |             |       |
|  | Asthma                                               | 4.14 (0.87) | 7,944 |
|  | COPD                                                 | 4.34 (0.81) | 959   |
|  | Bronchiectasis                                       | 4.31 (0.78) | 362   |
|  | ILD                                                  | 4.42 (0.72) | 169   |
|  | Other                                                | 4.26 (0.80) | 46    |
|  |                                                      |             |       |
|  | <b>Problems accessing groceries</b>                  | 21.95 %     | 2,089 |
|  | <b>By Gender</b>                                     |             |       |
|  | Male                                                 | 18.29 %     | 317   |
|  | Female                                               | 22.74 %     | 1,752 |
|  |                                                      |             |       |
|  | <b>By Age</b>                                        |             |       |
|  | 17 and under                                         | 18.47 %     | 82    |
|  | 18 to 29                                             | 23.35 %     | 226   |
|  | 30 to 39                                             | 24.80 %     | 492   |
|  | 40 to 49                                             | 22.30 %     | 571   |
|  | 50 to 59                                             | 19.16 %     | 346   |
|  | 60 to 69                                             | 22.39 %     | 240   |
|  | 70 to 79                                             | 18.22 %     | 98    |
|  | 80 and above                                         | 19.44 %     | 14    |
|  |                                                      |             |       |
|  | <b>By diagnosis</b>                                  |             |       |
|  | Asthma                                               | 21.23 %     | 1,693 |
|  | COPD                                                 | 22.53 %     | 217   |
|  | Bronchiectasis                                       | 30.58 %     | 111   |
|  | ILD                                                  | 31.36 %     | 53    |
|  | Other                                                | 32.61 %     | 15    |
|  |                                                      |             |       |



|                                                                                                |                |         |       |
|------------------------------------------------------------------------------------------------|----------------|---------|-------|
| <b>Problems accessing prescriptions</b>                                                        |                | 7.28 %  | 693   |
| By Gender                                                                                      |                |         |       |
|                                                                                                | Male           | 6.52 %  | 113   |
|                                                                                                | Female         | 7.46 %  | 575   |
| By Age                                                                                         |                |         |       |
|                                                                                                | 17 and under   | 8.33 %  | 37    |
|                                                                                                | 18 to 29       | 10.23 % | 99    |
|                                                                                                | 30 to 39       | 8.62 %  | 171   |
|                                                                                                | 40 to 49       | 7.93 %  | 203   |
|                                                                                                | 50 to 59       | 5.43 %  | 98    |
|                                                                                                | 60 to 69       | 4.76 %  | 51    |
|                                                                                                | 70 to 79       | 5.39 %  | 29    |
|                                                                                                | 80 and above   | 2.78 %  | 2     |
| By diagnosis                                                                                   |                |         |       |
|                                                                                                | Asthma         | 7.72 %  | 616   |
|                                                                                                | COPD           | 4.78 %  | 46    |
|                                                                                                | Bronchiectasis | 6.06 %  | 22    |
|                                                                                                | ILD            | 2.96 %  | 5     |
|                                                                                                | Other          | 8.70 %  | 4     |
| <b>Have you used any of these services due to coronavirus, or concerns about its symptoms?</b> |                |         |       |
| <b>Used 111 Online</b>                                                                         |                | 19.23 % | 1,830 |
| By Gender                                                                                      |                |         |       |
|                                                                                                | Male           | 17.57 % | 304   |
|                                                                                                | Female         | 19.64 % | 1,513 |
| By Age                                                                                         |                |         |       |
|                                                                                                | 17 and under   | 24.32 % | 444   |
|                                                                                                | 18 to 29       | 23.35 % | 968   |
|                                                                                                | 30 to 39       | 26.41 % | 1,984 |
|                                                                                                | 40 to 49       | 21.80 % | 558   |
|                                                                                                | 50 to 59       | 16.06 % | 290   |
|                                                                                                | 60 to 69       | 8.68 %  | 93    |
|                                                                                                | 70 to 79       | 2.79 %  | 15    |
|                                                                                                | 80 and above   | 2.78 %  | 2     |
| By diagnosis                                                                                   |                |         |       |
|                                                                                                | Asthma         | 21.45 % | 1,711 |
|                                                                                                | COPD           | 6.65 %  | 64    |
|                                                                                                | Bronchiectasis | 10.19 % | 37    |
|                                                                                                | ILD            | 7.10 %  | 12    |
|                                                                                                | Other          | 13.04 % | 6     |
| <b>Used 111 Phone</b>                                                                          |                | 8.01 %  | 762   |
| By Gender                                                                                      |                |         |       |
|                                                                                                | Male           | 8.02 %  | 139   |

|                     |                |         |       |
|---------------------|----------------|---------|-------|
|                     | Female         | 8.00 %  | 616   |
| <b>By Age</b>       |                |         |       |
|                     | 17 and under   | 9.68 %  | 43    |
|                     | 18 to 29       | 10.12 % | 98    |
|                     | 30 to 39       | 11.19 % | 222   |
|                     | 40 to 49       | 8.67 %  | 222   |
|                     | 50 to 59       | 6.76 %  | 122   |
|                     | 60 to 69       | 3.26 %  | 35    |
|                     | 70 to 79       | 2.79 %  | 15    |
|                     | 80 and above   | 0.00 %  | 0     |
| <b>By diagnosis</b> |                |         |       |
|                     | Asthma         | 8.80 %  | 702   |
|                     | COPD           | 3.53 %  | 34    |
|                     | Bronchiectasis | 3.86 %  | 14    |
|                     | ILD            | 5.33 %  | 9     |
|                     | Other          | 6.52 %  | 3     |
| <b>Used A&amp;E</b> |                |         |       |
|                     |                | 1.11 %  | 106   |
| <b>By Gender</b>    |                |         |       |
|                     | Male           | 1.15 %  | 20    |
|                     | Female         | 1.10 %  | 85    |
| <b>By Age</b>       |                |         |       |
|                     | 17 and under   | 0.90 %  | 4     |
|                     | 18 to 29       | 1.14 %  | 11    |
|                     | 30 to 39       | 1.14 %  | 35    |
|                     | 40 to 49       | 1.45 %  | 37    |
|                     | 50 to 59       | 0.78 %  | 14    |
|                     | 60 to 69       | 0.28 %  | 3     |
|                     | 70 to 79       | 0.00 %  | 0     |
|                     | 80 and above   | 1.39 %  | 1     |
| <b>By diagnosis</b> |                |         |       |
|                     | Asthma         | 1.24 %  | 99    |
|                     | COPD           | 0.42 %  | 4     |
|                     | Bronchiectasis | 0.55 %  | 2     |
|                     | ILD            | 0.59 %  | 1     |
|                     | Other          | 0.00 %  | 0     |
| <b>Used GP</b>      |                |         |       |
|                     |                | 25.63 % | 2,439 |
| <b>By Gender</b>    |                |         |       |
|                     | Male           | 23.43 % | 406   |
|                     | Female         | 26.20 % | 7,703 |
| <b>By Age</b>       |                |         |       |
|                     | 17 and under   | 26.58 % | 118   |
|                     | 18 to 29       | 29.65 % | 287   |
|                     | 30 to 39       | 29.74 % | 590   |

|  |                                    |         |       |
|--|------------------------------------|---------|-------|
|  | 40 to 49                           | 28.83 % | 738   |
|  | 50 to 59                           | 24.97 % | 451   |
|  | 60 to 69                           | 16.60 % | 178   |
|  | 70 to 79                           | 10.97 % | 59    |
|  | 80 and above                       | 6.94 %  | 5     |
|  |                                    |         |       |
|  |                                    |         |       |
|  | <b>By diagnosis</b>                |         |       |
|  | Asthma                             | 27.18 % | 2,168 |
|  | COPD                               | 14.75 % | 142   |
|  | Bronchiectasis                     | 22.31 % | 81    |
|  | ILD                                | 22.49 % | 38    |
|  | Other                              | 21.74 % | 10    |
|  |                                    |         |       |
|  | <b>Used the pharmacy</b>           | 8.95 %  | 852   |
|  | <b>By Gender</b>                   |         |       |
|  | Male                               | 10.91 % | 189   |
|  | Female                             | 8.54 %  | 658   |
|  |                                    |         |       |
|  | <b>By Age</b>                      |         |       |
|  | 17 and under                       | 11.71 % | 52    |
|  | 18 to 29                           | 10.64 % | 103   |
|  | 30 to 39                           | 8.87 %  | 174   |
|  | 40 to 49                           | 9.49 %  | 243   |
|  | 50 to 59                           | 8.42 %  | 152   |
|  | 60 to 69                           | 7.46 %  | 80    |
|  | 70 to 79                           | 7.06 %  | 38    |
|  | 80 and above                       | 6.94 %  | 5     |
|  |                                    |         |       |
|  | <b>By diagnosis</b>                |         |       |
|  | Asthma                             | 9.19 %  | 733   |
|  | COPD                               | 8.20 %  | 79    |
|  | Bronchiectasis                     | 7.44 %  | 27    |
|  | ILD                                | 6.51 %  | 11    |
|  | Other                              | 4.35 %  | 2     |
|  |                                    |         |       |
|  | <b>Used BLF or AUK nurse phone</b> | 7.19 %  | 684   |
|  | <b>By Gender</b>                   |         |       |
|  | Male                               | 6.29 %  | 109   |
|  | Female                             | 7.40 %  | 570   |
|  |                                    |         |       |
|  | <b>By Age</b>                      |         |       |
|  | 17 and under                       | 9.23 %  | 41    |
|  | 18 to 29                           | 8.06 %  | 78    |
|  | 30 to 39                           | 8.87 %  | 176   |
|  | 40 to 49                           | 8.36 %  | 214   |
|  | 50 to 59                           | 7.14 %  | 129   |
|  | 60 to 69                           | 2.89 %  | 31    |
|  | 70 to 79                           | 2.23 %  | 12    |
|  | 80 and above                       | 0       | 0     |
|  |                                    |         |       |

|                           |         |       |
|---------------------------|---------|-------|
| By diagnosis              |         |       |
| Asthma                    | 8.13 %  | 648   |
| COPD                      | 1.56 %  | 15    |
| Bronchiectasis            | 3.86 %  | 14    |
| ILD                       | 2.96 %  | 5     |
| Other                     | 4.35 %  | 2     |
|                           |         |       |
| <b>Used none of these</b> | 55.45 % | 5,278 |
| By Gender                 |         |       |
| Male                      | 57.11 % | 1,007 |
| Female                    | 54.85 % | 4,225 |
|                           |         |       |
| By Age                    |         |       |
| 17 and under              | 48.65 % | 216   |
| 18 to 29                  | 50.52 % | 489   |
| 30 to 39                  | 47.33 % | 939   |
| 40 to 49                  | 52.19 % | 1,336 |
| 50 to 59                  | 56.92 % | 1,028 |
| 60 to 69                  | 69.50 % | 745   |
| 70 to 79                  | 78.44 % | 422   |
| 80 and above              | 83.33 % | 60    |
|                           |         |       |
| By diagnosis              |         |       |
| Asthma                    | 52.69 % | 4,202 |
| COPD                      | 73.00 % | 703   |
| Bronchiectasis            | 65.84 % | 239   |
| ILD                       | 62.72 % | 106   |
| Other                     | 60.87 % | 28    |
|                           |         |       |

**Additional Graphs of Anxiety and Loneliness by Age and Diagnosis**

**Anxiety by Diagnosis**

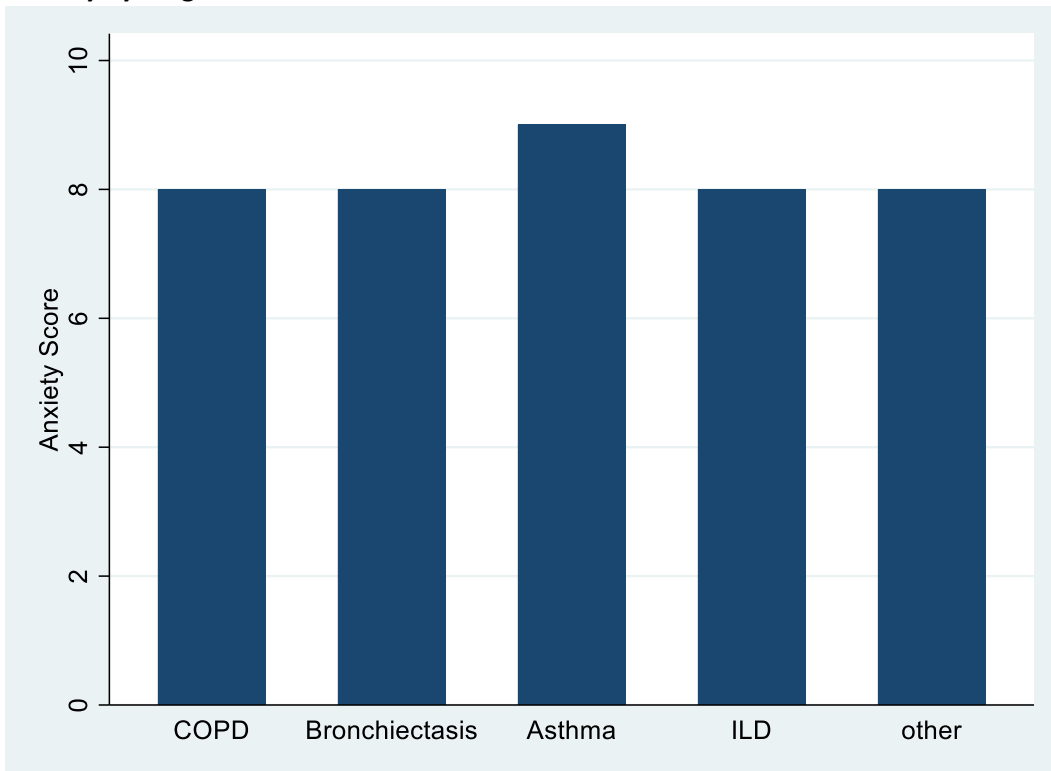

**Loneliness by Age Group**

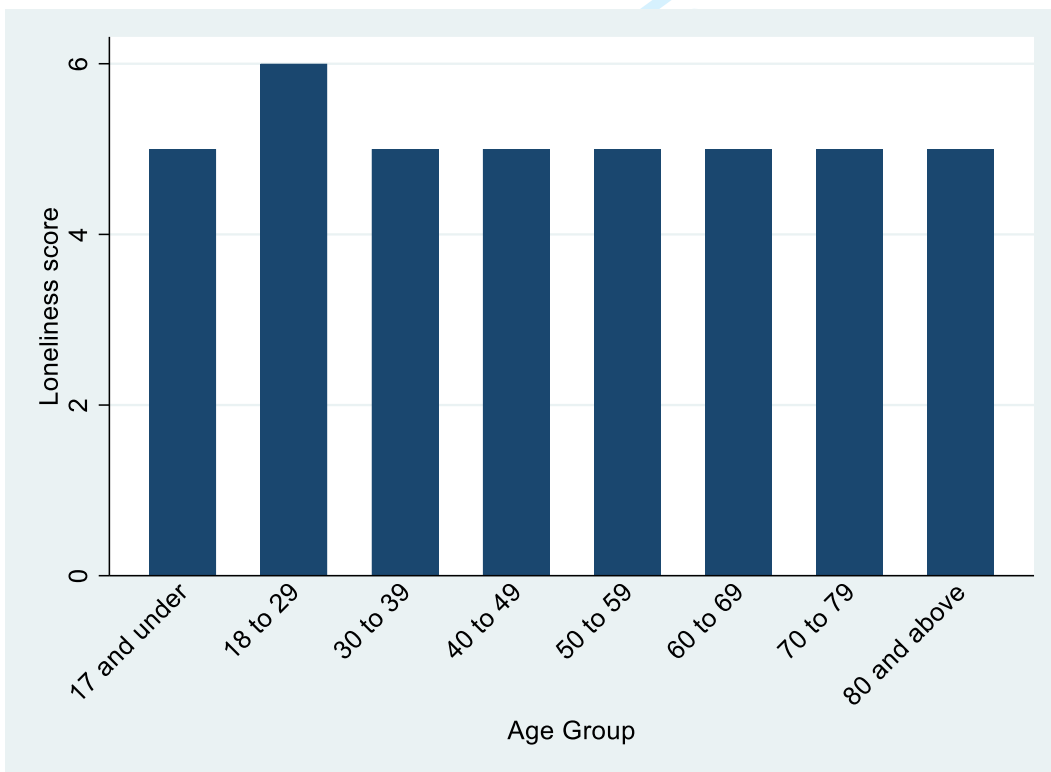

1  
2  
3  
4  
5  
6  
7  
8  
9  
10  
11  
12  
13  
14  
15  
16  
17  
18  
19  
20  
21  
22  
23  
24  
25  
26  
27  
28  
29  
30  
31  
32  
33  
34  
35  
36  
37  
38  
39  
40  
41  
42  
43  
44  
45  
46  
47  
48  
49  
50  
51  
52  
53  
54  
55  
56  
57  
58  
59  
60

Loneliness by Diagnosis

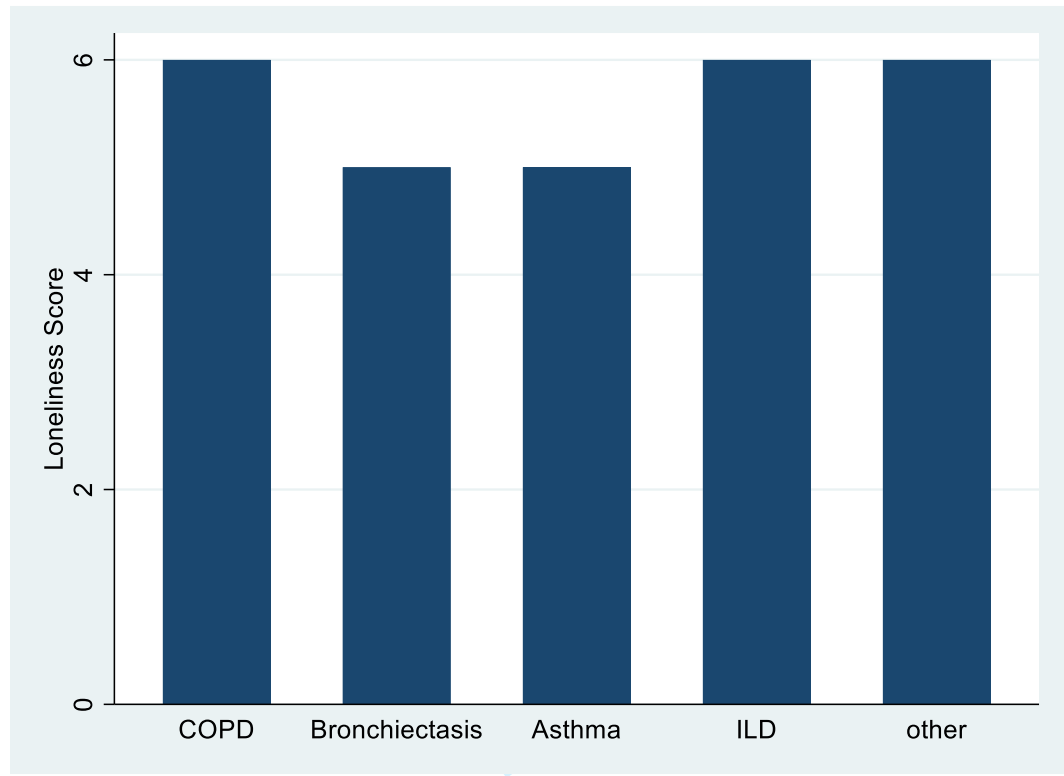

review only

# Reporting checklist for cross sectional study.

Based on the STROBE cross sectional guidelines.

## Instructions to authors

Complete this checklist by entering the page numbers from your manuscript where readers will find each of the items listed below.

Your article may not currently address all the items on the checklist. Please modify your text to include the missing information. If you are certain that an item does not apply, please write "n/a" and provide a short explanation.

Upload your completed checklist as an extra file when you submit to a journal.

In your methods section, say that you used the STROBE cross sectional reporting guidelines, and cite them as:

von Elm E, Altman DG, Egger M, Pocock SJ, Gøtzsche PC, Vandenbroucke JP. The Strengthening the Reporting of Observational Studies in Epidemiology (STROBE) Statement: guidelines for reporting observational studies.

|                           | Reporting Item                                                                                                                                     | Page Number |
|---------------------------|----------------------------------------------------------------------------------------------------------------------------------------------------|-------------|
| <b>Title and abstract</b> |                                                                                                                                                    |             |
| Title                     | <a href="#">#1a</a> Indicate the study's design with a commonly used term in the title or the abstract                                             | 1           |
| Abstract                  | <a href="#">#1b</a> Provide in the abstract an informative and balanced summary of what was done and what was found                                | 3           |
| <b>Introduction</b>       |                                                                                                                                                    |             |
| Background / rationale    | <a href="#">#2</a> Explain the scientific background and rationale for the investigation being reported                                            | 4           |
| Objectives                | <a href="#">#3</a> State specific objectives, including any prespecified hypotheses                                                                | 5           |
| <b>Methods</b>            |                                                                                                                                                    |             |
| Study design              | <a href="#">#4</a> Present key elements of study design early in the paper                                                                         | 5           |
| Setting                   | <a href="#">#5</a> Describe the setting, locations, and relevant dates, including periods of recruitment, exposure, follow-up, and data collection | 5           |

|    |                      |                      |                                                                                                                                                                                                                                                                                |                          |
|----|----------------------|----------------------|--------------------------------------------------------------------------------------------------------------------------------------------------------------------------------------------------------------------------------------------------------------------------------|--------------------------|
| 1  | Eligibility criteria | <a href="#">#6a</a>  | Give the eligibility criteria, and the sources and methods of selection of participants.                                                                                                                                                                                       | 5                        |
| 2  |                      |                      |                                                                                                                                                                                                                                                                                |                          |
| 3  |                      |                      |                                                                                                                                                                                                                                                                                |                          |
| 4  |                      |                      |                                                                                                                                                                                                                                                                                |                          |
| 5  |                      | <a href="#">#7</a>   | Clearly define all outcomes, exposures, predictors, potential confounders, and effect modifiers. Give diagnostic criteria, if applicable                                                                                                                                       | 5                        |
| 6  |                      |                      |                                                                                                                                                                                                                                                                                |                          |
| 7  |                      |                      |                                                                                                                                                                                                                                                                                |                          |
| 8  |                      |                      |                                                                                                                                                                                                                                                                                |                          |
| 9  |                      |                      |                                                                                                                                                                                                                                                                                |                          |
| 10 | Data sources /       | <a href="#">#8</a>   | For each variable of interest give sources of data and details of methods of assessment (measurement). Describe comparability of assessment methods if there is more than one group. Give information separately for for exposed and unexposed groups if applicable.           | 5                        |
| 11 | measurement          |                      |                                                                                                                                                                                                                                                                                |                          |
| 12 |                      |                      |                                                                                                                                                                                                                                                                                |                          |
| 13 |                      |                      |                                                                                                                                                                                                                                                                                |                          |
| 14 |                      |                      |                                                                                                                                                                                                                                                                                |                          |
| 15 |                      |                      |                                                                                                                                                                                                                                                                                |                          |
| 16 |                      |                      |                                                                                                                                                                                                                                                                                |                          |
| 17 |                      |                      |                                                                                                                                                                                                                                                                                |                          |
| 18 | Bias                 | <a href="#">#9</a>   | Describe any efforts to address potential sources of bias                                                                                                                                                                                                                      | 10                       |
| 19 |                      |                      |                                                                                                                                                                                                                                                                                |                          |
| 20 |                      |                      |                                                                                                                                                                                                                                                                                |                          |
| 21 | Study size           | <a href="#">#10</a>  | Explain how the study size was arrived at                                                                                                                                                                                                                                      | 6                        |
| 22 |                      |                      |                                                                                                                                                                                                                                                                                |                          |
| 23 | Quantitative         | <a href="#">#11</a>  | Explain how quantitative variables were handled in the analyses. If applicable, describe which groupings were chosen, and why                                                                                                                                                  | 6-9                      |
| 24 | variables            |                      |                                                                                                                                                                                                                                                                                |                          |
| 25 |                      |                      |                                                                                                                                                                                                                                                                                |                          |
| 26 |                      |                      |                                                                                                                                                                                                                                                                                |                          |
| 27 | Statistical          | <a href="#">#12a</a> | Describe all statistical methods, including those used to control for confounding                                                                                                                                                                                              | 6-9, Figure 1 and Tables |
| 28 | methods              |                      |                                                                                                                                                                                                                                                                                |                          |
| 29 |                      |                      |                                                                                                                                                                                                                                                                                |                          |
| 30 |                      |                      |                                                                                                                                                                                                                                                                                |                          |
| 31 | Statistical          | <a href="#">#12b</a> | Describe any methods used to examine subgroups and interactions                                                                                                                                                                                                                | Figure 1                 |
| 32 | methods              |                      |                                                                                                                                                                                                                                                                                |                          |
| 33 |                      |                      |                                                                                                                                                                                                                                                                                |                          |
| 34 |                      |                      |                                                                                                                                                                                                                                                                                |                          |
| 35 | Statistical          | <a href="#">#12c</a> | Explain how missing data were addressed                                                                                                                                                                                                                                        | n/a                      |
| 36 | methods              |                      |                                                                                                                                                                                                                                                                                |                          |
| 37 |                      |                      |                                                                                                                                                                                                                                                                                |                          |
| 38 |                      |                      |                                                                                                                                                                                                                                                                                |                          |
| 39 | Statistical          | <a href="#">#12d</a> | If applicable, describe analytical methods taking account of sampling strategy                                                                                                                                                                                                 | n/a                      |
| 40 | methods              |                      |                                                                                                                                                                                                                                                                                |                          |
| 41 |                      |                      |                                                                                                                                                                                                                                                                                |                          |
| 42 |                      |                      |                                                                                                                                                                                                                                                                                |                          |
| 43 | Statistical          | <a href="#">#12e</a> | Describe any sensitivity analyses                                                                                                                                                                                                                                              | n/a                      |
| 44 | methods              |                      |                                                                                                                                                                                                                                                                                |                          |
| 45 |                      |                      |                                                                                                                                                                                                                                                                                |                          |
| 46 | <b>Results</b>       |                      |                                                                                                                                                                                                                                                                                |                          |
| 47 |                      |                      |                                                                                                                                                                                                                                                                                |                          |
| 48 | Participants         | <a href="#">#13a</a> | Report numbers of individuals at each stage of study—eg numbers potentially eligible, examined for eligibility, confirmed eligible, included in the study, completing follow-up, and analysed. Give information separately for for exposed and unexposed groups if applicable. | 6                        |
| 49 |                      |                      |                                                                                                                                                                                                                                                                                |                          |
| 50 |                      |                      |                                                                                                                                                                                                                                                                                |                          |
| 51 |                      |                      |                                                                                                                                                                                                                                                                                |                          |
| 52 |                      |                      |                                                                                                                                                                                                                                                                                |                          |
| 53 |                      |                      |                                                                                                                                                                                                                                                                                |                          |
| 54 |                      |                      |                                                                                                                                                                                                                                                                                |                          |
| 55 |                      |                      |                                                                                                                                                                                                                                                                                |                          |
| 56 | Participants         | <a href="#">#13b</a> | Give reasons for non-participation at each stage                                                                                                                                                                                                                               | n/a                      |
| 57 |                      |                      |                                                                                                                                                                                                                                                                                |                          |
| 58 |                      |                      |                                                                                                                                                                                                                                                                                |                          |
| 59 |                      |                      |                                                                                                                                                                                                                                                                                |                          |
| 60 |                      |                      |                                                                                                                                                                                                                                                                                |                          |



|    |                    |                      |                                                                                                                                                                                                                   |                                      |
|----|--------------------|----------------------|-------------------------------------------------------------------------------------------------------------------------------------------------------------------------------------------------------------------|--------------------------------------|
| 1  | Participants       | <a href="#">#13c</a> | Consider use of a flow diagram                                                                                                                                                                                    | 6                                    |
| 2  |                    |                      |                                                                                                                                                                                                                   |                                      |
| 3  | Descriptive data   | <a href="#">#14a</a> | Give characteristics of study participants (eg demographic, clinical, social) and information on exposures and potential confounders. Give information separately for exposed and unexposed groups if applicable. | 6 and Table 1                        |
| 4  |                    |                      |                                                                                                                                                                                                                   |                                      |
| 5  |                    |                      |                                                                                                                                                                                                                   |                                      |
| 6  |                    |                      |                                                                                                                                                                                                                   |                                      |
| 7  |                    |                      |                                                                                                                                                                                                                   |                                      |
| 8  |                    |                      |                                                                                                                                                                                                                   |                                      |
| 9  |                    |                      |                                                                                                                                                                                                                   |                                      |
| 10 | Descriptive data   | <a href="#">#14b</a> | Indicate number of participants with missing data for each variable of interest                                                                                                                                   | Tables 1, 2, E1 and E2 (online supp) |
| 11 |                    |                      |                                                                                                                                                                                                                   |                                      |
| 12 |                    |                      |                                                                                                                                                                                                                   |                                      |
| 13 |                    |                      |                                                                                                                                                                                                                   |                                      |
| 14 |                    |                      |                                                                                                                                                                                                                   |                                      |
| 15 | Outcome data       | <a href="#">#15</a>  | Report numbers of outcome events or summary measures. Give information separately for exposed and unexposed groups if applicable.                                                                                 | n/a                                  |
| 16 |                    |                      |                                                                                                                                                                                                                   |                                      |
| 17 |                    |                      |                                                                                                                                                                                                                   |                                      |
| 18 |                    |                      |                                                                                                                                                                                                                   |                                      |
| 19 |                    |                      |                                                                                                                                                                                                                   |                                      |
| 20 |                    |                      |                                                                                                                                                                                                                   |                                      |
| 21 | Main results       | <a href="#">#16a</a> | Give unadjusted estimates and, if applicable, confounder-adjusted estimates and their precision (eg, 95% confidence interval). Make clear which confounders were adjusted for and why they were included          | 6                                    |
| 22 |                    |                      |                                                                                                                                                                                                                   |                                      |
| 23 |                    |                      |                                                                                                                                                                                                                   |                                      |
| 24 |                    |                      |                                                                                                                                                                                                                   |                                      |
| 25 |                    |                      |                                                                                                                                                                                                                   |                                      |
| 26 |                    |                      |                                                                                                                                                                                                                   |                                      |
| 27 | Main results       | <a href="#">#16b</a> | Report category boundaries when continuous variables were categorized                                                                                                                                             | 6                                    |
| 28 |                    |                      |                                                                                                                                                                                                                   |                                      |
| 29 |                    |                      |                                                                                                                                                                                                                   |                                      |
| 30 |                    |                      |                                                                                                                                                                                                                   |                                      |
| 31 | Main results       | <a href="#">#16c</a> | If relevant, consider translating estimates of relative risk into absolute risk for a meaningful time period                                                                                                      | n/a                                  |
| 32 |                    |                      |                                                                                                                                                                                                                   |                                      |
| 33 |                    |                      |                                                                                                                                                                                                                   |                                      |
| 34 |                    |                      |                                                                                                                                                                                                                   |                                      |
| 35 | Other analyses     | <a href="#">#17</a>  | Report other analyses done—e.g., analyses of subgroups and interactions, and sensitivity analyses                                                                                                                 | 6-9                                  |
| 36 |                    |                      |                                                                                                                                                                                                                   |                                      |
| 37 |                    |                      |                                                                                                                                                                                                                   |                                      |
| 38 |                    |                      |                                                                                                                                                                                                                   |                                      |
| 39 | <b>Discussion</b>  |                      |                                                                                                                                                                                                                   |                                      |
| 40 |                    |                      |                                                                                                                                                                                                                   |                                      |
| 41 | Key results        | <a href="#">#18</a>  | Summarise key results with reference to study objectives                                                                                                                                                          | 9-10                                 |
| 42 |                    |                      |                                                                                                                                                                                                                   |                                      |
| 43 | Limitations        | <a href="#">#19</a>  | Discuss limitations of the study, taking into account sources of potential bias or imprecision. Discuss both direction and magnitude of any potential bias.                                                       | 10                                   |
| 44 |                    |                      |                                                                                                                                                                                                                   |                                      |
| 45 |                    |                      |                                                                                                                                                                                                                   |                                      |
| 46 |                    |                      |                                                                                                                                                                                                                   |                                      |
| 47 |                    |                      |                                                                                                                                                                                                                   |                                      |
| 48 |                    |                      |                                                                                                                                                                                                                   |                                      |
| 49 | Interpretation     | <a href="#">#20</a>  | Give a cautious overall interpretation considering objectives, limitations, multiplicity of analyses, results from similar studies, and other relevant evidence.                                                  | 9-10                                 |
| 50 |                    |                      |                                                                                                                                                                                                                   |                                      |
| 51 |                    |                      |                                                                                                                                                                                                                   |                                      |
| 52 |                    |                      |                                                                                                                                                                                                                   |                                      |
| 53 |                    |                      |                                                                                                                                                                                                                   |                                      |
| 54 | Generalisability   | <a href="#">#21</a>  | Discuss the generalisability (external validity) of the study results                                                                                                                                             | 9-10                                 |
| 55 |                    |                      |                                                                                                                                                                                                                   |                                      |
| 56 |                    |                      |                                                                                                                                                                                                                   |                                      |
| 57 | <b>Other</b>       |                      |                                                                                                                                                                                                                   |                                      |
| 58 | <b>Information</b> |                      |                                                                                                                                                                                                                   |                                      |
| 59 |                    |                      |                                                                                                                                                                                                                   |                                      |
| 60 |                    |                      |                                                                                                                                                                                                                   |                                      |

1 Funding [#22](#) Give the source of funding and the role of the funders for the 1  
2 present study and, if applicable, for the original study on which the  
3 present article is based  
4  
5

6 Notes:  
7

- 8 • 12a: 6-9, Figure 1 and Tables
- 9
- 10 • 14a: 6 and Table 1
- 11
- 12
- 13 • 14b: Tables 1, 2, E1 and E2 (online supp) The STROBE checklist is distributed under the terms of the  
14 Creative Commons Attribution License CC-BY. This checklist was completed on 26. May 2020 using  
15 <https://www.goodreports.org/>, a tool made by the [EQUATOR Network](#) in collaboration with [Penelope.ai](#)  
16  
17  
18  
19  
20  
21  
22  
23  
24  
25  
26  
27  
28  
29  
30  
31  
32  
33  
34  
35  
36  
37  
38  
39  
40  
41  
42  
43  
44  
45  
46  
47  
48  
49  
50  
51  
52  
53  
54  
55  
56  
57  
58  
59  
60

# BMJ Open

## Respiratory patient experience of measures to reduce risk of COVID-19: findings from a descriptive cross-sectional UK wide survey

|                                 |                                                                                                                                                                                                                                                                                                                                                                                        |
|---------------------------------|----------------------------------------------------------------------------------------------------------------------------------------------------------------------------------------------------------------------------------------------------------------------------------------------------------------------------------------------------------------------------------------|
| Journal:                        | <i>BMJ Open</i>                                                                                                                                                                                                                                                                                                                                                                        |
| Manuscript ID                   | bmjopen-2020-040951.R2                                                                                                                                                                                                                                                                                                                                                                 |
| Article Type:                   | Original research                                                                                                                                                                                                                                                                                                                                                                      |
| Date Submitted by the Author:   | 25-Aug-2020                                                                                                                                                                                                                                                                                                                                                                            |
| Complete List of Authors:       | Philip, Keir; National Heart and Lung Institute<br>Cumella, Andrew; Asthma UK and British Lung Foundation Partnership<br>Farrington-Douglas, Joe; Asthma UK and British Lung Foundation Partnership<br>Laffan, Michael; Asthma UK and British Lung Foundation Partnership<br>Hopkinson, Nicholas; National Heart and Lung Institute; Asthma UK and British Lung Foundation Partnership |
| <b>Primary Subject Heading</b>: | Respiratory medicine                                                                                                                                                                                                                                                                                                                                                                   |
| Secondary Subject Heading:      | Medical management, Mental health, Patient-centred medicine                                                                                                                                                                                                                                                                                                                            |
| Keywords:                       | Public health < INFECTIOUS DISEASES, MENTAL HEALTH, RESPIRATORY MEDICINE (see Thoracic Medicine), Respiratory infections < THORACIC MEDICINE                                                                                                                                                                                                                                           |
|                                 |                                                                                                                                                                                                                                                                                                                                                                                        |

SCHOLARONE™  
Manuscripts



I, the Submitting Author has the right to grant and does grant on behalf of all authors of the Work (as defined in the below author licence), an exclusive licence and/or a non-exclusive licence for contributions from authors who are: i) UK Crown employees; ii) where BMJ has agreed a CC-BY licence shall apply, and/or iii) in accordance with the terms applicable for US Federal Government officers or employees acting as part of their official duties; on a worldwide, perpetual, irrevocable, royalty-free basis to BMJ Publishing Group Ltd ("BMJ") its licensees and where the relevant Journal is co-owned by BMJ to the co-owners of the Journal, to publish the Work in this journal and any other BMJ products and to exploit all rights, as set out in our [licence](#).

The Submitting Author accepts and understands that any supply made under these terms is made by BMJ to the Submitting Author unless you are acting as an employee on behalf of your employer or a postgraduate student of an affiliated institution which is paying any applicable article publishing charge ("APC") for Open Access articles. Where the Submitting Author wishes to make the Work available on an Open Access basis (and intends to pay the relevant APC), the terms of reuse of such Open Access shall be governed by a Creative Commons licence – details of these licences and which [Creative Commons](#) licence will apply to this Work are set out in our licence referred to above.

Other than as permitted in any relevant BMJ Author's Self Archiving Policies, I confirm this Work has not been accepted for publication elsewhere, is not being considered for publication elsewhere and does not duplicate material already published. I confirm all authors consent to publication of this Work and authorise the granting of this licence.

1  
2  
3 **Respiratory patient experience of measures to reduce risk of COVID-19: findings from a descriptive**  
4 **cross-sectional UK wide survey**  
5  
6  
7

8 Authors: Keir EJ Philip<sup>1</sup>, Andrew Cumella<sup>2</sup>, Joe Farrington-Douglas<sup>2</sup>, Michael Laffan<sup>2</sup>, Nicholas S  
9  
10 Hopkinson<sup>1,2</sup>,  
11  
12

13 <sup>1</sup>National Heart and Lung Institute, Imperial College London

14 <sup>2</sup>Asthma UK and British Lung Foundation Partnership  
15  
16  
17

18 Corresponding Author: Dr Keir Philip  
19

20  
21 National Heart and Lung Institute  
22

23 Imperial College London  
24

25 Royal Brompton Hospital Campus, Fulham Rd  
26

27 London SW3 6NP  
28

29 [k.philip@imperial.ac.uk](mailto:k.philip@imperial.ac.uk)  
30  
31  
32

33 ORCID iD: <https://orcid.org/0000-0001-9614-3580>  
34  
35  
36  
37

38 **Key Words:**  
39

40 COVID-19, respiratory, shielding, social distancing, long term condition, anxiety, loneliness  
41  
42  
43

44 **Contribution**  
45

46 KEJP, AC, JFD, ML, NSH developed the survey, KEJP performed the data analysis and wrote the first  
47  
48 draft. All authors contributed to revisions of this first draft and approved the final version.  
49  
50  
51

52 **Funding**  
53

54 KEJP was supported by the Imperial College Clinician Investigator Scholarship, which is managed  
55  
56 within Imperial College London, and does not have a specific award/grant number. The funders had  
57  
58 no say in the design and conduct of the study; collection, management, analysis, and interpretation  
59  
60

1  
2  
3 of the data; preparation, review, or approval of the manuscript; and decision to submit the  
4  
5 manuscript for publication.  
6  
7

#### 8 **Data availability statement** 9

10 All data relevant to the study are included in the article or uploaded as supplementary information  
11  
12  
13

#### 14 **Conflicts of interest** 15

16  
17 The authors report no conflicts of interest.  
18  
19

20 **Word Count:** 2584  
21  
22  
23  
24  
25  
26  
27  
28  
29  
30  
31  
32  
33  
34  
35  
36  
37  
38  
39  
40  
41  
42  
43  
44  
45  
46  
47  
48  
49  
50  
51  
52  
53  
54  
55  
56  
57  
58  
59  
60

1  
2  
3 **ABSTRACT** (262 words)  
4  
5

6 **Objectives:** To assess the experience of people with long-term respiratory conditions regarding the  
7  
8 impact of measures to reduce risk of COVID-19.  
9

10  
11 **Design:** Analysis of data (n=9,515) from the Asthma UK and British Lung Foundation partnership  
12  
13 COVID-19 survey collected online between 1<sup>st</sup> and 8<sup>th</sup> of April 2020.  
14  
15

16 **Setting:** Community  
17  
18

19 **Participants:** 9,515 people with self-reported long term respiratory conditions. 81% female, age  
20  
21 ranges from  $\leq 17$  years to 80 and above, from all nations of the UK. Long term respiratory conditions  
22  
23 reported included asthma (83%), Chronic Obstructive Pulmonary Disease (COPD) (10%),  
24  
25 bronchiectasis (4%), Interstitial Lung Disease (ILD) (2%), and 'other' (<1%) (e.g. lung cancer and  
26  
27 pulmonary endometriosis).  
28  
29

30  
31 **Outcome measures:** Study responses related to impacts on key elements of health care, as well as  
32  
33 practical, psychological and social consequences related to the COVID-19 pandemic and social  
34  
35 distancing measures.  
36  
37

38 **Results:** 45% reported disruptions to care, including cancellations of appointments, investigations,  
39  
40 pulmonary rehabilitation, treatment, and monitoring. Other practical impacts such as difficulty  
41  
42 accessing healthcare services for other issues, and getting basic necessities such as food, were also  
43  
44 common. 36% did not use online prescriptions and 54% had not accessed online inhaler technique  
45  
46 videos. Psycho-social impacts including anxiety, loneliness and concerns about personal health and  
47  
48 family were prevalent. 81% reported engaging in physical activity. Among the 11% who were smokers,  
49  
50 48% reported they were planning to quit smoking because of COVID-19.  
51  
52  
53

54 **Conclusions:** COVID-19 and related social distancing measures are having profound impacts on people  
55  
56 with chronic respiratory conditions. Urgent adaptation and signposting of services is required to  
57  
58 mitigate the negative health consequences of the COVID-19 response for this group.  
59  
60

### Strengths and limitations of this study

- This is one of the first studies in the UK to highlight the impact of COVID-19 related measures on people with long term health conditions.
- The study includes a large sample (n=9515) from broad range of respiratory conditions, age groups, and parts of the UK.
- Key gaps in healthcare provision/access are identified including online prescription and inhaler technique videos; self-management plans; smoking cessation support.
- Although a range of individuals are represented, the sample has a large percentage of people with asthma (83%) and is predominantly female (81%).
- A lack of data regarding disease severity, and further demographic information of interest such as socio-economic status, ethnicity and housing, limits the depth of interpretation possible.

### INTRODUCTION

COVID-19 is a particular threat for people with long term respiratory conditions, who are at greater risk of serious disease and death if they become infected<sup>1,2</sup>. Recommendations for respiratory patients include being especially careful regarding social distancing measures to reduce SARS-CoV-2 transmission. In the UK, for the most vulnerable a period of “social shielding”, avoiding face-to-face contact has been advised<sup>3,4</sup>, with twin aims of protecting individuals from infection and avoiding a peak of cases in the most vulnerable which might overwhelm the health and social care system. Measures to reduce the immediate impact of COVID-19 are likely to have some adverse consequences for the population’s health and wellbeing<sup>5-8</sup>, leading to a so called ‘third wave’ of COVID-19 related



1  
2  
3 morbidity and mortality in which detrimental health impacts for people with long-term conditions  
4 result from interruptions to care provision and health seeking behaviours<sup>9</sup>. This is of particular concern  
5 given the substantial level of unmet need related to respiratory disease<sup>10-15</sup>. Identification of health  
6 and wellbeing impacts is required to facilitate mitigation interventions, of which examples of  
7 successful approaches are being reported<sup>16</sup>.

8  
9  
10 Data on the experience of people with long term respiratory conditions regarding the impact of  
11 COVID-19 prevention measures is currently lacking<sup>17</sup>, but will be important for understanding of the  
12 impacts on these people, and to help guide current and future provision to where it is required.  
13  
14

## 15 16 17 18 19 20 21 22 23 24 25 **METHODS**

26  
27  
28 To assess the impact of measures to address COVID-19 on access to key elements of care<sup>18 19</sup> as well  
29 as the practical, psychological and emotional consequences of the current situation, we analysed data  
30 from an online survey carried out by the Asthma UK (AUK) and British Lung Foundation (BLF)  
31 Partnership between 1<sup>st</sup> and 8<sup>th</sup> of April 2020. The survey was developed by the authors, and other  
32 colleagues at the Asthma UK and British Lung Foundation (AUK-BLF) partnership, to improve  
33 understanding of the experiences of lockdown and coronavirus on people with lung conditions in the  
34 UK, and to find out how AUK-BLF can best support them. The topics were based on areas raised by  
35 patients and healthcare professionals as being of particularly vulnerable to disruption, and those  
36 having potentially important implications for disease management. The core survey was developed  
37 by both AUK and the BLF in partnership, with each adding a couple of questions specific to their patient  
38 group. In the Online Supplement the questions that only feature in the AUK or BLF versions are  
39 highlighted. The survey results for the core questions were then combined. Any single survey question  
40 responses are highlighted as such. The survey was promoted to supporters of both Asthma UK and  
41 the British Lung Foundation, and was conducted on Typeform. Initial response targets for the survey  
42 were 3,000 (AUK) and 1,000 (BLF). The survey was distributed to individuals on their mailing lists,  
43  
44  
45  
46  
47  
48  
49  
50  
51  
52  
53  
54  
55  
56  
57  
58  
59  
60

1  
2  
3 placed on the charities' websites, and advertised on social media (Facebook, Twitter, Instagram and  
4  
5 LinkedIn). Social distancing measures were announced by the UK Government on 23<sup>rd</sup> March. The text  
6  
7 of the survey is available in the online supplement. Furthermore, during the data collection period,  
8  
9 Public Health England (PHE) recommendations relevant to survey respondents included 1) All  
10  
11 members of the public were advised to stay at home, only being permitted to leave the house for a  
12  
13 small number of specific reasons. 2) Shielding of "people with severe respiratory conditions including  
14  
15 all cystic fibrosis, severe asthma and severe COPD" who were advised to "stay at home at all times  
16  
17 and avoid any face-to-face contact for a period of at least 12 weeks".  
18  
19

20  
21 The analysis presented focuses on questions relating to 1) Impacts on healthcare provision, 2) Social,  
22  
23 psychological and practical responses, and 3) Sources of support and information. Rating scales are  
24  
25 from zero (lowest) to ten (highest) unless otherwise specified, for questions relating to how well  
26  
27 prepared they felt, and levels of anxiety experienced. The 3 item UCLA Loneliness scale was used to  
28  
29 assess loneliness<sup>20</sup>. The survey questions and response options are provided in the Online Supplement.  
30  
31 Data are presented using descriptive statistics. Where a between group difference was of a potentially  
32  
33 clinically significant magnitude, this was tested using t-test or Kruskal-Wallis tests as appropriate.  
34  
35 Respiratory conditions were grouped into 'Asthma' and 'Chronic respiratory disease' (non-asthma) in  
36  
37 table 1 so that the composition of the sample was clearer for readers. These data were collected by  
38  
39 AUK-BLF as part of routine information gathering and marketing activities, which often relate to  
40  
41 topical issues for people with respiratory conditions, in this case COVID-19. All participants consented  
42  
43 to their responses being used for research, analysis and publication. Anonymised data were shared  
44  
45 with the authors for analysis. The Charity's information governance process supported this, consistent  
46  
47 with GDPR the General Data Protection Regulation (GDPR, the primary legislation regarding data  
48  
49 protection and privacy in the European Union), and additional external ethical approval was not  
50  
51 deemed necessary. Analyses were carried out using Stata V.14 (StataCorp). Data used here are not  
52  
53 being made publicly available.  
54  
55  
56  
57  
58  
59  
60

## Patient and Public Involvement

Patients and members of the public were not specifically involved in the design, conduct or reporting of this research. However, the primary focus of this research was to understand the impact of the COVID-19 risk reduction measures on people living with long-term respiratory conditions, and questions were shaped around issues being raised by patients and the public with AUK, BLF and the clinical staff involved in developing the survey.

## RESULTS

11,124 people started the AUK survey, of which 7,748 completed it, while 2,518 people started the BLF survey, of which 1,856 provided completed responses. Hence, the initial survey data included 9,604 full responses. Responses were then removed from people without a lung condition (n=25); people who completed the survey twice within the sampling period (n=24 BLF, n=21 AUK) and people who completed both surveys (n=19), which left 9,515 individuals' responses for analysis. Data presented here are the combined responses to the core questions which were the same in the BLF and AUK hosted surveys. The BLF hosted version contributed 1,787 responses, while the AUK hosted survey contributed 7,728 responses. Where the sum of total answers given is less than 9,515 this is due to non-response to that specific question. The surveys took respondents an average of (AUK) 8:36(m/s) and (BLF) 11:35(m/s) to complete. The exact response rate is not possible to establish given the method by which the survey was publicised including via social media. This final sample was 81% female, with age ranges from  $\leq 17$  years to 80 and above, and all nations of the UK represented. Reported lung diseases were 83% asthma, 10% COPD, 4% bronchiectasis, 2% Interstitial Lung Disease (ILD), and <1% 'other' for example lung cancer and pulmonary endometriosis (Table 1). Of people who completed the AUK hosted version of the survey which asked about severity of asthma, 28.25% (2,179) reported having 'difficult' 'severe' or 'brittle' asthma. The BLF hosted version of the survey included

1  
2  
3 an additional question on breathlessness, to which 32% of respondents with non-asthma diagnoses  
4 reported being severely breathless (MRC dyspnoea score  $\geq 4$ ).  
5  
6  
7  
8  
9

### 10 11 **Impacts on Healthcare provision**

12  
13  
14 Despite data collection occurring relatively early in the first wave of the UK pandemic, 45% reported  
15 disruptions in healthcare provision, including GP and hospital appointment cancellations affecting 10%  
16 and 8% of respondents respectively, with 31% reporting having appointments conducted remotely  
17 (e.g. by phone) (Table 2). Respondents reported various additional ways in which healthcare provision  
18 had been impacted by COVID-19 (under the freetext option 'other'), including cancelled operations,  
19 investigations, respiratory nurse appointments, and medication reviews. In addition, finding it difficult  
20 to get in contact with relevant care providers for advice and information. Despite being a population  
21 by definition with online access, one third did not access online prescription services and over half had  
22 not made use of online inhaler technique videos. Among the 11% who were smokers, 48% reported  
23 they were planning to quit smoking because of COVID-19. A majority of individuals did not have a  
24 written self-management plan despite the strong evidence base for this intervention<sup>19 21</sup>.  
25  
26  
27  
28  
29  
30  
31  
32  
33  
34  
35  
36  
37  
38

39 Reassuringly, respondents reported high levels of physical activity, with 81% being 'able to keep active  
40 or do exercise at home' (Table 2). Most frequently reported activities include walks (47%), housework  
41 (54%), and gardening (29%)(Table 2). In addition to the activities listed in table 2, 7% of respondents  
42 reported 'other' activities including home exercise bikes, trampolining, tennis, weights, skipping,  
43 home PR, Pilates, YouTube exercise videos, Zumba/dance and Wii fit.  
44  
45  
46  
47  
48  
49  
50  
51  
52  
53

### 54 **Social and psychological responses**

55  
56  
57 High levels of anxiety about COVID-19 were reported; mean(SD) anxiety level 8.03(2.07); slightly  
58 higher in women than men, 8.13(1.99) vs 7.55(2.28)(t-test  $p < 0.001$ ), and decreasing slightly with age  
59  
60

1  
2  
3 (Figure 1, Kruskal-Wallis  $p < 0.001$ ). Only 34% of men and 24% of women felt that they were 'coping  
4 well' (t-test for between group difference  $p < 0.001$ ). Older age groups were more likely to report  
5 coping well with 47% of 70 to 79-year olds, steadily decreasing to 17% in the 18 to 29 years old group  
6  
7 (Kruskal-Wallis  $p < 0.001$ ). Respondent had various concerns, most commonly reported being 'concern  
8 about lung condition' (64%), and concern about family (61%). Interestingly, both showing similar  
9 variations related to age and gender as that seen in anxiety and 'coping well', with a higher percentage  
10 of females, and younger people reporting concerns.  
11  
12

13  
14  
15  
16  
17  
18  
19 The majority (87%) of respondents lived with another person; 51% felt they lacked companionship  
20 'some of the time' or 'often', and 52% reported feeling left out of things 'some of the time' or 'often'.  
21  
22 66% of respondents felt 'isolated from others'. Combining the scores for these three statements  
23 (modified 3 item UCLA loneliness score),<sup>20</sup> 3 being the lowest score for loneliness and 9 the highest,  
24 the mean loneliness rating was 5.12(1.80), with broadly similar levels in women and men 5.21(1.81)  
25 vs 4.74(1.72), although the difference was statistically significant (t-test  $p < 0.001$ ). Similarly, although  
26 in this large sample the Kruskal-Wallis test showed values were not equal for age groups ( $p < 0.001$ )  
27 and disease types ( $p < 0.001$ ), the differences in loneliness ratings between them were relatively small  
28 (Online Table E1).  
29  
30  
31  
32  
33  
34  
35  
36  
37  
38  
39

40 Of note, responses in those who reported that they were actively shielding suggested only slightly  
41 higher levels of loneliness to those who were not, at 5.23 and 4.85 (t-test  $p < 0.001$ ) respectively (Table  
42 E1). 19.54% of respondents had received the government letter or text message advising them to  
43 shield, of whom 98% were doing so. Mean perceived preparedness for COVID-19 was 6.41(1.7) out of  
44 10. Again, although there were statistically significant differences related to gender (t-test  $p < 0.001$ ),  
45 age (Kruskal-Wallis  $p < 0.001$ ), and diagnosis (Kruskal-Wallis  $p < 0.001$ ) these were small in absolute  
46 terms, and as such unlikely to be of importance (Online Table E2).  
47  
48  
49  
50  
51  
52  
53  
54  
55  
56  
57  
58  
59  
60

### Sources of support and Information

1  
2  
3 Respondents reported having accessed various services to address concerns about coronavirus or its  
4 symptoms. These included NHS 111 online (19%) (an interactive website for the National Health  
5 Service that provides information, guidance and self-management support) which was used more  
6 commonly by younger adults (23 to 25% of under 40-year olds, compared with 3 to 9% of over 60  
7 years old, Kruskal-Wallis <0.001, Online Table E2) , despite the surveys being online which imply at  
8 least some level of digital literacy in all respondents. GPs had been used by 26% of respondents, again  
9 with a trend toward decreasing use in older (>60) age groups (Online Table E2). The NHS 111  
10 telephone service (a telephone service for non-emergency health advice and guidance) had been used  
11 by 8% of respondents with a similar decrease in use by older age groups. Though differences between  
12 conditions are seen this is likely due to certain conditions being more represented in certain age  
13 groups. For example, the same trends regarding age and NHS 111 online use were seen when asthma  
14 was considered alone. Only 1% of respondents reported using A&E, with no substantial differences in  
15 absolute values related to gender, age, or diagnosis. 55% of respondents reported not having used  
16 'any resources due to coronavirus or concerns about its symptoms'. Reporting not having used  
17 resources was more common in older than younger adults (Kruskal-Wallis <0.001, Online Table E2).  
18 As might be expected, higher percentages of respondents in working age groups were concerned  
19 about their financial situation due to missed work.  
20  
21  
22  
23  
24  
25  
26  
27  
28  
29  
30  
31  
32  
33  
34  
35  
36  
37  
38  
39  
40  
41

42 Respondents made use of various sources for information on coronavirus, the most commonly  
43 reported being television (73%), news websites (50%), and (non-BLF/AUK) social media (25%). Less  
44 commonly reported sources of information on coronavirus include BLF/AUK websites (17%) and social  
45 media (14%), radio (12%) and friends and family (8%) (See Online Table E2 for further responses about  
46 practical preparedness for COVID-19).  
47  
48  
49  
50  
51  
52

53 Respondents were particularly interested in having more information about how to manage their lung  
54 condition in relation to coronavirus (65%), decisions they may need to make if they were to get ill with  
55 COVID-19 (49%), and how to look after their mental health (31%).  
56  
57  
58  
59  
60

## Practical difficulties

Multiple difficulties were experienced by respondents regarding health impacting practical issues. 22% reported difficulties accessing groceries, while 7% had difficulties accessing prescriptions (Online Table E2)

## DISCUSSION

COVID-19 is having significant impacts on individuals with respiratory disease, generating high levels of anxiety and concerns about potential impacts on respondents and their families, compounded by social isolation and loneliness. In addition, many aspects of care have been cancelled or deferred, including pulmonary rehabilitation and severe asthma appointments in secondary and tertiary, care, on a background of provision that was already failing to meet the needs of many people<sup>10 11</sup>, with impacts evident despite relatively recent introduction of distancing measures. Respondents were clearly making an effort to engage in physical activity despite the challenging nature of the situation.

Despite the requirement for physical distancing, social isolation and loneliness can still be avoided, or reduced, through targeted support and intervention. There is growing evidence that COVID-19 disproportionately effects more deprived groups<sup>22</sup>. Isolation strategies are also likely to impact most heavily on the most disadvantaged individuals with the least economic and social capital.

A key practical issue is that nearly half the respondents who smoke tobacco reported that they intended to quit due to COVID-19. It will be important to ensure that there is provision of appropriate accessible smoking cessation support services, to maximise their chance of success both to reduce the occurrence of smoking related disease generally<sup>23</sup> and to reduce individuals' risk from COVID-19 specifically<sup>24</sup>. In addition, encouraging uptake of online prescriptions and directing patients to online

resources including inhaler technique videos to support self-management, as recommended in the NICE COVID-19 COPD Rapid Guideline Update (NG168)<sup>25</sup>, should be prioritised.

The study sample includes representation from a wide age range, a variety of respiratory conditions, and all countries of the UK, but some limitations exist. More detail about disease severity would have been useful for interpreting responses, as this impacts government guidance regarding distancing and shielding measures. The study was online so results may not be representative for digitally excluded individuals. In addition, this study did not assess the views on the use of facemasks which has been found to be protective, to some extent, for mental health in China<sup>26</sup>. This would be of interest to explore further in the UK population. Finally, the cross-sectional nature of this study does not allow for longitudinal change of the level of psychiatric comorbidity, which in patients with respiratory disorders may have a higher baseline prevalence than the general population even prior to the COVID-19 pandemic<sup>27</sup>.

## CONCLUSION

Measures to reduce the risk of COVID-19 are having profound impacts on people with lung disease including widespread disruption to fundamental components of healthcare services, high levels of anxiety and loneliness. There is an urgent need to adapt services to address these needs and improve signposting of individuals to existing resources, in order to mitigate negative health consequences, and provide appropriate care to this vulnerable group.

## Acknowledgements

The authors would like to thank Sarah MacFadyen for her work developing the survey, and the respondents for completing the survey.



**Transparency statement**

Dr Keir Philip affirms that this manuscript is an honest, accurate, and transparent account of the study being reported; that no important aspects of the study have been omitted; and that any discrepancies from the study as planned (and, if relevant, registered) have been explained.

For peer review only

**Table 1: Participant Characteristics**

|                                                    | Asthma<br>n=7975 | Chronic respiratory disease<br>(non-asthma)<br>n=1541 |
|----------------------------------------------------|------------------|-------------------------------------------------------|
| Age group                                          |                  |                                                       |
| 17 and under                                       | 5.54 % (439)     | 0.33 % (5)                                            |
| 18 to 29                                           | 12.11 % (959)    | 0.59 % (9)                                            |
| 30 to 39                                           | 24.68 % (1,955)  | 1.90 % (29)                                           |
| 40 to 49                                           | 30.60 % (2,424)  | 8.93 % (136)                                          |
| 50 to 59                                           | 18.67 % (1,479)  | 21.47 % (327)                                         |
| 60 to 69                                           | 6.26 % (496)     | 37.82 % (576)                                         |
| 70 to 79                                           | 1.94 % (154)     | 25.21 % (384)                                         |
| 80 and above                                       | 0.19 % (15)      | 3.74 % (57)                                           |
| Gender (%Female)                                   | 82.92 % (6,562)  | 74.67 % (1,141)                                       |
| Country                                            |                  |                                                       |
| England                                            | 75.35 % (5,981)  | 83.33 % (1,275)                                       |
| Scotland                                           | 13.03 % (1,034)  | 9.54 % (146)                                          |
| Wales                                              | 7.19 % (571)     | 5.23 % (80)                                           |
| Northern Ireland                                   | 4.43 % (352)     | 1.90 % (29)                                           |
| Influenza immunisation<br>2019/20                  |                  |                                                       |
| Yes                                                | 77.10 % (6,139)  | 89.96 % (1,380)                                       |
| No                                                 | 22.54 % (1,795)  | 9.97 % (153)                                          |
| Don't know                                         | 0.35 % (28)      | 0.07 % (1)                                            |
| Current smoking                                    |                  |                                                       |
| Non-smoker                                         | 89.41 % (7,115)  | 86.07 % (1,322)                                       |
| Smoker                                             | 10.59 % (843)    | 13.93 % (214)                                         |
| Of smokers -                                       |                  |                                                       |
| Intending to quit smoking due<br>to COVID-19       | 49.11 % (414)    | 64.48 % (138)                                         |
| Not intending quit smoking<br>due to COVID-19      | 50.89 % (429)    | 35.51 % (76)                                          |
| Shielding                                          |                  |                                                       |
| Actively shielding                                 | 68.66 % (5,461)  | 89.97 % (1,381)                                       |
| Not actively shielding                             | 31.34 % (2,493)  | 10.30 % (154)                                         |
| Self-isolating                                     |                  |                                                       |
| Currently self-isolating                           | 67.81 % (5,403)  | 88.01 % (1,350)                                       |
| Not currently self-isolating                       | 32.19 % (2,565)  | 11.99 % (184)                                         |
| Current COVID-19 Symptoms<br>'Yes'                 | 6.89 % (549)     | 3.07 % (47)                                           |
| Current COVID-19 Symptoms<br>'Not sure'            | 3.99 % (318)     | 3.78 % (58)                                           |
| Following self-isolation advice<br>due to symptoms | 92.81 % (800)    | 98.04 % (100)                                         |
| Not following self-isolation<br>advice             | 7.19 % (62)      | 1.96 % (2)                                            |
| Diagnosis                                          |                  |                                                       |

|                |                 |
|----------------|-----------------|
| Asthma         | 83.81 % (7,975) |
| COPD           | 10.12 % (963)   |
| Bronchiectasis | 3.81 % (363)    |
| ILD            | 1.78 % (169)    |
| Other          | 0.48 % (46)     |
|                |                 |

**Table 2: Impact of COVID-19 related measures on chronic disease healthcare provision and self-management**

| Component of disease management                         | Percentage | Number of observations |
|---------------------------------------------------------|------------|------------------------|
| <b>Health service provision</b>                         |            |                        |
| GP appointment cancelled                                | 9.69 %     | 922                    |
| Hospital appointment cancelled                          | 7.83 %     | 745                    |
| GP phone/remote appointment                             | 30.93 %    | 2,944                  |
| Some form of cancellation or change in service delivery | 44.86 %    | 4,270                  |
|                                                         |            |                        |
| <b>Of those who do PR (n=553)</b>                       |            |                        |
| Doing PR at home                                        | 24.77 %    | 137                    |
| PR cancelled                                            | 24.23 %    | 134                    |
|                                                         |            |                        |
| Have enough medications                                 | 93.41 %    | 8,871                  |
| Have online prescriptions                               | 64.38 %    | 6,112                  |
| Have a written self-management plan for their condition | 39.56 %    | 3,756                  |
| Have watched online inhaler videos                      |            |                        |
| Yes                                                     | 44.11 %    | 4,190                  |
| No                                                      | 53.57 %    | 5,089                  |
| Don't use inhalers                                      | 2.33 %     | 221                    |
|                                                         |            |                        |
| <b>Physical activity</b>                                |            |                        |
| Able to 'keep active' or do exercise at home            | 81.02 %    | 7,682                  |
| Not able to 'keep active' or do exercise at home        | 18.92 %    | 1,800                  |
| Type of activity                                        |            |                        |
| Walks                                                   | 47.05 %    | 4,478                  |
| Cycling                                                 | 6.43 %     | 612                    |
| Run                                                     | 7.17 %     | 682                    |
| Yoga                                                    | 12.03 %    | 1,145                  |
| Gardening                                               | 29.06 %    | 2,817                  |
| Housework                                               | 54.16 %    | 5,155                  |

**Figure 1: legend A bar chart of median anxiety level by age group**

**REFERENCES**

1. Docherty AB, Harrison EM, Green CA, et al. Features of 20 133 UK patients in hospital with covid-19 using the ISARIC WHO Clinical Characterisation Protocol: prospective observational cohort study. *BMJ* 2020;369:m1985. doi: 10.1136/bmj.m1985
2. Williamson EJ, Walker AJ, Bhaskaran K, et al. OpenSAFELY: factors associated with COVID-19 death in 17 million patients. *Nature* 2020 doi: 10.1038/s41586-020-2521-4
3. Kmietowicz Z. Covid-19: Highest risk patients are asked to stay at home for 12 weeks. *Bmj* 2020;368:m1170. doi: 10.1136/bmj.m1170 [published Online First: 2020/03/25]
4. Public Health England. Guidance on shielding and protecting people defined on medical grounds as extremely vulnerable from COVID-19 2020 [updated 30/03/2020. Available from: <https://www.gov.uk/government/publications/guidance-on-shielding-and-protecting-extremely-vulnerable-persons-from-covid-19/guidance-on-shielding-and-protecting-extremely-vulnerable-persons-from-covid-19> accessed 09/04/2020 2020.
5. Steptoe A, Shankar A, Demakakos P, et al. Social isolation, loneliness, and all-cause mortality in older men and women. *Proceedings of the National Academy of Sciences of the United States of America* 2013;110(15):5797-801. doi: 10.1073/pnas.1219686110
6. Bu F, Philip K, Fancourt D. Social isolation and loneliness as risk factors for hospital admissions for respiratory disease among older adults. *Thorax* 2020 doi: 10.1136/thoraxjnl-2019-214445 [published Online First: 2020/04/23]
7. Wang C, Pan R, Wan X, et al. Immediate Psychological Responses and Associated Factors during the Initial Stage of the 2019 Coronavirus Disease (COVID-19) Epidemic among the General Population in China. *Int J Environ Res Public Health* 2020;17(5) doi: 10.3390/ijerph17051729 [published Online First: 2020/03/12]

- 1  
2  
3 8. Iob E, Steptoe A, Fancourt D. Abuse, self-harm and suicidal ideation in the UK during the COVID-19  
4  
5 pandemic. *The British journal of psychiatry : the journal of mental science* 2020;1-4. doi:  
6  
7 10.1192/bjp.2020.130 [published Online First: 2020/07/14]  
8  
9
- 10 9. Douglas M, Katikireddi SV, Taulbut M, et al. Mitigating the wider health effects of covid-19  
11  
12 pandemic response. *BMJ* 2020;369:m1557. doi: 10.1136/bmj.m1557  
13
- 14 10. Elbehairy AF, Quint JK, Rogers J, et al. Patterns of breathlessness and associated consulting  
15  
16 behaviour: results of an online survey. *Thorax* 2019;74(8):814-17. doi: 10.1136/thoraxjnl-  
17  
18 2018-212950  
19
- 20 21 11. Philip K, Gaduzo S, Rogers J, et al. Patient experience of COPD care: outcomes from the British  
22  
23 Lung Foundation Patient Passport. *BMJ Open Respiratory Research* 2019;6(1):e000478. doi:  
24  
25 10.1136/bmjresp-2019-000478  
26
- 27 28 12. Kelly JL, Elkin SL, Fluxman J, et al. Breathlessness and skeletal muscle weakness in patients  
29  
30 undergoing lung health screening in primary care. *Copd* 2013;10(1):40-54. doi:  
31  
32 10.3109/15412555.2012.727923 [published Online First: 2013/01/01]  
33
- 34 35 13. Nacul L, Soljak M, Samarasundera E, et al. COPD in England: a comparison of expected, model-  
36  
37 based prevalence and observed prevalence from general practice data. *J Public Health (Oxf)*  
38  
39 2011;33(1):108-16. doi: 10.1093/pubmed/fdq031 [published Online First: 2010/06/05]  
40
- 41 42 14. Steiner MC, Lowe D, Beckford K, et al. Socioeconomic deprivation and the outcome of pulmonary  
43  
44 rehabilitation in England and Wales. *Thorax* 2017;72(6):530-37. doi: 10.1136/thoraxjnl-2016-  
45  
46 209376  
47
- 48 49 15. Zoumot Z, Jordan S, Hopkinson NS. Emphysema: time to say farewell to therapeutic nihilism.  
50  
51 *Thorax* 2014;69(11):973-5. doi: 10.1136/thoraxjnl-2014-205667 [published Online First:  
52  
53 2014/07/06]  
54
- 55 56 16. Tan W, Hao F, McIntyre RS, et al. Is returning to work during the COVID-19 pandemic stressful? A  
57  
58 study on immediate mental health status and psychoneuroimmunity prevention measures  
59  
60

- 1  
2  
3 of Chinese workforce. *Brain Behav Immun* 2020;87:84-92. doi: 10.1016/j.bbi.2020.04.055  
4  
5 [published Online First: 2020/04/27]  
6  
7  
8 17. Tran BX, Ha GH, Nguyen LH, et al. Studies of Novel Coronavirus Disease 19 (COVID-19) Pandemic:  
9  
10 A Global Analysis of Literature. *Int J Environ Res Public Health* 2020;17(11) doi:  
11  
12 10.3390/ijerph17114095 [published Online First: 2020/06/12]  
13  
14 18. Hopkinson NS, Molyneux A, Pink J, et al. Chronic obstructive pulmonary disease: diagnosis and  
15  
16 management: summary of updated NICE guidance. *BMJ* 2019;366:l4486. doi:  
17  
18 10.1136/bmj.l4486  
19  
20 19. White J, Paton JY, Niven R, et al. Guidelines for the diagnosis and management of asthma: a look  
21  
22 at the key differences between BTS/SIGN and NICE. *Thorax* 2018;73(3):293-97. doi:  
23  
24 10.1136/thoraxjnl-2017-211189  
25  
26 20. Hughes ME, Waite LJ, Hawkey LC, et al. A Short Scale for Measuring Loneliness in Large Surveys:  
27  
28 Results From Two Population-Based Studies. *Research on aging* 2004;26(6):655-72. doi:  
29  
30 10.1177/0164027504268574  
31  
32  
33 21. Zwerink M, Kerstjens HA, Palen J, et al. (Cost-)effectiveness of self-treatment of exacerbations in  
34  
35 patients with COPD: 2 years follow-up of a RCT. *Respirology* 2016;21(3):497-503. doi:  
36  
37 doi:10.1111/resp.12697  
38  
39  
40 22. Rose TC, Mason K, Pennington A, et al. Inequalities in COVID19 mortality related to ethnicity and  
41  
42 socioeconomic deprivation. *medRxiv* 2020:2020.04.25.20079491. doi:  
43  
44 10.1101/2020.04.25.20079491  
45  
46  
47 23. Royal College of Physicians. Hiding in plain sight: Treating tobacco dependency in the NHS  
48  
49 [https://www.rcplondon.ac.uk/projects/outputs/hiding-plain-sight-treating-tobacco-](https://www.rcplondon.ac.uk/projects/outputs/hiding-plain-sight-treating-tobacco-dependency-nhs)  
50  
51 [dependency-nhs](https://www.rcplondon.ac.uk/projects/outputs/hiding-plain-sight-treating-tobacco-dependency-nhs), 2018.  
52  
53  
54 24. Hopkinson NS, Rossi N, El-Sayed Moustafa J, et al. Current tobacco smoking and risk from COVID-  
55  
56 19: results from a population symptom app in over 2.4 million people. *medRxiv*  
57  
58 2020:2020.05.18.20105288. doi: 10.1101/2020.05.18.20105288  
59  
60

- 1  
2  
3 25. National Institute for Clinical Excellence. COVID-19 rapid guideline: community-based care of  
4  
5 patients with chronic obstructive pulmonary disease (COPD). *Available from:*  
6  
7 <https://www.nice.org.uk/guidance/ng168> 2020  
8  
9
- 10 26. Wang C, Pan R, Wan X, et al. A longitudinal study on the mental health of general population  
11  
12 during the COVID-19 epidemic in China. *Brain Behav Immun* 2020;87:40-48. doi:  
13  
14 10.1016/j.bbi.2020.04.028 [published Online First: 2020/04/17]  
15  
16
- 17 27. Zhang MW, Ho RC, Cheung MW, et al. Prevalence of depressive symptoms in patients with  
18  
19 chronic obstructive pulmonary disease: a systematic review, meta-analysis and meta-  
20  
21 regression. *Gen Hosp Psychiatry* 2011;33(3):217-23. doi:  
22  
23 10.1016/j.genhosppsy.2011.03.009 [published Online First: 2011/05/24]  
24  
25  
26  
27  
28  
29  
30  
31  
32  
33  
34  
35  
36  
37  
38  
39  
40  
41  
42  
43  
44  
45  
46  
47  
48  
49  
50  
51  
52  
53  
54  
55  
56  
57  
58  
59  
60

1  
2  
3  
4  
5  
6  
7  
8  
9  
10  
11  
12  
13  
14  
15  
16  
17  
18  
19  
20  
21  
22  
23  
24  
25  
26  
27  
28  
29  
30  
31  
32  
33  
34  
35  
36  
37  
38  
39  
40  
41  
42  
43  
44  
45  
46  
47  
48  
49  
50  
51  
52  
53  
54  
55  
56  
57  
58  
59  
60

Figure 1: A bar chart of median anxiety level by age group



We conducted the Kruskal-Wallis H test to determine if there is a statistically significant difference between anxiety levels in different age groups. This test was selected due to the marked left shift in the data. Sample sizes in each group are reported in table 2. This test demonstrated statistically significant differences between groups (chi-squared = 158.895 with 7 d.f., probability = 0.0001).



1  
2  
3 **Respiratory patient experience of measures to reduce risk of COVID-19: findings from a descriptive**  
4 **cross-sectional UK wide survey**  
5  
6

7  
8 **– ONLINE SUPPLEMENT**  
9

10  
11 Authors: Keir EJ Philip<sup>1</sup>, Andrew Cumella<sup>2</sup>, Joe Farrington-Douglas<sup>2</sup>, Michael Laffan<sup>2</sup>, Nicholas S  
12  
13 Hopkinson<sup>1,2</sup>,  
14

15  
16 <sup>1</sup>National Heart and Lung Institute, Imperial College London  
17

18 <sup>2</sup>Asthma UK and British Lung Foundation Partnership  
19

20  
21 Corresponding Author: Dr Keir Philip  
22

23  
24 National Heart and Lung Institute  
25

26 Imperial College London  
27

28 Royal Brompton Hospital Campus  
29

30 Fulham Rd  
31

32 London SW3 6NP  
33

34 [k.philip@imperial.ac.uk](mailto:k.philip@imperial.ac.uk)  
35  
36  
37  
38  
39  
40  
41  
42  
43  
44  
45  
46  
47  
48  
49  
50  
51  
52  
53  
54  
55  
56  
57  
58  
59  
60

## SURVEY QUESTIONS AND POSSIBLE RESPONSES:

What is your age? 17 and under; 18-29; 30-39; 40-49; 50-59; 60-69; 70-79; 80+ What is your gender? Male; Female; Other

What nation do you live in? England; Northern Ireland; Scotland; Wales

Have you ever been told that you have 'difficult', 'brittle' or 'severe' asthma? (AUK survey only) Yes; No; Not sure

What is your main lung diagnosis? Asthma; COPD (chronic obstructive pulmonary disease); Bronchiectasis; ILD (interstitial lung disease); I do not have a lung condition; Other

Do you receive pulmonary rehabilitation as part of your care? Yes; No.

When do you get out of breath? (MRC dyspnoea scale options) (BLF survey only)

- I'm not troubled by being out of breath, except on strenuous exercise
- I'm short of breath when hurrying on the level or walking up a slight hill
- I walk slower than most people on the level, stop after a mile or so, or stop after 15 minutes of walking at my own pace
- I stop for breath after walking about 100 yards or after a few minutes on level ground
- I'm too breathless to leave the house, or breathless when dressing and undressing

Are you currently following the government's 'shielding' advice? Yes; No.

Have you received a letter or text message advising you to shield? Yes; No; Don't know.

Did you have the flu jab this winter? Yes; No; Don't know.

Have you seen guidance or advice on coronavirus from Asthma UK or the British Lung Foundation? Yes; No.

How did you see this advice? Via email; On Twitter; On Facebook; On the AUK and/or BLF websites.

Where do you mainly get your information about coronavirus? TV; Radio; News websites; AUK / BLF websites; AUK /BLF social media; Other social media; Friends and family.

What was it about the advice you saw that wasn't helpful? It was too complicated; There was not enough detail; I didn't trust it; It was badly presented; It couldn't answer my query.

The Government? Very helpful; Helpful; Neither helpful nor unhelpful; Not helpful; Not helpful at all; I have not seen their advice.

What was it about the advice you saw that wasn't helpful? It was too complicated; There was not enough detail; I didn't trust it; It was badly presented; It couldn't answer my query

Would you like more information on any of the following during the coronavirus outbreak? Yes, No.

Are you currently suffering from any coronavirus symptoms? Yes; No; Not sure.

Are you following isolation advice? Yes; No.

1  
2  
3 How confident are you about following advice to self-isolate or shield? Very confident; Somewhat  
4 confident; Neither confident nor not confident; Not very confident; Not confident at all.  
5

6 How confident are you that you will be able to access food and other provisions if you have to self-  
7 isolate or shield? Very confident; Somewhat confident; Neither confident nor not confident; Not  
8 very confident; Not confident at all.  
9

10 Do you have enough medicines for your needs at the moment? Yes; No.

11 Are you registered to order prescriptions online from your GP? Yes; No.

12 Have you had a look at online inhaler technique videos to check that you are using your inhalers  
13 properly? Yes; No; I don't use inhalers.

14 Do you have a written self-management plan for your condition? Yes; No.

15 In general, how well prepared do you feel for coronavirus? 1-10, with 10 being most prepared

16 In general, how anxious do you feel about coronavirus? 1-10, with 10 being most anxious

17 Which of the following apply to you?

- 18  
19  
20  
21  
22  
23  
24  
25 - I'm concerned about my lung condition  
26 - I'm concerned about the health of my family members  
27 - I'm coping well  
28 - I'm having trouble getting groceries  
29 - I'm worried about my financial situation due to missed work  
30 - I can't get the prescriptions I need  
31 - None of the above  
32 - Other  
33  
34

35 Have you used any of these services due to coronavirus, or concerns about its symptoms?

- 36  
37 - NHS 111 (online checker)  
38 - NHS 111 (telephone advice)  
39 - GP  
40 - Pharmacy  
41 - A&E  
42 - BLF or AUK nurse phone  
43 - Other  
44  
45

46 Has any of the following happened to you because of the way the NHS is working at the moment?

- 47  
48 - I have had to have a GP appointment conducted over the phone / remotely  
49 - My regular care for my lung condition at the hospital has been cancelled  
50 - My regular care for my lung condition at the GP has been cancelled  
51 - Pulmonary rehabilitation classes were cancelled  
52 - I have had to do pulmonary rehabilitation exercises at home  
53 - None of the above  
54 - Other  
55  
56

57 Are you able to perform your job at home? Yes; No; I'm not in work.  
58  
59  
60

1  
2  
3 How supportive have your workplace been during the coronavirus outbreak? Very supportive;  
4 Supportive; Somewhat supportive; Not supportive; Not supportive at all.  
5

6 Are you keeping physically active, or are able to do any exercise at home? Yes; No.  
7

8 Which of the following are you doing to stay active while at home?  
9

- 10 - Housework
- 11 - Gardening
- 12 - Going on walks
- 13 - Yoga
- 14 - Cycling
- 15 - Running
- 16 - Other
- 17
- 18

19 If you smoke, are you planning to try to quit smoking to protect yourself from coronavirus? Yes; No; I  
20 don't smoke.  
21

22 Are you actively self-isolating due to coronavirus? Yes; No.  
23

24 Do you live alone? Yes; No.  
25

26 How often do you feel you lack companionship? Hardly ever; Some of the time; Often.  
27

28 How often do you feel left out of things? Hardly ever; Some of the time; Often.  
29

30 How often do you feel isolated from others? Hardly ever; Some of the time; Often.  
31  
32  
33  
34  
35  
36  
37  
38  
39  
40  
41  
42  
43  
44  
45  
46  
47  
48  
49  
50  
51  
52  
53  
54  
55  
56  
57  
58  
59  
60

Table E1: Loneliness, Isolation, Anxiety, and Concerns

|                                                   | Percentage       | Number of observations |
|---------------------------------------------------|------------------|------------------------|
| <b>Domestic Isolation</b>                         |                  |                        |
| Live alone                                        | 13.06 %          | 1,241                  |
| Does not live alone                               | 86.94 %          | 8,260                  |
| <b>Loneliness</b>                                 |                  |                        |
| Feels lacks companionship                         |                  |                        |
| Hardly ever                                       | 48.91 %          | 4,643                  |
| Some of the time                                  | 39.84 %          | 3,782                  |
| Often                                             | 11.25 %          | 1,068                  |
| Feels left out of things                          |                  |                        |
| Hardly ever                                       | 46.73 %          | 4,434                  |
| Some of the time                                  | 40.84 %          | 3,875                  |
| Often                                             | 12.43 %          | 1,179                  |
| Feels isolated from others                        |                  |                        |
| Hardly ever                                       | 34.34 %          | 3,261                  |
| Some of the time                                  | 47.21 %          | 4,483                  |
| Often                                             | 18.45 %          | 1,752                  |
|                                                   | <b>Mean (SD)</b> | <b>N</b>               |
| <b>Overall loneliness score (all respondents)</b> |                  |                        |
|                                                   | 5.12 (1.80)      | 9,458                  |
| Loneliness by gender                              |                  |                        |
| Male                                              | 4.74 (1.72)      | 1,728                  |
| Female                                            | 5.21 (1.81)      | 7,652                  |
| Loneliness by age                                 |                  |                        |
| 17 and under                                      | 4.81 (1.68)      | 441                    |
| 18 to 29                                          | 5.65 (1.84)      | 962                    |
| 30 to 39                                          | 5.20 (1.82)      | 1,978                  |
| 40 to 49                                          | 4.96(1.78)       | 2,550                  |
| 50 to 59                                          | 5.00 (1.75)      | 1,794                  |
| 60 to 69                                          | 5.24 (1.83)      | 1,064                  |
| 70 to 79                                          | 5.03 (1.74)      | 532                    |
| 80 and above                                      | 5.26 (1.79)      | 69                     |
| Loneliness by main diagnosis                      |                  |                        |
| Asthma                                            | 5.06 (1.79)      | 7,936                  |
| COPD                                              | 5.56 (1.85)      | 957                    |
| Bronchiectasis                                    | 5.18(1.71)       | 357                    |
| ILD                                               | 5.54 (1.92)      | 163                    |
| Other                                             | 5.40 (1.84)      | 45                     |
| Loneliness by shielding                           |                  |                        |
| Actively shielding                                | 5.23 (1.81)      | 6,804                  |
| Not actively shielding                            | 4.85 (1.74)      | 2,654                  |
| <b>Anxiety</b>                                    |                  |                        |
| How anxious do you feel? (1-10)                   | 8.03 (2.07)      | 9,495                  |
| Anxiety by gender                                 |                  |                        |

|                             |                                |             |       |
|-----------------------------|--------------------------------|-------------|-------|
|                             | Male                           | 7.55 (2.28) | 1,728 |
|                             | Female                         | 8.13 (1.99) | 7,691 |
| <b>Anxiety by age</b>       |                                |             |       |
|                             | 17 and under                   | 8.14 (2.11) | 442   |
|                             | 18 to 29                       | 8.23 (1.90) | 967   |
|                             | 30 to 39                       | 8.24 (1.97) | 1,981 |
|                             | 40 to 49                       | 8.14 (1.96) | 2,558 |
|                             | 50 to 59                       | 8.00 (2.11) | 1,803 |
|                             | 60 to 69                       | 7.60 (2.27) | 1,066 |
|                             | 70 to 79                       | 7.32 (2.18) | 536   |
|                             | 80 and above                   | 7.03 (2.33) | 72    |
| <b>Anxiety by diagnosis</b> |                                |             |       |
|                             | Asthma                         | 8.11 (2.01) | 7,959 |
|                             | COPD                           | 7.57 (2.31) | 960   |
|                             | Bronchiectasis                 | 7.64 (2.14) | 362   |
|                             | ILD                            | 7.51 (2.24) | 168   |
|                             | Other                          | 7.76 (2.23) | 46    |
|                             | Actively shielding             | 8.06 (2.08) | 6,829 |
|                             | Not actively shielding         | 7.94 (2.03) | 2,666 |
| <b>Feels coping well</b>    |                                | 25.90 %     | 2,465 |
| <b>By Gender</b>            |                                |             |       |
|                             | Male                           | 34.39 %     | 596   |
|                             | Female                         | 23.96 %     | 1,844 |
| <b>By Age</b>               |                                |             |       |
|                             | 17 and under                   | 22.97 %     | 102   |
|                             | 18 to 29                       | 17.46 %     | 169   |
|                             | 30 to 39                       | 19.20 %     | 381   |
|                             | 40 to 49                       | 24.38 %     | 624   |
|                             | 50 to 59                       | 26.74 %     | 483   |
|                             | 60 to 69                       | 37.50 %     | 402   |
|                             | 70 to 79                       | 47.21 %     | 254   |
|                             | 80 and above                   | 45.83 %     | 33    |
| <b>By diagnosis</b>         |                                |             |       |
|                             | Asthma                         | 24.33 %     | 1,940 |
|                             | COPD                           | 34.79 %     | 335   |
|                             | Bronchiectasis                 | 31.96 %     | 116   |
|                             | ILD                            | 34.91 %     | 59    |
|                             | Other                          | 32.61 %     | 15    |
|                             | Bronchiectasis                 | 8.26 %      | 30    |
|                             | ILD                            | 12.43 %     | 21    |
|                             | Other                          | 13 %        | 6     |
| <b>Concerns</b>             |                                |             |       |
|                             | Concerned about lung condition | 64.25 %     | 6,115 |

|                                                        |         |       |
|--------------------------------------------------------|---------|-------|
| By Gender                                              |         |       |
| Male                                                   | 57.24 % | 992   |
| Female                                                 | 65.88 % | 5075  |
| By Age                                                 |         |       |
| 17 and under                                           | 41.22 % | 183   |
| 18 to 29                                               | 73.14 % | 708   |
| 30 to 39                                               | 71.47 % | 1,418 |
| 40 to 49                                               | 68.71 % | 1,759 |
| 50 to 59                                               | 62.24 % | 1,124 |
| 60 to 69                                               | 54.76 % | 587   |
| 70 to 79                                               | 48.14 % | 259   |
| 80 and above                                           | 50.00 % | 36    |
| By diagnosis                                           |         |       |
| Asthma                                                 | 64.94 % | 5,179 |
| COPD                                                   | 56.80 % | 547   |
| Bronchiectasis                                         | 67.77 % | 246   |
| ILD                                                    | 66.86 % | 113   |
| Other                                                  | 65.22 % | 30    |
| Concerned about family                                 | 61.50 % | 5,854 |
| By Gender                                              |         |       |
| Male                                                   | 54.99 % | 953   |
| Female                                                 | 63.03 % | 4,855 |
| By Age                                                 |         |       |
| 17 and under                                           | 60.36 % | 268   |
| 18 to 29                                               | 65.91 % | 638   |
| 30 to 39                                               | 66.33 % | 1,316 |
| 40 to 49                                               | 64.02 % | 1,639 |
| 50 to 59                                               | 60.24 % | 1,088 |
| 60 to 69                                               | 53.82 % | 1,072 |
| 70 to 79                                               | 47.21 % | 538   |
| 80 and above                                           | 38.89 % | 72    |
| By diagnosis                                           |         |       |
| Asthma                                                 | 63.32 % | 5,050 |
| COPD                                                   | 51.40 % | 495   |
| Bronchiectasis                                         | 53.72 % | 195   |
| ILD                                                    | 49.11 % | 83    |
| Other                                                  | 67.39 % | 31    |
| Concerned about financial situation due to missed work | 18.61 % | 1,771 |
| By Gender                                              |         |       |
| Male                                                   | 18.58 % | 322   |
| Female                                                 | 18.64 % | 1,436 |
| By Age                                                 |         |       |

|                |         |       |
|----------------|---------|-------|
| 17 and under   | 13.51 % | 60    |
| 18 to 29       | 26.96 % | 261   |
| 30 to 39       | 22.73 % | 451   |
| 40 to 49       | 22.50 % | 576   |
| 50 to 59       | 18.72 % | 338   |
| 60 to 69       | 6.62 %  | 71    |
| 70 to 79       | 0.74 %  | 4     |
| 80 and above   | 1.39 %  | 1     |
|                |         |       |
| By diagnosis   |         |       |
| Asthma         | 20.43 % | 1,629 |
| COPD           | 8.83 %  | 85    |
| Bronchiectasis | 8.26 %  | 30    |
| ILD            | 12.43 % | 21    |
| Other          | 13 %    | 6     |



Table E2: Practical Preparedness

|                                                                 | Percentage  | Number of observations |
|-----------------------------------------------------------------|-------------|------------------------|
| <b>Sources of Information</b>                                   |             |                        |
| Government Letter                                               |             |                        |
| Has received                                                    | 19.54 %     | 1,855                  |
| Has not received                                                | 78.98 %     | 7,498                  |
| Does not know                                                   | 1.49 %      | 141                    |
| Actively shielding of those who have received government letter | 97.83 %     | 1,804                  |
| Main sources of COVID info                                      |             |                        |
| TV                                                              | 72.98 %     | 6,946                  |
| Radio                                                           | 11.56 %     | 1,100                  |
| New websites                                                    | 50.34 %     | 4,791                  |
| AUK/BLF website                                                 | 17.49 %     | 1,665                  |
| AUK/BLF social media                                            | 14.36 %     | 1,367                  |
| Other social media                                              | 24.85 %     | 2,365                  |
| Friends and Family                                              | 8.34 %      | 794                    |
| Would like more information on:                                 |             |                        |
| Symptoms                                                        | 35.26 %     | 3,356                  |
| How to help their community                                     | 6.60 %      | 628                    |
| Financial help                                                  | 14.57 %     | 1,387                  |
| Decisions possibly required if a person I care for gets ill     | 28.20 %     | 2,684                  |
| Decisions possibly required if I get ill                        | 48.95 %     | 4,659                  |
| How to manage my lung condition during coronavirus              | 65.26 %     | 6,211                  |
| How to look after my mental health                              | 31.14 %     | 2,964                  |
| How to manage being at home for so long                         | 26.79 %     | 2,550                  |
| I do not need more information on coronavirus                   | 13.05 %     | 1,242                  |
| <b>Confidence</b>                                               |             |                        |
| How well prepared do you feel? (1-10)                           | Mean (SD)   | Observations           |
|                                                                 | 6.41 (1.7)  | 9,490                  |
| By Gender                                                       |             |                        |
| Male                                                            | 6.63 (1.75) | 1,729                  |
| Female                                                          | 6.36 (1.80) | 1,683                  |
| By Age                                                          |             |                        |
| 17 and under                                                    | 6.41 (1.70) | 444                    |
| 18 to 29                                                        | 5.94 (1.71) | 967                    |
| 30 to 39                                                        | 6.07 (1.74) | 1,982                  |
| 40 to 49                                                        | 6.36 (1.75) | 2,555                  |
| 50 to 59                                                        | 6.60 (1.78) | 1,803                  |
| 60 to 69                                                        | 6.89 (1.85) | 1,067                  |
| 70 to 79                                                        | 7.12 (1.76) | 533                    |
| 80 and above                                                    | 6.92 (1.90) | 70                     |
| By diagnosis                                                    |             |                        |

|  |                                                      |             |       |
|--|------------------------------------------------------|-------------|-------|
|  | Asthma                                               | 6.36 (1.76) | 7,958 |
|  | COPD                                                 | 6.68 (2.00) | 657   |
|  | Bronchiectasis                                       | 6.63 (1.88) | 361   |
|  | ILD                                                  | 6.79 (1.89) | 168   |
|  | Other                                                | 6.50 (1.80) | 46    |
|  |                                                      |             |       |
|  | <b>Confidence following government advice (1-10)</b> | 4.17 (0.85) | 9,480 |
|  | <b>By Gender</b>                                     |             |       |
|  | Male                                                 | 4.15 (0.86) | 1,727 |
|  | Female                                               | 4.17(0.86)  | 7,675 |
|  |                                                      |             |       |
|  | <b>By Age</b>                                        |             |       |
|  | 17 and under                                         | 4.27 (0.75) | 440   |
|  | 18 to 29                                             | 4.06 (0.84) | 965   |
|  | 30 to 39                                             | 4.05 (0.92) | 1,975 |
|  | 40 to 49                                             | 4.12 (0.87) | 2,552 |
|  | 50 to 59                                             | 4.19 (0.85) | 1,802 |
|  | 60 to 69                                             | 4.36 (0.79) | 1,068 |
|  | 70 to 79                                             | 4.47 (0.67) | 537   |
|  | 80 and above                                         | 4.30 (0.80) | 71    |
|  |                                                      |             |       |
|  | <b>By diagnosis</b>                                  |             |       |
|  | Asthma                                               | 4.14 (0.87) | 7,944 |
|  | COPD                                                 | 4.34 (0.81) | 959   |
|  | Bronchiectasis                                       | 4.31 (0.78) | 362   |
|  | ILD                                                  | 4.42 (0.72) | 169   |
|  | Other                                                | 4.26 (0.80) | 46    |
|  |                                                      |             |       |
|  | <b>Problems accessing groceries</b>                  | 21.95 %     | 2,089 |
|  | <b>By Gender</b>                                     |             |       |
|  | Male                                                 | 18.29 %     | 317   |
|  | Female                                               | 22.74 %     | 1,752 |
|  |                                                      |             |       |
|  | <b>By Age</b>                                        |             |       |
|  | 17 and under                                         | 18.47 %     | 82    |
|  | 18 to 29                                             | 23.35 %     | 226   |
|  | 30 to 39                                             | 24.80 %     | 492   |
|  | 40 to 49                                             | 22.30 %     | 571   |
|  | 50 to 59                                             | 19.16 %     | 346   |
|  | 60 to 69                                             | 22.39 %     | 240   |
|  | 70 to 79                                             | 18.22 %     | 98    |
|  | 80 and above                                         | 19.44 %     | 14    |
|  |                                                      |             |       |
|  | <b>By diagnosis</b>                                  |             |       |
|  | Asthma                                               | 21.23 %     | 1,693 |
|  | COPD                                                 | 22.53 %     | 217   |
|  | Bronchiectasis                                       | 30.58 %     | 111   |
|  | ILD                                                  | 31.36 %     | 53    |
|  | Other                                                | 32.61 %     | 15    |
|  |                                                      |             |       |

|                                                                                                |                |         |       |
|------------------------------------------------------------------------------------------------|----------------|---------|-------|
| <b>Problems accessing prescriptions</b>                                                        |                | 7.28 %  | 693   |
| By Gender                                                                                      |                |         |       |
|                                                                                                | Male           | 6.52 %  | 113   |
|                                                                                                | Female         | 7.46 %  | 575   |
| By Age                                                                                         |                |         |       |
|                                                                                                | 17 and under   | 8.33 %  | 37    |
|                                                                                                | 18 to 29       | 10.23 % | 99    |
|                                                                                                | 30 to 39       | 8.62 %  | 171   |
|                                                                                                | 40 to 49       | 7.93 %  | 203   |
|                                                                                                | 50 to 59       | 5.43 %  | 98    |
|                                                                                                | 60 to 69       | 4.76 %  | 51    |
|                                                                                                | 70 to 79       | 5.39 %  | 29    |
|                                                                                                | 80 and above   | 2.78 %  | 2     |
| By diagnosis                                                                                   |                |         |       |
|                                                                                                | Asthma         | 7.72 %  | 616   |
|                                                                                                | COPD           | 4.78 %  | 46    |
|                                                                                                | Bronchiectasis | 6.06 %  | 22    |
|                                                                                                | ILD            | 2.96 %  | 5     |
|                                                                                                | Other          | 8.70 %  | 4     |
| <b>Have you used any of these services due to coronavirus, or concerns about its symptoms?</b> |                |         |       |
| <b>Used 111 Online</b>                                                                         |                | 19.23 % | 1,830 |
| By Gender                                                                                      |                |         |       |
|                                                                                                | Male           | 17.57 % | 304   |
|                                                                                                | Female         | 19.64 % | 1,513 |
| By Age                                                                                         |                |         |       |
|                                                                                                | 17 and under   | 24.32 % | 444   |
|                                                                                                | 18 to 29       | 23.35 % | 968   |
|                                                                                                | 30 to 39       | 26.41 % | 1,984 |
|                                                                                                | 40 to 49       | 21.80 % | 558   |
|                                                                                                | 50 to 59       | 16.06 % | 290   |
|                                                                                                | 60 to 69       | 8.68 %  | 93    |
|                                                                                                | 70 to 79       | 2.79 %  | 15    |
|                                                                                                | 80 and above   | 2.78 %  | 2     |
| By diagnosis                                                                                   |                |         |       |
|                                                                                                | Asthma         | 21.45 % | 1,711 |
|                                                                                                | COPD           | 6.65 %  | 64    |
|                                                                                                | Bronchiectasis | 10.19 % | 37    |
|                                                                                                | ILD            | 7.10 %  | 12    |
|                                                                                                | Other          | 13.04 % | 6     |
| <b>Used 111 Phone</b>                                                                          |                | 8.01 %  | 762   |
| By Gender                                                                                      |                |         |       |
|                                                                                                | Male           | 8.02 %  | 139   |

|                     |                |         |       |
|---------------------|----------------|---------|-------|
|                     | Female         | 8.00 %  | 616   |
| <b>By Age</b>       |                |         |       |
|                     | 17 and under   | 9.68 %  | 43    |
|                     | 18 to 29       | 10.12 % | 98    |
|                     | 30 to 39       | 11.19 % | 222   |
|                     | 40 to 49       | 8.67 %  | 222   |
|                     | 50 to 59       | 6.76 %  | 122   |
|                     | 60 to 69       | 3.26 %  | 35    |
|                     | 70 to 79       | 2.79 %  | 15    |
|                     | 80 and above   | 0.00 %  | 0     |
| <b>By diagnosis</b> |                |         |       |
|                     | Asthma         | 8.80 %  | 702   |
|                     | COPD           | 3.53 %  | 34    |
|                     | Bronchiectasis | 3.86 %  | 14    |
|                     | ILD            | 5.33 %  | 9     |
|                     | Other          | 6.52 %  | 3     |
| <b>Used A&amp;E</b> |                |         |       |
|                     |                | 1.11 %  | 106   |
| <b>By Gender</b>    |                |         |       |
|                     | Male           | 1.15 %  | 20    |
|                     | Female         | 1.10 %  | 85    |
| <b>By Age</b>       |                |         |       |
|                     | 17 and under   | 0.90 %  | 4     |
|                     | 18 to 29       | 1.14 %  | 11    |
|                     | 30 to 39       | 1.14 %  | 35    |
|                     | 40 to 49       | 1.45 %  | 37    |
|                     | 50 to 59       | 0.78 %  | 14    |
|                     | 60 to 69       | 0.28 %  | 3     |
|                     | 70 to 79       | 0.00 %  | 0     |
|                     | 80 and above   | 1.39 %  | 1     |
| <b>By diagnosis</b> |                |         |       |
|                     | Asthma         | 1.24 %  | 99    |
|                     | COPD           | 0.42 %  | 4     |
|                     | Bronchiectasis | 0.55 %  | 2     |
|                     | ILD            | 0.59 %  | 1     |
|                     | Other          | 0.00 %  | 0     |
| <b>Used GP</b>      |                |         |       |
|                     |                | 25.63 % | 2,439 |
| <b>By Gender</b>    |                |         |       |
|                     | Male           | 23.43 % | 406   |
|                     | Female         | 26.20 % | 7,703 |
| <b>By Age</b>       |                |         |       |
|                     | 17 and under   | 26.58 % | 118   |
|                     | 18 to 29       | 29.65 % | 287   |
|                     | 30 to 39       | 29.74 % | 590   |

|  |                                    |         |       |
|--|------------------------------------|---------|-------|
|  | 40 to 49                           | 28.83 % | 738   |
|  | 50 to 59                           | 24.97 % | 451   |
|  | 60 to 69                           | 16.60 % | 178   |
|  | 70 to 79                           | 10.97 % | 59    |
|  | 80 and above                       | 6.94 %  | 5     |
|  |                                    |         |       |
|  | <b>By diagnosis</b>                |         |       |
|  | Asthma                             | 27.18 % | 2,168 |
|  | COPD                               | 14.75 % | 142   |
|  | Bronchiectasis                     | 22.31 % | 81    |
|  | ILD                                | 22.49 % | 38    |
|  | Other                              | 21.74 % | 10    |
|  |                                    |         |       |
|  | <b>Used the pharmacy</b>           | 8.95 %  | 852   |
|  | <b>By Gender</b>                   |         |       |
|  | Male                               | 10.91 % | 189   |
|  | Female                             | 8.54 %  | 658   |
|  |                                    |         |       |
|  | <b>By Age</b>                      |         |       |
|  | 17 and under                       | 11.71 % | 52    |
|  | 18 to 29                           | 10.64 % | 103   |
|  | 30 to 39                           | 8.87 %  | 174   |
|  | 40 to 49                           | 9.49 %  | 243   |
|  | 50 to 59                           | 8.42 %  | 152   |
|  | 60 to 69                           | 7.46 %  | 80    |
|  | 70 to 79                           | 7.06 %  | 38    |
|  | 80 and above                       | 6.94 %  | 5     |
|  |                                    |         |       |
|  | <b>By diagnosis</b>                |         |       |
|  | Asthma                             | 9.19 %  | 733   |
|  | COPD                               | 8.20 %  | 79    |
|  | Bronchiectasis                     | 7.44 %  | 27    |
|  | ILD                                | 6.51 %  | 11    |
|  | Other                              | 4.35 %  | 2     |
|  |                                    |         |       |
|  | <b>Used BLF or AUK nurse phone</b> | 7.19 %  | 684   |
|  | <b>By Gender</b>                   |         |       |
|  | Male                               | 6.29 %  | 109   |
|  | Female                             | 7.40 %  | 570   |
|  |                                    |         |       |
|  | <b>By Age</b>                      |         |       |
|  | 17 and under                       | 9.23 %  | 41    |
|  | 18 to 29                           | 8.06 %  | 78    |
|  | 30 to 39                           | 8.87 %  | 176   |
|  | 40 to 49                           | 8.36 %  | 214   |
|  | 50 to 59                           | 7.14 %  | 129   |
|  | 60 to 69                           | 2.89 %  | 31    |
|  | 70 to 79                           | 2.23 %  | 12    |
|  | 80 and above                       | 0       | 0     |
|  |                                    |         |       |

|                           |         |       |
|---------------------------|---------|-------|
| By diagnosis              |         |       |
| Asthma                    | 8.13 %  | 648   |
| COPD                      | 1.56 %  | 15    |
| Bronchiectasis            | 3.86 %  | 14    |
| ILD                       | 2.96 %  | 5     |
| Other                     | 4.35 %  | 2     |
|                           |         |       |
| <b>Used none of these</b> | 55.45 % | 5,278 |
| By Gender                 |         |       |
| Male                      | 57.11 % | 1,007 |
| Female                    | 54.85 % | 4,225 |
|                           |         |       |
| By Age                    |         |       |
| 17 and under              | 48.65 % | 216   |
| 18 to 29                  | 50.52 % | 489   |
| 30 to 39                  | 47.33 % | 939   |
| 40 to 49                  | 52.19 % | 1,336 |
| 50 to 59                  | 56.92 % | 1,028 |
| 60 to 69                  | 69.50 % | 745   |
| 70 to 79                  | 78.44 % | 422   |
| 80 and above              | 83.33 % | 60    |
|                           |         |       |
| By diagnosis              |         |       |
| Asthma                    | 52.69 % | 4,202 |
| COPD                      | 73.00 % | 703   |
| Bronchiectasis            | 65.84 % | 239   |
| ILD                       | 62.72 % | 106   |
| Other                     | 60.87 % | 28    |
|                           |         |       |

**Additional Graphs of Anxiety and Loneliness by Age and Diagnosis**

**Anxiety by Diagnosis**

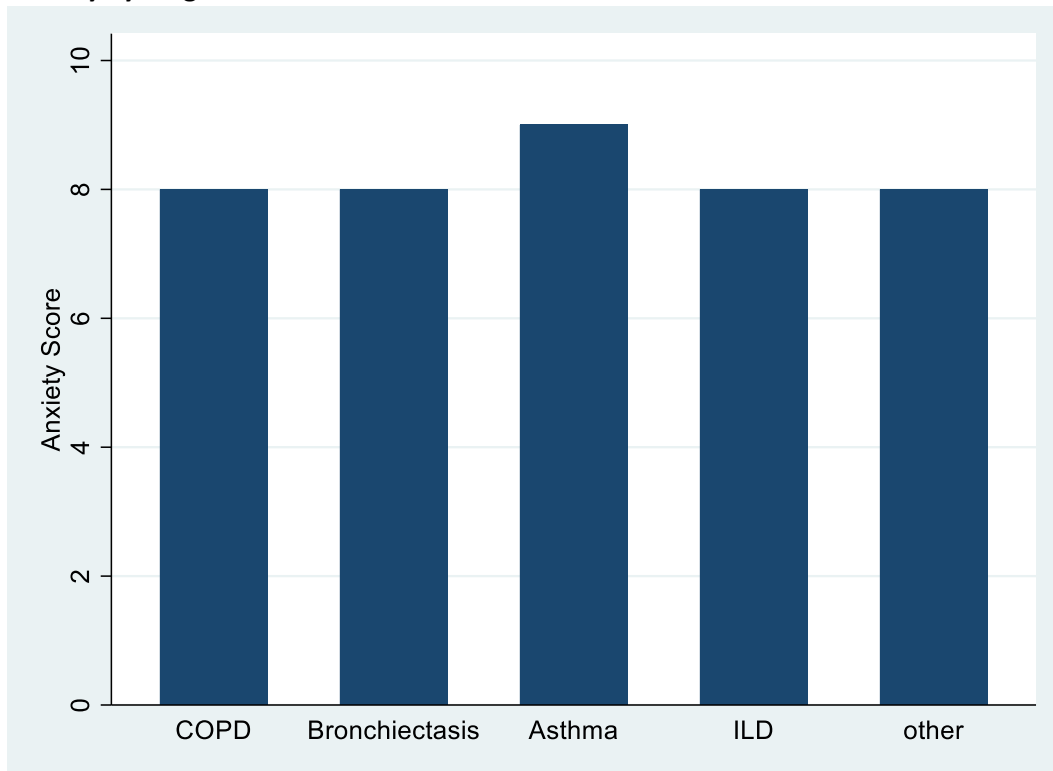

**Loneliness by Age Group**

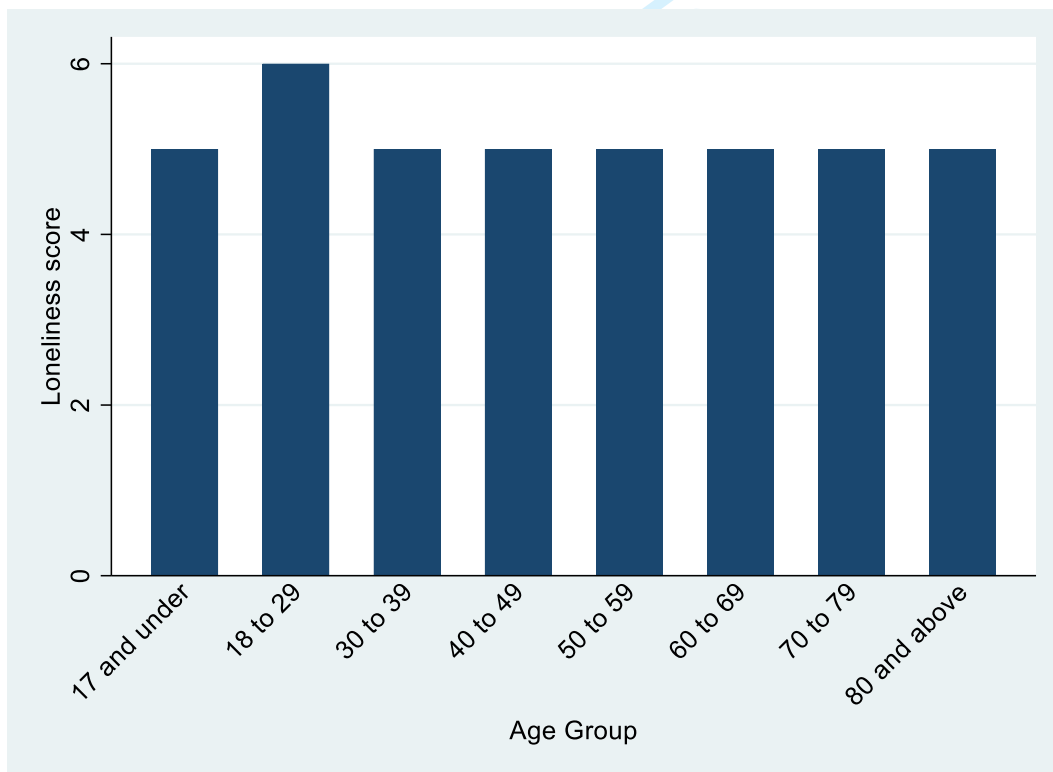

1  
2  
3  
4  
5  
6  
7  
8  
9  
10  
11  
12  
13  
14  
15  
16  
17  
18  
19  
20  
21  
22  
23  
24  
25  
26  
27  
28  
29  
30  
31  
32  
33  
34  
35  
36  
37  
38  
39  
40  
41  
42  
43  
44  
45  
46  
47  
48  
49  
50  
51  
52  
53  
54  
55  
56  
57  
58  
59  
60

Loneliness by Diagnosis



review only



# Reporting checklist for cross sectional study.

Based on the STROBE cross sectional guidelines.

## Instructions to authors

Complete this checklist by entering the page numbers from your manuscript where readers will find each of the items listed below.

Your article may not currently address all the items on the checklist. Please modify your text to include the missing information. If you are certain that an item does not apply, please write "n/a" and provide a short explanation.

Upload your completed checklist as an extra file when you submit to a journal.

In your methods section, say that you used the STROBE cross sectional reporting guidelines, and cite them as:

von Elm E, Altman DG, Egger M, Pocock SJ, Gøtzsche PC, Vandenbroucke JP. The Strengthening the Reporting of Observational Studies in Epidemiology (STROBE) Statement: guidelines for reporting observational studies.

|                           | Reporting Item                                                                                                                                     | Page Number |
|---------------------------|----------------------------------------------------------------------------------------------------------------------------------------------------|-------------|
| <b>Title and abstract</b> |                                                                                                                                                    |             |
| Title                     | <a href="#">#1a</a> Indicate the study's design with a commonly used term in the title or the abstract                                             | 1           |
| Abstract                  | <a href="#">#1b</a> Provide in the abstract an informative and balanced summary of what was done and what was found                                | 3           |
| <b>Introduction</b>       |                                                                                                                                                    |             |
| Background / rationale    | <a href="#">#2</a> Explain the scientific background and rationale for the investigation being reported                                            | 4           |
| Objectives                | <a href="#">#3</a> State specific objectives, including any prespecified hypotheses                                                                | 5           |
| <b>Methods</b>            |                                                                                                                                                    |             |
| Study design              | <a href="#">#4</a> Present key elements of study design early in the paper                                                                         | 5           |
| Setting                   | <a href="#">#5</a> Describe the setting, locations, and relevant dates, including periods of recruitment, exposure, follow-up, and data collection | 5           |

|    |                      |                      |                                                                                                                                                                                                                                                                                |                          |
|----|----------------------|----------------------|--------------------------------------------------------------------------------------------------------------------------------------------------------------------------------------------------------------------------------------------------------------------------------|--------------------------|
| 1  | Eligibility criteria | <a href="#">#6a</a>  | Give the eligibility criteria, and the sources and methods of selection of participants.                                                                                                                                                                                       | 5                        |
| 2  |                      |                      |                                                                                                                                                                                                                                                                                |                          |
| 3  |                      |                      |                                                                                                                                                                                                                                                                                |                          |
| 4  |                      |                      |                                                                                                                                                                                                                                                                                |                          |
| 5  |                      | <a href="#">#7</a>   | Clearly define all outcomes, exposures, predictors, potential confounders, and effect modifiers. Give diagnostic criteria, if applicable                                                                                                                                       | 5                        |
| 6  |                      |                      |                                                                                                                                                                                                                                                                                |                          |
| 7  |                      |                      |                                                                                                                                                                                                                                                                                |                          |
| 8  |                      |                      |                                                                                                                                                                                                                                                                                |                          |
| 9  |                      |                      |                                                                                                                                                                                                                                                                                |                          |
| 10 | Data sources /       | <a href="#">#8</a>   | For each variable of interest give sources of data and details of methods of assessment (measurement). Describe comparability of assessment methods if there is more than one group. Give information separately for for exposed and unexposed groups if applicable.           | 5                        |
| 11 | measurement          |                      |                                                                                                                                                                                                                                                                                |                          |
| 12 |                      |                      |                                                                                                                                                                                                                                                                                |                          |
| 13 |                      |                      |                                                                                                                                                                                                                                                                                |                          |
| 14 |                      |                      |                                                                                                                                                                                                                                                                                |                          |
| 15 |                      |                      |                                                                                                                                                                                                                                                                                |                          |
| 16 |                      |                      |                                                                                                                                                                                                                                                                                |                          |
| 17 |                      |                      |                                                                                                                                                                                                                                                                                |                          |
| 18 | Bias                 | <a href="#">#9</a>   | Describe any efforts to address potential sources of bias                                                                                                                                                                                                                      | 10                       |
| 19 |                      |                      |                                                                                                                                                                                                                                                                                |                          |
| 20 |                      |                      |                                                                                                                                                                                                                                                                                |                          |
| 21 | Study size           | <a href="#">#10</a>  | Explain how the study size was arrived at                                                                                                                                                                                                                                      | 6                        |
| 22 |                      |                      |                                                                                                                                                                                                                                                                                |                          |
| 23 | Quantitative         | <a href="#">#11</a>  | Explain how quantitative variables were handled in the analyses. If applicable, describe which groupings were chosen, and why                                                                                                                                                  | 6-9                      |
| 24 | variables            |                      |                                                                                                                                                                                                                                                                                |                          |
| 25 |                      |                      |                                                                                                                                                                                                                                                                                |                          |
| 26 |                      |                      |                                                                                                                                                                                                                                                                                |                          |
| 27 | Statistical          | <a href="#">#12a</a> | Describe all statistical methods, including those used to control for confounding                                                                                                                                                                                              | 6-9, Figure 1 and Tables |
| 28 | methods              |                      |                                                                                                                                                                                                                                                                                |                          |
| 29 |                      |                      |                                                                                                                                                                                                                                                                                |                          |
| 30 |                      |                      |                                                                                                                                                                                                                                                                                |                          |
| 31 | Statistical          | <a href="#">#12b</a> | Describe any methods used to examine subgroups and interactions                                                                                                                                                                                                                | Figure 1                 |
| 32 | methods              |                      |                                                                                                                                                                                                                                                                                |                          |
| 33 |                      |                      |                                                                                                                                                                                                                                                                                |                          |
| 34 |                      |                      |                                                                                                                                                                                                                                                                                |                          |
| 35 | Statistical          | <a href="#">#12c</a> | Explain how missing data were addressed                                                                                                                                                                                                                                        | n/a                      |
| 36 | methods              |                      |                                                                                                                                                                                                                                                                                |                          |
| 37 |                      |                      |                                                                                                                                                                                                                                                                                |                          |
| 38 | Statistical          | <a href="#">#12d</a> | If applicable, describe analytical methods taking account of sampling strategy                                                                                                                                                                                                 | n/a                      |
| 39 | methods              |                      |                                                                                                                                                                                                                                                                                |                          |
| 40 |                      |                      |                                                                                                                                                                                                                                                                                |                          |
| 41 |                      |                      |                                                                                                                                                                                                                                                                                |                          |
| 42 | Statistical          | <a href="#">#12e</a> | Describe any sensitivity analyses                                                                                                                                                                                                                                              | n/a                      |
| 43 | methods              |                      |                                                                                                                                                                                                                                                                                |                          |
| 44 |                      |                      |                                                                                                                                                                                                                                                                                |                          |
| 45 |                      |                      |                                                                                                                                                                                                                                                                                |                          |
| 46 | <b>Results</b>       |                      |                                                                                                                                                                                                                                                                                |                          |
| 47 |                      |                      |                                                                                                                                                                                                                                                                                |                          |
| 48 | Participants         | <a href="#">#13a</a> | Report numbers of individuals at each stage of study—eg numbers potentially eligible, examined for eligibility, confirmed eligible, included in the study, completing follow-up, and analysed. Give information separately for for exposed and unexposed groups if applicable. | 6                        |
| 49 |                      |                      |                                                                                                                                                                                                                                                                                |                          |
| 50 |                      |                      |                                                                                                                                                                                                                                                                                |                          |
| 51 |                      |                      |                                                                                                                                                                                                                                                                                |                          |
| 52 |                      |                      |                                                                                                                                                                                                                                                                                |                          |
| 53 |                      |                      |                                                                                                                                                                                                                                                                                |                          |
| 54 |                      |                      |                                                                                                                                                                                                                                                                                |                          |
| 55 |                      |                      |                                                                                                                                                                                                                                                                                |                          |
| 56 | Participants         | <a href="#">#13b</a> | Give reasons for non-participation at each stage                                                                                                                                                                                                                               | n/a                      |
| 57 |                      |                      |                                                                                                                                                                                                                                                                                |                          |
| 58 |                      |                      |                                                                                                                                                                                                                                                                                |                          |
| 59 |                      |                      |                                                                                                                                                                                                                                                                                |                          |
| 60 |                      |                      |                                                                                                                                                                                                                                                                                |                          |

|    |                    |                      |                                                                                                                                                                                                                   |                                      |
|----|--------------------|----------------------|-------------------------------------------------------------------------------------------------------------------------------------------------------------------------------------------------------------------|--------------------------------------|
| 1  | Participants       | <a href="#">#13c</a> | Consider use of a flow diagram                                                                                                                                                                                    | 6                                    |
| 2  |                    |                      |                                                                                                                                                                                                                   |                                      |
| 3  | Descriptive data   | <a href="#">#14a</a> | Give characteristics of study participants (eg demographic, clinical, social) and information on exposures and potential confounders. Give information separately for exposed and unexposed groups if applicable. | 6 and Table 1                        |
| 4  |                    |                      |                                                                                                                                                                                                                   |                                      |
| 5  |                    |                      |                                                                                                                                                                                                                   |                                      |
| 6  |                    |                      |                                                                                                                                                                                                                   |                                      |
| 7  |                    |                      |                                                                                                                                                                                                                   |                                      |
| 8  |                    |                      |                                                                                                                                                                                                                   |                                      |
| 9  |                    |                      |                                                                                                                                                                                                                   |                                      |
| 10 | Descriptive data   | <a href="#">#14b</a> | Indicate number of participants with missing data for each variable of interest                                                                                                                                   | Tables 1, 2, E1 and E2 (online supp) |
| 11 |                    |                      |                                                                                                                                                                                                                   |                                      |
| 12 |                    |                      |                                                                                                                                                                                                                   |                                      |
| 13 |                    |                      |                                                                                                                                                                                                                   |                                      |
| 14 |                    |                      |                                                                                                                                                                                                                   |                                      |
| 15 | Outcome data       | <a href="#">#15</a>  | Report numbers of outcome events or summary measures. Give information separately for exposed and unexposed groups if applicable.                                                                                 | n/a                                  |
| 16 |                    |                      |                                                                                                                                                                                                                   |                                      |
| 17 |                    |                      |                                                                                                                                                                                                                   |                                      |
| 18 |                    |                      |                                                                                                                                                                                                                   |                                      |
| 19 |                    |                      |                                                                                                                                                                                                                   |                                      |
| 20 |                    |                      |                                                                                                                                                                                                                   |                                      |
| 21 | Main results       | <a href="#">#16a</a> | Give unadjusted estimates and, if applicable, confounder-adjusted estimates and their precision (eg, 95% confidence interval). Make clear which confounders were adjusted for and why they were included          | 6                                    |
| 22 |                    |                      |                                                                                                                                                                                                                   |                                      |
| 23 |                    |                      |                                                                                                                                                                                                                   |                                      |
| 24 |                    |                      |                                                                                                                                                                                                                   |                                      |
| 25 |                    |                      |                                                                                                                                                                                                                   |                                      |
| 26 |                    |                      |                                                                                                                                                                                                                   |                                      |
| 27 | Main results       | <a href="#">#16b</a> | Report category boundaries when continuous variables were categorized                                                                                                                                             | 6                                    |
| 28 |                    |                      |                                                                                                                                                                                                                   |                                      |
| 29 |                    |                      |                                                                                                                                                                                                                   |                                      |
| 30 |                    |                      |                                                                                                                                                                                                                   |                                      |
| 31 | Main results       | <a href="#">#16c</a> | If relevant, consider translating estimates of relative risk into absolute risk for a meaningful time period                                                                                                      | n/a                                  |
| 32 |                    |                      |                                                                                                                                                                                                                   |                                      |
| 33 |                    |                      |                                                                                                                                                                                                                   |                                      |
| 34 |                    |                      |                                                                                                                                                                                                                   |                                      |
| 35 | Other analyses     | <a href="#">#17</a>  | Report other analyses done—e.g., analyses of subgroups and interactions, and sensitivity analyses                                                                                                                 | 6-9                                  |
| 36 |                    |                      |                                                                                                                                                                                                                   |                                      |
| 37 |                    |                      |                                                                                                                                                                                                                   |                                      |
| 38 |                    |                      |                                                                                                                                                                                                                   |                                      |
| 39 | <b>Discussion</b>  |                      |                                                                                                                                                                                                                   |                                      |
| 40 |                    |                      |                                                                                                                                                                                                                   |                                      |
| 41 | Key results        | <a href="#">#18</a>  | Summarise key results with reference to study objectives                                                                                                                                                          | 9-10                                 |
| 42 |                    |                      |                                                                                                                                                                                                                   |                                      |
| 43 | Limitations        | <a href="#">#19</a>  | Discuss limitations of the study, taking into account sources of potential bias or imprecision. Discuss both direction and magnitude of any potential bias.                                                       | 10                                   |
| 44 |                    |                      |                                                                                                                                                                                                                   |                                      |
| 45 |                    |                      |                                                                                                                                                                                                                   |                                      |
| 46 |                    |                      |                                                                                                                                                                                                                   |                                      |
| 47 |                    |                      |                                                                                                                                                                                                                   |                                      |
| 48 |                    |                      |                                                                                                                                                                                                                   |                                      |
| 49 | Interpretation     | <a href="#">#20</a>  | Give a cautious overall interpretation considering objectives, limitations, multiplicity of analyses, results from similar studies, and other relevant evidence.                                                  | 9-10                                 |
| 50 |                    |                      |                                                                                                                                                                                                                   |                                      |
| 51 |                    |                      |                                                                                                                                                                                                                   |                                      |
| 52 |                    |                      |                                                                                                                                                                                                                   |                                      |
| 53 |                    |                      |                                                                                                                                                                                                                   |                                      |
| 54 | Generalisability   | <a href="#">#21</a>  | Discuss the generalisability (external validity) of the study results                                                                                                                                             | 9-10                                 |
| 55 |                    |                      |                                                                                                                                                                                                                   |                                      |
| 56 |                    |                      |                                                                                                                                                                                                                   |                                      |
| 57 | <b>Other</b>       |                      |                                                                                                                                                                                                                   |                                      |
| 58 | <b>Information</b> |                      |                                                                                                                                                                                                                   |                                      |
| 59 |                    |                      |                                                                                                                                                                                                                   |                                      |
| 60 |                    |                      |                                                                                                                                                                                                                   |                                      |

1 Funding [#22](#) Give the source of funding and the role of the funders for the 1  
2 present study and, if applicable, for the original study on which the  
3 present article is based  
4  
5

6 Notes:  
7

- 8 • 12a: 6-9, Figure 1 and Tables
- 9 • 14a: 6 and Table 1
- 10 • 14b: Tables 1, 2, E1 and E2 (online supp) The STROBE checklist is distributed under the terms of the  
11 Creative Commons Attribution License CC-BY. This checklist was completed on 26. May 2020 using  
12 <https://www.goodreports.org/>, a tool made by the [EQUATOR Network](#) in collaboration with [Penelope.ai](#)  
13  
14  
15  
16  
17  
18  
19  
20  
21  
22  
23  
24  
25  
26  
27  
28  
29  
30  
31  
32  
33  
34  
35  
36  
37  
38  
39  
40  
41  
42  
43  
44  
45  
46  
47  
48  
49  
50  
51  
52  
53  
54  
55  
56  
57  
58  
59  
60
